# Supplementary material for: Genome-Scale Metabolic Modeling with Protein Expressions of Normal and Cancerous Colorectal Tissues for Oncogene Inference
Source: Metabolites. 2019 Dec 25;10(1):16. doi: 10.3390/metabo10010016 (PMC7022839; doi:10.3390/metabo10010016)
Supplement: Supplementary file 1 [file metabolites-10-00016-s001.zip › SupplementaryFile2.xlsx]

## Sheet: Nutrients
Table S1: Nutrients from RPMI-1640 and DMEM medium. The metabolites and exchange reactions used in the computation are listed as follows:
Reaction	Metabolite name
R_EX_arg_L(e)	L-Arginine
R_EX_gly(e)	Glycine
R_EX_his_L(e)	L-histidine
R_EX_ile_L(e)	L-isoleucine
R_EX_phe_L(e)	L-phenylalanine
R_EX_ser_L(e)	L-serine
R_EX_thr_L(e)	L-threonine
R_EX_trp_L(e)	L-tryptophan
R_EX_val_L(e)	L-valine
R_EX_asp_L(e)	L-aspartate(1-)
R_EX_glu_L(e)	L-glutamate(1-)
R_EX_pro_L(e)	L-proline
R_EX_tyr_L(e)	L-tyrosine
R_EX_asn_L(e)	L-asparagine
R_EX_btn(e)	Biotinate
R_EX_chol(e)	Choline
R_EX_fol(e)	Folic acid
R_EX_inost(e)	Myo-inositol
R_EX_ncam(e)	Nicotinamide
R_EX_pnto_R(e)	Pantothenic acid
R_EX_ribflv(e)	Riboflavin
R_EX_thm(e)	Thiamine(1+)
R_EX_pydx(e)	Pyridoxal
R_EX_gthrd(e)	Glutathionate(1-)
R_EX_pyr(e)	Pyruvate
R_EX_gln_L(e)	L-glutamine
R_EX_Lcystin(e)	L-cystine
R_EX_met_L(e)	L-methionine
R_EX_leu_L(e)	L-leucine
R_EX_lys_L(e)	L-lysinium(1+)
R_EX_ca2(e)	Calcium(2+)
R_EX_cl(e)	Chloride
R_EX_k(e)	Potassium(1+)
R_EX_na1(e)	Sodium(1+)
R_EX_fe3(e)	Iron(3+)
R_EX_hco3(e)	Hydrogen carbonate
R_EX_succ(e)	Succinate(2-)
R_EX_so4(e)	Sulfate
R_EX_4hpro€	Trans-4-hydroxy-L-proline
R_EX_pydxn(e)	Pyridoxine
R_EX_nh4(e)	Ammonium
R_EX_HC02172(e)	Zinc(2+)
R_EX_ala_L(e)	L-alanine
R_EX_hxan(e)	Hypoxanthine
R_EX_lnlc(e)	Linoleate
R_EX_ptrc(e)	1,4-butanediammonium
R_EX_thymd(e)	Thymidine
R_EX_creat(e)	Creatine
R_EX_leuleu(e)	Leucyl leucine
R_EX_carn(e)	Carnosine
R_EX_ahcys(e)	S-adenosyl-L-homocysteine
R_EX_tag_hs(e)	Triglyceride
R_EX_biocyt(e)	Biocytin
R_EX_glc(e)	D-glucopyranose
R_EX_o2(e)	Dioxygen
R_EX_co(e)	Carbon monoxide
R_EX_co2(e)	Carbon dioxide
R_EX_h(e)	Proton
R_EX_h2o(e)	Water
R_EX_h2o2(e)	Hydrogen peroxide
R_EX_hco3(e)	Hydrogen carbonate
R_EX_o2s(e)	Superoxide
R_EX_pi(e)	Hydrogen phosphate

## Sheet: EnzymeGenes
Table S2: Genes associated to FAP and HNPCC from GeneCards
Number in the square brackets is total number of genes.				Enzyme genes				Enzyme genes found in the study
FAP [1360]	HNPCC [852]	Common genes [537]		FAP [117]	HNPCC [49]	Common enzyme genes [28]		FAP[3]	HNPCC[0]
A2M-AS1	A2M-AS1	ABCA4		ABCA4	ABCB1	ABCB1		CAT
ABCA4	ABCB1	ABCC8		ABCB1	ABCC1	AMACR		CDO1
ABCB1	ABCC1	ABHD11-AS1		ABCC8	ABCC3	CD36		G6PD
ABCC8	ABCC3	ABR		ACADVL	ABCG2	CNDP2
ABHD11-AS1	ABCG2	ACTC1		ACE	ACER3	CYP1A1
ABL1	ABHD11-AS1	ACTG2		ACSS2	ALDOA	DPYD
ABL2	ABHD16A	ACVRL1		ADCY10	AMACR	ENPP7
ABR	ACER3	ADCY10		ALOX12	APRT	FH
ACADVL	ACTG1	AFP		ALOX15	ASS1	GALNT12
ACE	ACTG2	AKR7L		ALOX15B	CA2	GPX2
ACSS2	ACVR2A	AKT1		ALOX5	CA9	GSTM1
ACTA1	AFAP1-AS1	ALB		ALPG	CD36	HPGD
ACTB	AFDN-DT	ALK		AMACR	CKB	MTHFR
ACTC1	AFP	ALOX12		AMD1	CNDP2	NME1
ACTG2	AGAP2-AS1	ALOX15		B3GNT6	COMT	NOS2
ACTN4	AGO2	AMER1		CA1	CYP17A1	ODC1
ACTR2	AGR2	ANXA2P2		CAT	CYP1A1	PIK3CA
ACTR3	AIFM1	APAF1		CD36	DPYD	PIK3R1
ACVRL1	AIM2	APC		CDO1	ENPP7	PLA2G2A
ADAM23	AIMP2	APC2		CFTR	FH	PTEN
ADCY10	AKR7L	APELA		CHKA	FPGS	PTGDS
ADGRA2	AKT1	APOA1		CNDP2	GALNT12	PTGS1
ADGRA3	ALDOA	AR		COX5A	GPX2	PTGS2
ADRB2	AMACR	ARHGEF4		CPOX	GSTM1	SLC10A2
AFAP1-AS1	ANXA10	ATM		CTBP1	GUCY2C	TYMP
AFDN-DT	ANXA2	ATOH1		CYP19A1	HPGD	TYMS
AFP	ANXA2P2	AURKA		CYP1A1	HPRT1	UGT1A1
AGAP2-AS1	ANXA5	AXIN1		CYP1A2	MT-CO1	UMPS
AHR	ANXA6	AXIN2		CYP1B1	MTHFR
AKR7L	AOC4P	AXL		CYP27A1	NME1
AKT1	APC	BANCR		CYP27B1	NOS2
ALB	APP	BAP1		CYP2E1	NQO1
ALK	APRT	BAX		DHFR	ODC1
ALOX12	ARAF	BCAR4		DHRS9	PCBD1
ALOX15	AREG	BCL2		DPEP1	PIK3CA
ALOX15B	ARID1A	BCL2L1		DPYD	PIK3R1
ALOX5	ASS1	BCL2L11		ENO2	PLA2G2A
ALPG	ATM	BIRC5		ENPP7	PTEN
AMACR	AURKA	BLACAT1		EXT1	PTGDS
AMD1	AXIN1	BMP2		EXT2	PTGS1
AMER1	AXIN2	BMP4		EXTL3	PTGS2
AMER2	B2M	BMP6		FABP1	SHMT1
AMER3	BACE1-AS	BMPR1A		FABP2	SLC10A2
AMMECR1	BAK1	BRAF		FH	SLC2A1
ANAPC11	BANCR	BRCA1		FUT4	ST3GAL4
ANAPC2	BAX	BRCA2		G6PD	TYMP
ANAPC4	BCAR4	BTRC		GALNT12	TYMS
ANAPC5	BCL10	BUB1B		GGT1	UGT1A1
ANKS1B	BCL2	CACYBP		GGT3P	UMPS
ANP32B	BCL2L1	CALCA		GLS
ANXA1	BCL2L11	CAPN9		GLUL
ANXA2P2	BCYRN1	CASC2		GPX2
APAF1	BIRC5	CASC9		GPX3
APC	BLACAT1	CASP7		GSTM1
APC2	BLM	CASP9		GUK1
APCDD1	BMP3	CAT		HPGD
APCDD1L	BMP6	CBL		IDH1
APELA	BMPR1A	CBR3-AS1		KMT2A
APEX1	BNC2-AS1	CCKBR		KMT2D
APOA1	BRAF	CCN1		LPL
APOH	BRCA1	CCNB1		MINPP1
AR	BRCA2	CCND1		MPC1
ARAF	BRIP1	CCND2		MPO
ARHGAP32	BTG3-AS1	CCND2-AS1		MTAP
ARHGEF2	BUB1	CD28		MT-CO2
ARHGEF4	BUB1B	CD36		MT-CO3
ARMCX4	C10orf143	CD44		MTHFR
ARSH	C12orf75	CDH1		NME1
ASAP1	C2orf88	CDH13		NOS2
ASAP2	CA2	CDH17		NOS3
ASH2L	CA9	CDH2		OAT
ATAD2	CAB39L	CDK2		ODC1
ATF4	CACNA1G	CDK4		PAICS
ATG12	CACYBP	CDKN1A		PDE2A
ATM	CAHM	CDKN1B		PDE4B
ATOH1	CAPN5	CDKN1C		PDE5A
ATP2A3	CAPN9	CDKN2A		PIK3CA
ATP6AP2	CASC11	CDKN2B		PIK3CB
AURKA	CASC15	CDKN2C		PIK3CG
AURKB	CASC19	CDX1		PIK3R1
AXIN1	CASC2	CDX2		PKM
AXIN2	CASC8	CEACAM3		PLA2G10
AXL	CASC9	CEACAM5		PLA2G2A
B3GNT6	CASP1	CHGA		PLA2G4A
BAG1	CASP10	CHUK		PLA2G7
BAIAP2	CASP3	CLDN4		PLCB4
BAMBI	CASP5	COL11A1		PLCE1
BANCR	CASP8	COL1A1		PLCG2
BAP1	CASP9	COX5A		PPOX
BARHL1	CASR	CPOX		PTEN
BAX	CAV1	CREB1		PTGDS
BCAR1	CBR3-AS1	CREBBP		PTGES
BCAR4	CCAT1	CSF1R		PTGS1
BCL2	CCAT2	CSNK1D		PTGS2
BCL2L1	CCDC136	CSNK1E		RDH5
BCL2L11	CCKBR	CTNNA1		SAT1
BCL9L	CCN1	CTNNB1		SI
BID	CCNA2	CTNNBIP1		SLC10A2
BIRC5	CCNB1	CTSB		SLC12A5
BLACAT1	CCND1	CXCL8		SMPD1
BLZF1	CCND2	CXCR4		SOD1
BMI1	CD274	CYP1A1		SOD2
BMP2	CD36	CYP1A2		TH
BMP4	CD44	CYP27A1		TKT
BMP6	CDH1	CYTOR		TPO
BMPR1A	CDH13	DAB2IP		TYMP
BMPR1B	CDH17	DANCR		TYMS
BMPR2	CDK1	DAPK1		UGT1A1
BNC2-AS1	CDK2	DCC		UGT1A10
BRAF	CDK4	DCTN1		UGT1A3
BRCA1	CDKN1A	DDIT3		UGT1A4
BRCA2	CDKN1B	DES		UGT1A6
BTRC	CDKN2A	DICER1		UGT2B15
BUB1	CDKN2B	DKK1		UGT2B4
BUB1B	CDKN2B-AS1	DLEU1		UGT2B7
BUB3	CDKN3	DMBT1		UMPS
C1QBP	CDX1	DMTF1		XDH
CA1	CDX2	DNAH8
CACYBP	CEACAM1	DNMT1
CALCA	CEACAM3	DNMT3B
CAMK4	CEACAM5	DPYD
CAPN2	CEACAM6	DSC2
CAPN9	CEACAM7	DSG2
CAPNS1	CEBPA-DT	DSP
CASC15	CFLAR	EGF
CASC2	CHEK1	EGFR
CASC9	CHEK2	ELAVL1
CASP1	CKAP4	ELF3-AS1
CASP10	CKB	ELN
CASP3	CLDN4	ENG
CASP7	CLMAT3	ENPP7
CASP8	CNC2	ENSG00000224220
CASP9	CNDP2	ENSG00000225032
CASR	COL11A1	ENSG00000228079
CAST	COL1A1	ENSG00000229913
CAT	COL5A2	ENSG00000278769
CAV1	COLCA1	EP300
CBL	COLCA2	EPAS1
CBLIF	COMT	EPCAM
CBR3-AS1	CRCS11	EPHA2
CBY1	CRCS2	EPHX1
CCAT1	CRCS5	EPO
CCAT2	CRCS6	ERBB2
CCDC136	CRCS7	ERBB4
CCKBR	CRCS8	ERVH48-1
CCL20	CRCS9	ESR1
CCL26	CRNDE	ESR2
CCL7	CSE1L	EZH2
CCN1	CSF1R	F5
CCN4	CSMD3	FADD
CCNA1	CSNK1D	FAS
CCNA2	CSNK1E	FBN2
CCNB1	CTNNA1	FENDRR
CCNB3	CTNNB1	FER1L4
CCND1	CTSB	FGF2
CCND2	CTSD	FGF3
CCND2-AS1	CXCL12	FGF7
CCR6	CXCL8	FGFR1
CD24	CXCR4	FGFR2
CD28	CYCS	FHIT
CD36	CYP17A1	FHL2
CD44	CYP1A1	FLT4
CD80	CYTOR	FMO3
CD82	DACOR1	FOXO1
CD86	DANCR	FUT4
CD9	DAPK1	FYN
CDC20	DCC	FZD4
CDC23	DDIT3	FZD5
CDC25A	DDX47	FZD7
CDC27	DDX53	GADD45A
CDC40	DES	GALNT12
CDC42	DLC1	GAS5
CDC73	DLEU1	GAST
CDCA7L	DLEU7-AS1	GFAP
CDH1	DLGAP4-AS1	GFI1
CDH10	DMTF1	GGT1
CDH11	DNAH8	GKN1
CDH12	DNMT1	GLI2
CDH13	DNMT3B	GLI3
CDH15	DPP10-AS1	GNAS
CDH17	DPYD	GPC3
CDH18	DTX2P1-UPK3BP1-PMS2P11	GPR65
CDH2	DUXAP10	GREM1
CDH24	DUXAP8	GRIN2A
CDH3	DUXAP9	GSK3B
CDH4	E2F2	GSTM1
CDH5	E2F4	GSTT1
CDH6	EEF1G	H19
CDH7	EEF2	HAGLROS
CDH9	EGF	HDAC2
CDK1	EGFLAM-AS1	HES1
CDK2	EGFR	HFE
CDK4	EGOT	HIC1
CDK5	EHHADH-AS1	HIF1A
CDK5RAP2	EIF2A	HLA-A
CDK6	EIF2B2	HMGA2
CDK8	ELAVL1	HNF4A
CDKN1A	ENG	HOTAIR
CDKN1B	ENPP7	HOXA11-AS
CDKN1C	ENSG00000224220	HOXA13
CDKN2A	ENSG00000225032	HOXA-AS2
CDKN2B	ENSG00000228082	HRAS
CDKN2B-AS1	ENSG00000229717	HSP90AA1
CDKN2C	ENSG00000232406	HSPA4
CDKN3	ENSG00000237588	HSPA8
CDO1	ENSG00000249201	ICAM1
CDX1	ENSG00000250406	IFI27
CDX2	ENSG00000253389	IFNB1
CEACAM1	ENSG00000257241	IFNG
CEACAM3	ENSG00000260196	IGF1
CEACAM4	ENSG00000266680	IGF1R
CEACAM5	ENSG00000266990	IGF2
CEACAM6	ENSG00000277200	IKBKB
CEBPA-DT	ENSG00000278769	IL10
CEBPB	ENSG00000285159	IL1B
CEBPZ	ENTPD1-AS1	IL1RN
CETN3	EP300	IL33
CFLAR	EPCAM	IL4
CFTR	EPHA2	IL6
CGA	EPHA3	ILK
CHEK2	EPHB2	INHA
CHGA	EPHB6	INHBA-AS1
CHKA	EPHX1	INS
CHRNA3	EPM2AIP1	INSR
CHUK	ERBB2	INTS7
CITED1	ERBB3	IRF1
CKS1B	ERCC1	JAK1
CKS2	ERCC6	JKAMP
CLASP2	EREG	JUN
CLDN4	ERVH48-1	JUP
CLDN7	ESR1	KCNH2
CLIP1	ESR2	KCNQ1
CLU	ETS1	KCTD11
CNDP2	EXO1	KDR
CNTN2	EXOC3	KEAP1
COL11A1	EZH2	KHDRBS1
COL1A1	FAM83H-AS1	KIF3A
COPS3	FAM98A	KIFAP3
COPS5	FAN1	KIT
COPS8	FAS	KLC1
COX5A	FASLG	KLF4
CPOX	FBXL19-AS1	KLF6
CREB1	FBXO11	KRAS
CREBBP	FBXO32	KRT20
CRNDE	FBXW7	KRT5
CSF1	FCGBP	KRT7
CSF1R	FENDRR	KRT8
CSF2RB	FER1L4	LEP
CSNK1A1	FEZF1-AS1	LIF
CSNK1A1L	FGF7	LINC00052
CSNK1D	FGF7P5	LINC00271
CSNK1E	FGFR2	LINC00628
CSNK2A1	FGFR3	LINC00901
CSNK2A2	FH	LINC00941
CSNK2B	FHIT	LINC01194
CTBP1	FHL2	LINC-ROR
CTBP2	FLCN	LMNA
CTNNA1	FLNB	LOC101929759
CTNNB1	FLT1	LOX
CTNNBIP1	FLT4	LPL
CTNND1	FN1	LTA
CTNND2	FOS	LYN
CTSB	FOXO4	MACROH2A1
CTSD	FOXP4-AS1	MAGEA1
CTTNBP2	FPGS	MALAT1
CTTNBP2NL	FRGCA	MAP2
CUL1	FSHR	MAP2K1
CUL4B	FTO	MAPK1
CXCL1	FTX	MAPK14
CXCL12	FZD10	MAPK3
CXCL2	GABARAP	MAPK8
CXCL8	GABPB1-AS1	MAPRE1
CXCR4	GACAT2	MAPRE2
CYCS	GACAT3	MBD4
CYP19A1	GADD45A	MBL2
CYP1A1	GALNT12	MCC
CYP1A2	GAPLINC	MCF2
CYP1B1	GAS5	MCM5
CYP27A1	GAST	MDC1-AS1
CYP27B1	GATA6-AS1	MDM2
CYP2E1	GDF15	MEG3
CYTOR	GHET1	MEN1
DAB2IP	GKN1	MET
DACH1	GKN2	MGMT
DACT1	GNAS	MINPP1
DANCR	GOLGA4	MIR106A
DAPK1	GPR65	MIR106B
DAXX	GPX2	MIR122
DBP	GREM1	MIR125A
DCC	GRPR	MIR141
DCLK1	GSEC	MIR146A
DCP2	GSK3B	MIR150
DCTN1	GSTM1	MIR15B
DCTN1-AS1	GSTP1	MIR17
DCTN2	GSTT1	MIR182
DDB1	GUCA2A	MIR192
DDIT3	GUCY2C	MIR196B
DDX3X	H19	MIR197
DES	HAGLR	MIR19A
DHFR	HAGLROS	MIR200C
DHRS9	HDAC1	MIR203A
DIAPH1	HDAC2	MIR20A
DICER1	HEIH	MIR21
DKK1	HFE	MIR214
DKK4	HGF	MIR215
DLEU1	HIF1A	MIR221
DLG1	HIF1A-AS1	MIR222
DLG2	HIF1A-AS2	MIR223
DLG3	HIPK1-AS1	MIR24-2
DLG4	HLTF	MIR25
DLGAP1	HMGA2	MIR30B
DLGAP2	HMGB1	MIR30D
DLGAP5	HMMR	MIR326
DMBT1	HNF1A-AS1	MIR346
DMTF1	HNF4A	MIR34A
DNAH8	HOTAIR	MIR4435-2HG
DNAJA3	HOTAIRM1	MIR92A2
DNMT1	HOTTIP	MIR93
DNMT3A	HOXA11-AS	MLH1
DNMT3B	HOXA13	MLH3
DPEP1	HOXA-AS2	MMP1
DPYD	HOXB-AS3	MMP2
DSC2	HPGD	MMP7
DSG2	HPRT1	MMP9
DSP	HRAS	MPO
DUSP19	HSP90AA1	MSH2
DUXAP8	HSPA5	MSH3
DUXAP9	HSPH1	MSH6
DVL1	HULC	MSI1
DVL1P1	IARS1	MT1DP
DVL2	ICAM1	MT-CO2
DVL3	IFI27	MT-CO3
DYNC1I2	IFNA2	MTHFR
DYNLL1	IFNG	MUC1
E2F1	IGF1	MUC4
EFNA2	IGF1R	MUC5AC
EFNB2	IGF2	MUC6
EGF	IGF2R	MUTYH
EGFLAM-AS1	IGFBP2	MYB
EGFR	IGFBP3	MYC
EGOT	IGFBP7	MYCN
EIF5	IGKC	MYCNOS
ELAVL1	IL10	MYH1
ELF3-AS1	IL1B	MYOC
ELN	IL1RN	MYOD1
ELOF1	IL2	NAT2
EMD	IL4	NCAM1
ENC1	IL6	NEAT1
ENG	IL6R	NES
ENO2	INHBA-AS1	NEURL1
ENPP7	INTS7	NF1
ENSG00000224220	IQGAP1	NF2
ENSG00000225032	IRF1	NFATC1
ENSG00000228079	ITGA9	NFKB1
ENSG00000229717	ITGB1	NFKBIA
ENSG00000229913	JUN	NGFR
ENSG00000232406	JUP	NKX2-1
ENSG00000249201	KAT2A	NOS2
ENSG00000250406	KCNQ1OT1	NOTCH1
ENSG00000253389	KDR	NOTCH2
ENSG00000255109	KIF5B	NPTN-IT1
ENSG00000258864	KIT	NPY
ENSG00000260412	KLF4	NR1H4
ENSG00000261399	KLF5	NR4A2
ENSG00000266990	KLF6	NRAS
ENSG00000277200	KRAS	NRP1
ENSG00000278769	KRT18	NTHL1
ENSG00000285159	KRT18P55	NTRK1
ENTPD1-AS1	KRT19	NTRK2
EP300	KRT20	NTRK3
EP400	KRT24	NUDT1
EPAS1	KRT7	OTX2
EPB41L3	KRT7-AS	PAK1
EPB41L4A-AS1	KRT8	PANDAR
EPCAM	LAMC1-AS1	PARP1
EPHA2	LAMC2	PAX5
EPHB2	LEF1	PAX6
EPHX1	LEF1-AS1	PCAT1
EPO	LGALS3	PCNA
ERBB2	LGALS3BP	PDGFB
ERBB3	LGALS4	PDGFRA
ERBB4	LGR5	PDGFRB
ERBIN	LIG4	PECAM1
ERCC2	LINC00052	PGR
ERVH48-1	LINC00261	PIK3CA
ESPL1	LINC00460	PIK3R1
ESR1	LINC00472	PKD1
ESR2	LINC00538	PLA2G4A
EXT1	LINC00572	PLA2G7
EXT2	LINC00628	PLAG1
EXTL3	LINC00659	PLAU
EZH2	LINC00668	PLCG2
F5	LINC00673	PLEK
FABP1	LINC00858	PMS2
FABP2	LINC00901	POLB
FADD	LINC00941	POLD1
FAF1	LINC01006	PPARA
FAM126A	LINC01097	PPARG
FAM215A	LINC01133	PPM1D
FAP	LINC01234	PPP2CA
FAS	LINC01507	PPP2R5A
FBN2	LINC01567	PRKCA
FBXO5	LINC01612	PRKCB
FBXW11	LINC01617	PRKCD
FBXW7	LINC01772	PRKN
FEM1B	LINC01856	PRL
FEN1	LINC02086	PROM1
FENDRR	LINC02223	PRSS1
FER	LINC02446	PSCA
FER1L4	LINC02461	PSEN1
FEZF1-AS1	LINC-PINT	PTCH1
FGF2	LINC-ROR	PTCH2
FGF3	LMAN1	PTEN
FGF7	LNCRNA-ATB	PTENP1
FGF9	LOC101929759	PTGS1
FGFBP1	LOC105372446	PTGS2
FGFR1	LOC105373796	PTH
FGFR2	LOC111589215	PTK2
FH	LRRFIP2	PTPN11
FHIT	MACC1-AS1	PTPN13
FHL2	MACROD2-AS1	PVT1
FIBP	MAGEA1	RAC1
FLT4	MALAT1	RAF1
FMO3	MAMDC2-AS1	RAN
FOCAD	MAP2K1	RARB
FOS	MAP2K6	RB1
FOSL1	MAP3K20-AS1	REG4
FOXM1	MAPK1	RELA
FOXN2	MAPK3	RET
FOXO1	MAPK8	RHO
FOXO3	MAX	RMRP
FOXP3	MBD4	RNASEL
FRAT2	MCC	RNF43
FRGCA	MCL1	RPH3AL
FRZB	MCM9	RPL34-AS1
FUT4	MDC1-AS1	RUFY3
FYN	MDM2	RUNX3
FZD1	MEG3	S100A1
FZD10	MET	S100A6
FZD2	MGMT	SCG5
FZD4	MHS2	SELE
FZD5	MIAT	SERPINA3
FZD7	MIR100	SERPINB5
FZD9	MIR106A	SFRP1
FZR1	MIR106B	SGK1
G6PD	MIR107	SHH
GACAT2	MIR10A	SLC25A46
GACAT3	MIR10B	SMAD2
GADD45A	MIR122	SMAD3
GALNT12	MIR125A	SMAD4
GAPLINC	MIR126	SMAD7
GAS2	MIR127	SMARCA4
GAS5	MIR128-2	SMARCB1
GAS8-AS1	MIR129-2	SMO
GAST	MIR130B	SMPD1
GATA6-AS1	MIR132	SNHG1
GDF15	MIR133B	SNHG16
GFAP	MIR135B	SNHG5
GFI1	MIR137	SNHG7
GGT1	MIR139	SNHG8
GGT3P	MIR140	SOCS1
GH1	MIR141	SOD1
GHET1	MIR143	SOD2
GKN1	MIR145	SOX2
GKN2	MIR148A	SPARC
GLI1	MIR150	SPRY4-IT1
GLI2	MIR152	SRC
GLI3	MIR155	SRGAP1
GLS	MIR15B	SRRM4
GLUL	MIR17	SST
GMNN	MIR181A2	SSTR2
GNA12	MIR182	STAT1
GNA13	MIR183	STAT3
GNAS	MIR18A	STIM1
GNRH1	MIR191	STMN1
GPA33	MIR192	SUFU
GPC3	MIR195	TACC1
GPR65	MIR196B	TCF7L2
GPX2	MIR19A	TERT
GPX3	MIR200C	TFDP1
GREM1	MIR203A	TFF2
GRIN2A	MIR204	TFF3
GRIN2B	MIR20A	TG
GRK2	MIR20B	TGFA
GSDMC	MIR21	TGFB1
GSK3A	MIR214	TGFBR1
GSK3B	MIR215	TH
GSTA1	MIR221	THBD
GSTM1	MIR222	TIMP1
GSTP1	MIR223	TIMP2
GSTT1	MIR224	TIMP3
GUCA2A	MIR23A	TINCR
GUCA2B	MIR24-1	TKT
GUK1	MIR24-2	TLR2
H19	MIR25	TLR4
H3C1	MIR26A1	TNF
HAGLR	MIR27A	TNFRSF10A
HAGLROS	MIR27B	TNFRSF10B
HCP5	MIR296	TNFSF10
HDAC1	MIR29A	TOP1
HDAC2	MIR29B2	TOP2A
HDAC9	MIR30A	TP53
HECTD1	MIR31	TP73
HELLS	MIR31HG	TSC2
HERC5	MIR32	TSNAX-DISC1
HES1	MIR320A	TUSC7
HFE	MIR328	TYK2
HGF	MIR339	TYMP
HIC1	MIR342	TYMS
HIF1A	MIR345	UCA1
HIF1A-AS2	MIR34A	UCHL1
HIPK2	MIR34B	UGT1A6
HLA-A	MIR34C	UGT2B15
HLTF	MIR372	UNC5C
HMGA1	MIR422A	URGCP
HMGA2	MIR423	VCAM1
HNF1A	MIR4435-2HG	VEGFA
HNF1A-AS1	MIR451A	VEGFC
HNF4A	MIR454	VEGFD
HOTAIR	MIR497	VHL
HOTTIP	MIR512-1	VIM
HOXA11-AS	MIR532	VIP
HOXA13	MIR559	VTRNA2-1
HOXA-AS2	MIR675	WNT1
HOXB6	MIR7-3	WNT10A
HOXC13	MIR9-1	WNT2B
HOXD3	MIR92A2	WNT3A
HP	MIR93	WNT6
HPGD	MIR95	WNT9A
HPN	MIR96	WRN
HPSE	MIRLET7A1	WT1
HRAS	MIRLET7B	XDH
HSF1	MIRLET7F1	XPO1
HSP90AA1	MIRLET7G	YAP1
HSPA4	MKI67	ZFAS1
HSPA5	MLH1	ZFHX4-AS1
HSPA8	MLH3	ZIC1
HSPA9	MMP1
HSPD1	MMP11
HSPG2	MMP14
HSPH1	MMP2
HULC	MMP7
HUS1	MMP9
HUWE1	MMRN1
ICAM1	MNX1-AS1
ICE2	MRC1
ID1	MRE11
ID2	MROCKI
IDH1	MSH2
IFI27	MSH3
IFNB1	MSH4
IFNG	MSH5
IGF1	MSH6
IGF1R	MSTO2P
IGF2	MT1DP
IGF2R	MT1X
IGFBP2	MTA1
IGHA1	MT-CO1
IHH	MTHFR
IKBKB	MTOR
IL10	MUC1
IL10RA	MUC12
IL10RB	MUC2
IL13RA2	MUC3A
IL17A	MUC4
IL1B	MUC5AC
IL1RL1	MUC6
IL1RN	MUTYH
IL33	MYC
IL3RA	MYCNOS
IL4	MYH11
IL4R	MYL6
IL6	MYLK-AS1
IL6ST	MYOD1
ILK	NAT1
INCENP	NAT2
INHA	NBN
INHBA	NCRUPAR
INHBA-AS1	NDRG1
INS	NEAT1
INSIG2	NF1
INSR	NFE2L2
INTS7	NFKB1
IQGAP1	NME1
IRF1	NNT-AS1
IRS1	NOD2
IRS2	NORAD
ISG15	NOS2
ITGA3	NOTCH1
ITGAL	NPTN-IT1
JADE1	NQO1
JAK1	NRAS
JKAMP	NT5C3B
JRK	NTN1
JUN	NUDT1
JUP	ODC1
KAT2A	OGG1
KCNA4	OPN3
KCNH2	OR3A4P
KCNQ1	ORM1
KCNQ1OT1	ORMDL1
KCTD1	PAK1
KCTD11	PANDAR
KCTD21	PANTR1
KCTD6	PARP1
KDR	PARP12
KEAP1	PARVA
KHDRBS1	PBK
KIF17	PCAT1
KIF2C	PCBD1
KIF3A	PCNA
KIF3B	PCNA-AS1
KIFAP3	PDCD4
KIT	PDGFRA
KITLG	PDGFRL
KLC1	PHLPP1
KLF4	PHLPP2
KLF5	PIK3CA
KLF6	PIK3R1
KLK3	PINCR
KLRK1	PLA2G2A
KMT2A	PLAU
KMT2D	PLAUR
KRAS	PMS1
KRT1	PMS2
KRT13	PMS2CL
KRT18	PMS2P1
KRT18P55	PMS2P10
KRT19	PMS2P11
KRT20	PMS2P2
KRT24	PMS2P3
KRT31	PMS2P4
KRT5	PMS2P5
KRT7	PMS2P7
KRT7-AS	PMS2P9
KRT8	PNPT1
KRT81	POLD1
KRT9	POLE
LAMTOR2	POU5F1P4
LECT2	PPARD
LEF1	PPARG
LEP	PPP2R1B
LEPR	PRDM16-DT
LETMD1	PRNCR1
LFNG	PROM1
LGALS1	PRSS21
LGALS3	PSCA
LGALS3BP	PSG2
LGALS4	PTEN
LGR5	PTENP1
LGR6	PTGDS
LIF	PTGER4
LIMS1	PTGS1
LINC00052	PTGS2
LINC00261	PTK2
LINC00271	PTPN12
LINC00572	PTPRG
LINC00628	PTPRH
LINC00668	PTPRJ
LINC00673	PURPL
LINC00901	PVT1
LINC00941	PWRN1
LINC01006	PXN
LINC01097	RAD23B
LINC01133	RAD50
LINC01194	RAD51D
LINC01234	RAD51L3-RFFL
LINC01612	RAD54B
LINC01772	RAF1
LINC01856	RAPGEFL1
LINC01929	RARB
LINC02461	RASSF1
LINC-ROR	RB1
LMNA	RBM5-AS1
LMNB1	REEP5
LMO2	REG4
LNCNEF	RET
LNCRNA-ATB	RHO
LNX1	RHOA
LOC101929759	RINT1
LOC105372446	RIOX2
LOC110599580	RMRP
LOC111099027	RN7SK
LOC111099028	RNASE1
LOC111365141	RNASEL
LOC111589215	RNF43
LOX	RNY1
LPAR2	RNY3
LPL	RPL34-AS1
LRG1	RPS20
LRIG1	RPS6KB1
LRP5	RUFY3
LRP6	RUNX1-IT1
LRRFIP2	RUNX3
LTA	S100A4
LYN	S100A8
LZTS2	SBDSP1
MACC1-AS1	SEC61A1
MACF1	SEC63P1
MACROH2A1	SELE
MAD1L1	SELENBP1
MAD2L1	SERPINA1
MADCAM1	SERPINA2
MAGEA1	SERPINA3
MAGI3	SERPINB5
MALAT1	SERPINF1
MAP1A	SETD6
MAP2	SFRP1
MAP2K1	SFRP2
MAP3K1	SFTA1P
MAP3K11	SGK1
MAP3K20-AS1	SH3RF3-AS1
MAP3K7	SHMT1
MAP4K5	SIL1
MAPK1	SLC10A2
MAPK14	SLC25A25-AS1
MAPK3	SLC2A1
MAPK8	SLC5A4-AS1
MAPRE1	SLC7A11-AS1
MAPRE1P1	SMAD2
MAPRE2	SMAD3
MAPRE3	SMAD4
MBD4	SMAD7
MBL2	SMIM31
MCC	SNAI1
MCF2	SNHG1
MCM5	SNHG12
MDC1-AS1	SNHG14
MDM2	SNHG15
MEG3	SNHG16
MEMO1	SNHG17
MEN1	SNHG20
MET	SNHG3
MGMT	SNHG5
MIA	SNHG6
MIAT	SNHG7
MIF	SNHG8
MINPP1	SOCS1
MIR106A	SOX21-AS1
MIR106B	SOX2-OT
MIR107	SOX5
MIR1-1	SP1
MIR122	SPRY4-IT1
MIR125A	SPTAN1
MIR125B1	SPTB
MIR125B2	SPTBN1
MIR126	SQSTM1
MIR135A1	SRC
MIR135B	ST3GAL4
MIR141	ST6GAL1
MIR142	STAP2
MIR143	STAT1
MIR145	STAT3
MIR146A	STK11
MIR150	SUCLG2-AS1
MIR155	SUMO1P3
MIR15B	SYNE1
MIR17	TACC1
MIR182	TARBP2
MIR18A	TCF3
MIR191	TCF4
MIR192	TCF7
MIR193A	TCF7L1
MIR196B	TCF7L2
MIR197	TCN2
MIR199B	TCONS_00068220
MIR19A	TDGF1
MIR200C	TDRG1
MIR203A	TERT
MIR20A	TFDP1
MIR20B	TFF1
MIR21	TFF2
MIR210	TFF3
MIR214	TFPI
MIR215	TGFA
MIR221	TGFB1
MIR222	TGFB2
MIR223	TGFBR1
MIR24-1	TGFBR2
MIR24-2	TGIF1
MIR25	THBS1
MIR27A	TIAM1
MIR29C	TIMP1
MIR30B	TIMP2
MIR30D	TIMP3
MIR31HG	TINCR
MIR324	TLR2
MIR326	TLR4
MIR346	TLR9
MIR34A	TMEFF2
MIR34B	TMEM238L
MIR34C	TMSB4X
MIR3648-1	TNF
MIR372	TNFRSF10A
MIR423	TNFRSF10A-AS1
MIR4326	TNFRSF10B
MIR4435-2HG	TNFSF10
MIR451A	TOP1
MIR494	TOP2A
MIR512-1	TP53
MIR552	TP53COR1
MIR582	TP53TG1
MIR663A	TP73
MIR92A2	TRERNA1
MIR93	TSNAX-DISC1
MIR939	TUG1
MIRLET7B	TUSC7
MKI67	TUSC8
MKRN1	TXN2
MLH1	TYMP
MLH3	TYMS
MMP1	UCA1
MMP13	UGT1A1
MMP14	UHRF1
MMP2	UMPS
MMP7	UNC5C
MMP9	URGCP
MOAP1	USHBP1
MOS	VAMP8
MPC1	VDR
MPO	VEGFA
MRE11	VEGFC
MSH2	VEGFD
MSH3	VHL
MSH5	VIM-AS1
MSH6	VPS9D1-AS1
MSI1	VTRNA2-1
MSI2	WDR20
MST1R	WIF1
MSTO2P	WNT1
MT1DP	WNT2
MTAP	WNT2B
MT-CO2	WNT5A
MT-CO3	WNT6
MTHFR	WNT9A
MTOR	WRN
MUC1	WSPAR
MUC17	WT1-AS
MUC2	XIAP
MUC3A	XIST
MUC4	XRCC1
MUC5AC	XRCC2
MUC6	XRCC3
MUTYH	XRCC5
MYB	XRCC6
MYC	YAP1
MYCN	ZEB1
MYCNOS	ZEB1-AS1
MYH1	ZFAS1
MYH11	ZFHX4-AS1
MYLK-AS1	ZMAT1
MYOC	ZNF582-AS1
MYOD1
NAT1
NAT2
NAV2
NCAM1
NCRUPAR
NEAT1
NEIL1
NEIL2
NEIL3
NEK2
NEK6
NES
NEURL1
NF1
NF2
NFATC1
NFIA
NFIC
NFKB1
NFKBIA
NGF
NGFR
NIPSNAP1
NIPSNAP2
NKD1
NKX2-1
NLK
NME1
NOS2
NOS3
NOTCH1
NOTCH2
NOTCH3
NPEPPS
NPTN-IT1
NPY
NR1H2
NR1H4
NR3C1
NR4A1
NR4A2
NRAS
NRIP1
NRP1
NTF3
NTHL1
NTN1
NTRK1
NTRK2
NTRK3
NTS
NTSR1
NUDT1
NUP153
OAT
OCM2
ODC1
OGG1
OIP5-AS1
OLFM4
OR3A4P
ORM1
OTX2
PAICS
PAK1
PALD1
PANDAR
PANTR1
PAQR3
PARP1
PAWR
PAX3
PAX5
PAX6
PAX8
PBX1
PCAT1
PCNA
PCNA-AS1
PCNT
PDE2A
PDE4B
PDE5A
PDGFB
PDGFC
PDGFRA
PDGFRB
PDPK1
PEA15
PEBP1
PECAM1
PER1
PER2
PGR
PIK3CA
PIK3CB
PIK3CG
PIK3R1
PIK3R4
PIN1
PKD1
PKM
PLA2G10
PLA2G2A
PLA2G4A
PLA2G7
PLAA
PLAG1
PLAU
PLCB4
PLCE1
PLCG2
PLEK
PLK1
PMS1
PMS2
POLB
POLD1
POLE
POLE2
POLR2E
PPARA
PPARD
PPARG
PPM1D
PPM1L
PPOX
PPP1R15A
PPP1R9B
PPP2CA
PPP2CB
PPP2R1B
PPP2R5A
PPP2R5B
PPP2R5C
PRC1
PRDM16-DT
PRDM5
PRKACA
PRKAR1A
PRKCA
PRKCB
PRKCD
PRKCZ
PRKD1
PRKDC
PRKN
PRL
PRNCR1
PROM1
PRR15
PRSS1
PRSS21
PSCA
PSEN1
PSG2
PSG9
PSMD5
PSRC1
PTCH1
PTCH2
PTEN
PTENP1
PTGDS
PTGER1
PTGER2
PTGER3
PTGER4
PTGES
PTGS1
PTGS2
PTH
PTHLH
PTK2
PTK2B
PTPA
PTPN11
PTPN13
PTPRJ
PTTG1
PVT1
PWRN1
RAB4B
RABEP2
RAC1
RAD1
RAD21
RAD9A
RAF1
RAN
RANBP2
RANBP3
RARA
RARB
RASSF1
RB1
RB1CC1
RBBP5
RBX1
RDH5
REEP5
REG4
RELA
REST
RET
RETREG1
RGS3
RGS4
RGS9
RHBDF1
RHO
RHOA
RHOT1
RIOX2
RMRP
RN7SK
RNASEL
RNF114
RNF146
RNF43
ROCK1
ROR2
RP1
RPA2
RPH3AL
RPL31
RPL34-AS1
RPS20
RPS27A
RPS6KB1
RUFY3
RUNX1-IT1
RUNX3
RUVBL1
RXRA
S100A1
S100A3
S100A4
S100A6
S100A8
S100A9
S100B
SAG
SAT1
SCG5
SCGB1A1
SCRIB
SDC2
SELE
SEPTIN9
SERPINA3
SERPINB5
SERPINE1
SET
SFRP1
SFRP2
SFRP4
SFRP5
SFTA1P
SGK1
SH3RF3-AS1
SHH
SHOX2
SI
SIAH1
SIAH2
SIRT1
SKP1
SLC10A2
SLC12A5
SLC22A18
SLC25A46
SLC5A4-AS1
SLC7A11-AS1
SLC9A3R2
SLMAP
SMAD1
SMAD2
SMAD3
SMAD4
SMAD7
SMARCA4
SMARCA5
SMARCB1
SMIM31
SMO
SMPD1
SMURF1
SNAI1
SND1
SNHG1
SNHG12
SNHG14
SNHG15
SNHG16
SNHG20
SNHG5
SNHG6
SNHG7
SNHG8
SNRPE
SOCS1
SOD1
SOD2
SOX2
SOX2-OT
SOX4
SOX7
SOX9
SP3
SPARC
SPATA13
SPINK1
SPP1
SPRY4-IT1
SRC
SRGAP1
SRP19
SRRM4
SRSF1
SRSF6
SST
SSTR2
STAT1
STAT3
STIM1
STK11
STK19
STMN1
STRIP1
STRN
STRN3
STRN4
SUCLG2-AS1
SUFU
SUMO1P3
SYNM
SYP
TACC1
TAS2R38
TBL1X
TBL1Y
TCF3
TCF4
TCF7
TCF7L1
TCF7L2
TCHH
TCONS_00068220
TDGF1
TDRG1
TEAD4
TERT
TFAP2A
TFAP4
TFDP1
TFF1
TFF2
TFF3
TG
TGFA
TGFB1
TGFB2
TGFBR1
TGFBR2
TGM2
TH
THBD
THBS1
THBS2
THRB
TIAM1
TICAM2
TIE1
TIMP1
TIMP2
TIMP3
TINCR
TJP1
TKT
TLE1
TLE6
TLR2
TLR4
TLR9
TMED7
TMEFF2
TMEM132A
TMEM238L
TMEM9
TNF
TNFAIP3
TNFRSF10A
TNFRSF10A-AS1
TNFRSF10B
TNFRSF11A
TNFRSF19
TNFSF10
TNIK
TNKS
TOP1
TOP2A
TP53
TP53BP2
TP53COR1
TP73
TPO
TPTEP2-CSNK1E
TRAF1
TRAK2
TRERNA1
TRIM21
TRIM32
TRIM39
TRPS1
TRRAP
TSC2
TSHR
TSNAX-DISC1
TUBA1B
TUBA4A
TUBB
TUBE1
TUBG1
TUG1
TUSC7
TWIST1
TWIST2
TYK2
TYMP
TYMS
UBC
UBE2C
UBE2D1
UBE2D3
UBE2S
UBR5
UCA1
UCHL1
UGT1A1
UGT1A10
UGT1A3
UGT1A4
UGT1A6
UGT2B15
UGT2B4
UGT2B7
UMPS
UNC5C
URGCP
USF1
USF2
USP1
USP15
USP30
USP7
VASH2
VCAM1
VDR
VEGFA
VEGFC
VEGFD
VGLL4
VHL
VIM
VIP
VPS9D1-AS1
VTRNA2-1
WASL
WDR26
WIF1
WIPF1
WLS
WNT1
WNT10A
WNT10B
WNT2
WNT2B
WNT3
WNT3A
WNT5A
WNT6
WNT9A
WRN
WT1
WT1-AS
WWTR1
XDH
XIST
XPO1
XRCC5
YAP1
YBX3
YY1
ZBTB16
ZBTB17
ZBTB33
ZEB1
ZEB1-AS1
ZFAS1
ZFHX4-AS1
ZFP91
ZIC1
ZMAT1
ZNF148
ZRANB1
ZRSR2P1

## Sheet: FAP
Gene Symbol	Description	Category	Gifts	GC Id	Relevance score	GeneCards Link
APC	APC Regulator Of WNT Signaling Pathway	Protein Coding	49	GC05P112707	394.23	https://www.genecards.org/cgi-bin/carddisp.pl?gene=APC
MUTYH	MutY DNA Glycosylase	Protein Coding	45	GC01M045329	144.64	https://www.genecards.org/cgi-bin/carddisp.pl?gene=MUTYH
CTNNB1	Catenin Beta 1	Protein Coding	54	GC03P041236	100.6	https://www.genecards.org/cgi-bin/carddisp.pl?gene=CTNNB1
SMAD4	SMAD Family Member 4	Protein Coding	52	GC18P051028	89.14	https://www.genecards.org/cgi-bin/carddisp.pl?gene=SMAD4
TP53	Tumor Protein P53	Protein Coding	55	GC17M007661	77.23	https://www.genecards.org/cgi-bin/carddisp.pl?gene=TP53
MLH1	MutL Homolog 1	Protein Coding	49	GC03P036993	75.16	https://www.genecards.org/cgi-bin/carddisp.pl?gene=MLH1
MSH2	MutS Homolog 2	Protein Coding	49	GC02P047402	74.47	https://www.genecards.org/cgi-bin/carddisp.pl?gene=MSH2
MSH6	MutS Homolog 6	Protein Coding	50	GC02P047695	64.81	https://www.genecards.org/cgi-bin/carddisp.pl?gene=MSH6
MSH3	MutS Homolog 3	Protein Coding	44	GC05P080654	64.66	https://www.genecards.org/cgi-bin/carddisp.pl?gene=MSH3
NTHL1	Nth Like DNA Glycosylase 1	Protein Coding	45	GC16M002126	62.14	https://www.genecards.org/cgi-bin/carddisp.pl?gene=NTHL1
KRAS	KRAS Proto-Oncogene, GTPase	Protein Coding	52	GC12M025204	61.27	https://www.genecards.org/cgi-bin/carddisp.pl?gene=KRAS
BRCA2	BRCA2 DNA Repair Associated	Protein Coding	50	GC13P032315	61.03	https://www.genecards.org/cgi-bin/carddisp.pl?gene=BRCA2
PTEN	Phosphatase And Tensin Homolog	Protein Coding	54	GC10P087863	60.12	https://www.genecards.org/cgi-bin/carddisp.pl?gene=PTEN
BMPR1A	Bone Morphogenetic Protein Receptor Type 1A	Protein Coding	52	GC10P086756	59.86	https://www.genecards.org/cgi-bin/carddisp.pl?gene=BMPR1A
CDH1	Cadherin 1	Protein Coding	52	GC16P068737	59.79	https://www.genecards.org/cgi-bin/carddisp.pl?gene=CDH1
CCND1	Cyclin D1	Protein Coding	53	GC11P069641	57.59	https://www.genecards.org/cgi-bin/carddisp.pl?gene=CCND1
APC2	APC Regulator Of WNT Signaling Pathway 2	Protein Coding	42	GC19P001457	51.75	https://www.genecards.org/cgi-bin/carddisp.pl?gene=APC2
BRCA1	BRCA1 DNA Repair Associated	Protein Coding	52	GC17M043044	45.31	https://www.genecards.org/cgi-bin/carddisp.pl?gene=BRCA1
ODC1	Ornithine Decarboxylase 1	Protein Coding	48	GC02M010432	44.46	https://www.genecards.org/cgi-bin/carddisp.pl?gene=ODC1
HNF4A	Hepatocyte Nuclear Factor 4 Alpha	Protein Coding	52	GC20P044355	43.61	https://www.genecards.org/cgi-bin/carddisp.pl?gene=HNF4A
MCC	MCC Regulator Of WNT Signaling Pathway	Protein Coding	41	GC05M113022	43.25	https://www.genecards.org/cgi-bin/carddisp.pl?gene=MCC
PLA2G2A	Phospholipase A2 Group IIA	Protein Coding	47	GC01M019975	41.55	https://www.genecards.org/cgi-bin/carddisp.pl?gene=PLA2G2A
PTGS2	Prostaglandin-Endoperoxide Synthase 2	Protein Coding	50	GC01M186640	39.02	https://www.genecards.org/cgi-bin/carddisp.pl?gene=PTGS2
EGFR	Epidermal Growth Factor Receptor	Protein Coding	56	GC07P055019	38.04	https://www.genecards.org/cgi-bin/carddisp.pl?gene=EGFR
PMS2	PMS1 Homolog 2, Mismatch Repair System Component	Protein Coding	49	GC07M005973	38.04	https://www.genecards.org/cgi-bin/carddisp.pl?gene=PMS2
PIK3CA	Phosphatidylinositol-4,5-Bisphosphate 3-Kinase Catalytic Subunit Alpha	Protein Coding	53	GC03P179148	36.27	https://www.genecards.org/cgi-bin/carddisp.pl?gene=PIK3CA
CDKN2A	Cyclin Dependent Kinase Inhibitor 2A	Protein Coding	52	GC09M021967	36.26	https://www.genecards.org/cgi-bin/carddisp.pl?gene=CDKN2A
AKT1	AKT Serine/Threonine Kinase 1	Protein Coding	56	GC14M104769	35.72	https://www.genecards.org/cgi-bin/carddisp.pl?gene=AKT1
TSC2	TSC Complex Subunit 2	Protein Coding	51	GC16P002345	34.6	https://www.genecards.org/cgi-bin/carddisp.pl?gene=TSC2
BRAF	B-Raf Proto-Oncogene, Serine/Threonine Kinase	Protein Coding	55	GC07M140719	33.36	https://www.genecards.org/cgi-bin/carddisp.pl?gene=BRAF
AXIN2	Axin 2	Protein Coding	49	GC17M065528	32.47	https://www.genecards.org/cgi-bin/carddisp.pl?gene=AXIN2
TGFBR2	Transforming Growth Factor Beta Receptor 2	Protein Coding	53	GC03P030623	32.01	https://www.genecards.org/cgi-bin/carddisp.pl?gene=TGFBR2
MYC	MYC Proto-Oncogene, BHLH Transcription Factor	Protein Coding	53	GC08P127735	31.98	https://www.genecards.org/cgi-bin/carddisp.pl?gene=MYC
ACTC1	Actin Alpha Cardiac Muscle 1	Protein Coding	44	GC15M034788	31.38	https://www.genecards.org/cgi-bin/carddisp.pl?gene=ACTC1
IL1B	Interleukin 1 Beta	Protein Coding	49	GC02M112829	31.19	https://www.genecards.org/cgi-bin/carddisp.pl?gene=IL1B
BMP2	Bone Morphogenetic Protein 2	Protein Coding	48	GC20P006696	30.25	https://www.genecards.org/cgi-bin/carddisp.pl?gene=BMP2
ERBB2	Erb-B2 Receptor Tyrosine Kinase 2	Protein Coding	56	GC17P039687	30.09	https://www.genecards.org/cgi-bin/carddisp.pl?gene=ERBB2
RET	Ret Proto-Oncogene	Protein Coding	54	GC10P043081	29.98	https://www.genecards.org/cgi-bin/carddisp.pl?gene=RET
HRAS	HRas Proto-Oncogene, GTPase	Protein Coding	53	GC11M000522	29.98	https://www.genecards.org/cgi-bin/carddisp.pl?gene=HRAS
RB1	RB Transcriptional Corepressor 1	Protein Coding	50	GC13P048303	29.72	https://www.genecards.org/cgi-bin/carddisp.pl?gene=RB1
GSK3B	Glycogen Synthase Kinase 3 Beta	Protein Coding	51	GC03M119821	29.65	https://www.genecards.org/cgi-bin/carddisp.pl?gene=GSK3B
GREM1	Gremlin 1, DAN Family BMP Antagonist	Protein Coding	45	GC15P032717	29.4	https://www.genecards.org/cgi-bin/carddisp.pl?gene=GREM1
MAPRE1	Microtubule Associated Protein RP/EB Family Member 1	Protein Coding	45	GC20P032819	29.35	https://www.genecards.org/cgi-bin/carddisp.pl?gene=MAPRE1
KIT	KIT Proto-Oncogene, Receptor Tyrosine Kinase	Protein Coding	54	GC04P054657	29.14	https://www.genecards.org/cgi-bin/carddisp.pl?gene=KIT
EGF	Epidermal Growth Factor	Protein Coding	52	GC04P109912	28.74	https://www.genecards.org/cgi-bin/carddisp.pl?gene=EGF
H19	H19 Imprinted Maternally Expressed Transcript	RNA Gene	28	GC11M001995	28.12	https://www.genecards.org/cgi-bin/carddisp.pl?gene=H19
AXIN1	Axin 1	Protein Coding	48	GC16M000287	28.1	https://www.genecards.org/cgi-bin/carddisp.pl?gene=AXIN1
MUC1	Mucin 1, Cell Surface Associated	Protein Coding	49	GC01M155185	28.04	https://www.genecards.org/cgi-bin/carddisp.pl?gene=MUC1
CDKN1A	Cyclin Dependent Kinase Inhibitor 1A	Protein Coding	51	GC06P043367	27.87	https://www.genecards.org/cgi-bin/carddisp.pl?gene=CDKN1A
PMS1	PMS1 Homolog 1, Mismatch Repair System Component	Protein Coding	41	GC02P189784	27.75	https://www.genecards.org/cgi-bin/carddisp.pl?gene=PMS1
ENG	Endoglin	Protein Coding	48	GC09M127815	27.56	https://www.genecards.org/cgi-bin/carddisp.pl?gene=ENG
STK11	Serine/Threonine Kinase 11	Protein Coding	50	GC19P001177	26.99	https://www.genecards.org/cgi-bin/carddisp.pl?gene=STK11
PDGFRA	Platelet Derived Growth Factor Receptor Alpha	Protein Coding	56	GC04P054229	26.58	https://www.genecards.org/cgi-bin/carddisp.pl?gene=PDGFRA
IGF2	Insulin Like Growth Factor 2	Protein Coding	49	GC11M002130	26.3	https://www.genecards.org/cgi-bin/carddisp.pl?gene=IGF2
TERT	Telomerase Reverse Transcriptase	Protein Coding	52	GC05M001253	26.27	https://www.genecards.org/cgi-bin/carddisp.pl?gene=TERT
BAX	BCL2 Associated X, Apoptosis Regulator	Protein Coding	49	GC19P048954	25.87	https://www.genecards.org/cgi-bin/carddisp.pl?gene=BAX
MT-CO2	Mitochondrially Encoded Cytochrome C Oxidase II	Protein Coding	34	GCMTP007587	25.74	https://www.genecards.org/cgi-bin/carddisp.pl?gene=MT-CO2
PPARG	Peroxisome Proliferator Activated Receptor Gamma	Protein Coding	54	GC03P012287	25.28	https://www.genecards.org/cgi-bin/carddisp.pl?gene=PPARG
PDGFRB	Platelet Derived Growth Factor Receptor Beta	Protein Coding	56	GC05M150113	25.27	https://www.genecards.org/cgi-bin/carddisp.pl?gene=PDGFRB
POLE	DNA Polymerase Epsilon, Catalytic Subunit	Protein Coding	50	GC12M132624	25.17	https://www.genecards.org/cgi-bin/carddisp.pl?gene=POLE
NTRK1	Neurotrophic Receptor Tyrosine Kinase 1	Protein Coding	50	GC01P156786	24.9	https://www.genecards.org/cgi-bin/carddisp.pl?gene=NTRK1
CDK4	Cyclin Dependent Kinase 4	Protein Coding	56	GC12M057743	24.86	https://www.genecards.org/cgi-bin/carddisp.pl?gene=CDK4
RNF43	Ring Finger Protein 43	Protein Coding	40	GC17M058352	24.82	https://www.genecards.org/cgi-bin/carddisp.pl?gene=RNF43
APOA1	Apolipoprotein A1	Protein Coding	51	GC11M116835	24.41	https://www.genecards.org/cgi-bin/carddisp.pl?gene=APOA1
INS	Insulin	Protein Coding	49	GC11M002159	24.41	https://www.genecards.org/cgi-bin/carddisp.pl?gene=INS
PTGS1	Prostaglandin-Endoperoxide Synthase 1	Protein Coding	48	GC09P122370	24.41	https://www.genecards.org/cgi-bin/carddisp.pl?gene=PTGS1
NUDT1	Nudix Hydrolase 1	Protein Coding	43	GC07P002242	24.39	https://www.genecards.org/cgi-bin/carddisp.pl?gene=NUDT1
CTNNA1	Catenin Alpha 1	Protein Coding	49	GC05P138613	24.31	https://www.genecards.org/cgi-bin/carddisp.pl?gene=CTNNA1
MGMT	O-6-Methylguanine-DNA Methyltransferase	Protein Coding	50	GC10P129467	24.28	https://www.genecards.org/cgi-bin/carddisp.pl?gene=MGMT
MET	MET Proto-Oncogene, Receptor Tyrosine Kinase	Protein Coding	56	GC07P116672	24.01	https://www.genecards.org/cgi-bin/carddisp.pl?gene=MET
DES	Desmin	Protein Coding	49	GC02P219418	23.94	https://www.genecards.org/cgi-bin/carddisp.pl?gene=DES
CASP8	Caspase 8	Protein Coding	53	GC02P201233	23.66	https://www.genecards.org/cgi-bin/carddisp.pl?gene=CASP8
POLD1	DNA Polymerase Delta 1, Catalytic Subunit	Protein Coding	47	GC19P050385	23.62	https://www.genecards.org/cgi-bin/carddisp.pl?gene=POLD1
FGFR2	Fibroblast Growth Factor Receptor 2	Protein Coding	55	GC10M121478	23.59	https://www.genecards.org/cgi-bin/carddisp.pl?gene=FGFR2
MYCN	MYCN Proto-Oncogene, BHLH Transcription Factor	Protein Coding	48	GC02P015952	23.52	https://www.genecards.org/cgi-bin/carddisp.pl?gene=MYCN
TGFA	Transforming Growth Factor Alpha	Protein Coding	48	GC02M070447	23.47	https://www.genecards.org/cgi-bin/carddisp.pl?gene=TGFA
DNMT1	DNA Methyltransferase 1	Protein Coding	52	GC19M010133	23.2	https://www.genecards.org/cgi-bin/carddisp.pl?gene=DNMT1
MINPP1	Multiple Inositol-Polyphosphate Phosphatase 1	Protein Coding	46	GC10P087504	23.04	https://www.genecards.org/cgi-bin/carddisp.pl?gene=MINPP1
FGFR1	Fibroblast Growth Factor Receptor 1	Protein Coding	56	GC08M038400	22.54	https://www.genecards.org/cgi-bin/carddisp.pl?gene=FGFR1
TGFBR1	Transforming Growth Factor Beta Receptor 1	Protein Coding	54	GC09P099104	22.46	https://www.genecards.org/cgi-bin/carddisp.pl?gene=TGFBR1
IGF1R	Insulin Like Growth Factor 1 Receptor	Protein Coding	56	GC15P098648	22.37	https://www.genecards.org/cgi-bin/carddisp.pl?gene=IGF1R
AURKA	Aurora Kinase A	Protein Coding	51	GC20M056370	22.3	https://www.genecards.org/cgi-bin/carddisp.pl?gene=AURKA
PAX3	Paired Box 3	Protein Coding	48	GC02M222199	22.13	https://www.genecards.org/cgi-bin/carddisp.pl?gene=PAX3
PTCH1	Patched 1	Protein Coding	51	GC09M095442	22.11	https://www.genecards.org/cgi-bin/carddisp.pl?gene=PTCH1
TNF	Tumor Necrosis Factor	Protein Coding	53	GC06P032604	22.09	https://www.genecards.org/cgi-bin/carddisp.pl?gene=TNF
NOTCH1	Notch Receptor 1	Protein Coding	53	GC09M136562	22.05	https://www.genecards.org/cgi-bin/carddisp.pl?gene=NOTCH1
MIR34A	MicroRNA 34a	RNA Gene	21	GC01M009151	21.87	https://www.genecards.org/cgi-bin/carddisp.pl?gene=MIR34A
IL1RN	Interleukin 1 Receptor Antagonist	Protein Coding	49	GC02P114265	21.81	https://www.genecards.org/cgi-bin/carddisp.pl?gene=IL1RN
ABCC8	ATP Binding Cassette Subfamily C Member 8	Protein Coding	48	GC11M017392	21.74	https://www.genecards.org/cgi-bin/carddisp.pl?gene=ABCC8
NGF	Nerve Growth Factor	Protein Coding	52	GC01M115285	21.6	https://www.genecards.org/cgi-bin/carddisp.pl?gene=NGF
WNT1	Wnt Family Member 1	Protein Coding	48	GC12P049032	21.4	https://www.genecards.org/cgi-bin/carddisp.pl?gene=WNT1
MTHFR	Methylenetetrahydrofolate Reductase	Protein Coding	49	GC01M011785	21.36	https://www.genecards.org/cgi-bin/carddisp.pl?gene=MTHFR
CDKN1B	Cyclin Dependent Kinase Inhibitor 1B	Protein Coding	50	GC12P012716	21.33	https://www.genecards.org/cgi-bin/carddisp.pl?gene=CDKN1B
PLAU	Plasminogen Activator, Urokinase	Protein Coding	53	GC10P073909	21.16	https://www.genecards.org/cgi-bin/carddisp.pl?gene=PLAU
CDKN2B	Cyclin Dependent Kinase Inhibitor 2B	Protein Coding	48	GC09M022002	21.05	https://www.genecards.org/cgi-bin/carddisp.pl?gene=CDKN2B
NRAS	NRAS Proto-Oncogene, GTPase	Protein Coding	52	GC01M114704	20.95	https://www.genecards.org/cgi-bin/carddisp.pl?gene=NRAS
ENPP7	Ectonucleotide Pyrophosphatase/Phosphodiesterase 7	Protein Coding	40	GC17P079730	20.83	https://www.genecards.org/cgi-bin/carddisp.pl?gene=ENPP7
MIR20A	MicroRNA 20a	RNA Gene	17	GC13P091416	20.8	https://www.genecards.org/cgi-bin/carddisp.pl?gene=MIR20A
MIR21	MicroRNA 21	RNA Gene	22	GC17P059841	20.76	https://www.genecards.org/cgi-bin/carddisp.pl?gene=MIR21
MEN1	Menin 1	Protein Coding	48	GC11M064803	20.75	https://www.genecards.org/cgi-bin/carddisp.pl?gene=MEN1
BCL2	BCL2 Apoptosis Regulator	Protein Coding	53	GC18M063123	20.3	https://www.genecards.org/cgi-bin/carddisp.pl?gene=BCL2
CASP3	Caspase 3	Protein Coding	52	GC04M184627	20.13	https://www.genecards.org/cgi-bin/carddisp.pl?gene=CASP3
YAP1	Yes Associated Protein 1	Protein Coding	49	GC11P102110	19.69	https://www.genecards.org/cgi-bin/carddisp.pl?gene=YAP1
ALB	Albumin	Protein Coding	51	GC04P073397	19.39	https://www.genecards.org/cgi-bin/carddisp.pl?gene=ALB
BCL2L1	BCL2 Like 1	Protein Coding	49	GC20M031664	19.28	https://www.genecards.org/cgi-bin/carddisp.pl?gene=BCL2L1
ERBB3	Erb-B2 Receptor Tyrosine Kinase 3	Protein Coding	54	GC12P056080	19.14	https://www.genecards.org/cgi-bin/carddisp.pl?gene=ERBB3
MIR221	MicroRNA 221	RNA Gene	20	GC0XM045746	19.05	https://www.genecards.org/cgi-bin/carddisp.pl?gene=MIR221
MAP2K1	Mitogen-Activated Protein Kinase Kinase 1	Protein Coding	55	GC15P066386	19.02	https://www.genecards.org/cgi-bin/carddisp.pl?gene=MAP2K1
KDR	Kinase Insert Domain Receptor	Protein Coding	54	GC04M055078	18.93	https://www.genecards.org/cgi-bin/carddisp.pl?gene=KDR
SMAD3	SMAD Family Member 3	Protein Coding	49	GC15P067063	18.89	https://www.genecards.org/cgi-bin/carddisp.pl?gene=SMAD3
PAX6	Paired Box 6	Protein Coding	49	GC11M031784	18.87	https://www.genecards.org/cgi-bin/carddisp.pl?gene=PAX6
BAP1	BRCA1 Associated Protein 1	Protein Coding	46	GC03M052401	18.82	https://www.genecards.org/cgi-bin/carddisp.pl?gene=BAP1
SCG5	Secretogranin V	Protein Coding	39	GC15P032641	18.7	https://www.genecards.org/cgi-bin/carddisp.pl?gene=SCG5
TGFB1	Transforming Growth Factor Beta 1	Protein Coding	53	GC19M041301	18.7	https://www.genecards.org/cgi-bin/carddisp.pl?gene=TGFB1
MIR222	MicroRNA 222	RNA Gene	20	GC0XM045747	18.66	https://www.genecards.org/cgi-bin/carddisp.pl?gene=MIR222
SHH	Sonic Hedgehog Signaling Molecule	Protein Coding	50	GC07M155799	18.59	https://www.genecards.org/cgi-bin/carddisp.pl?gene=SHH
VEGFA	Vascular Endothelial Growth Factor A	Protein Coding	50	GC06P043770	18.33	https://www.genecards.org/cgi-bin/carddisp.pl?gene=VEGFA
EZH2	Enhancer Of Zeste 2 Polycomb Repressive Complex 2 Subunit	Protein Coding	54	GC07M148807	18.32	https://www.genecards.org/cgi-bin/carddisp.pl?gene=EZH2
ERBB4	Erb-B2 Receptor Tyrosine Kinase 4	Protein Coding	56	GC02M211375	18.32	https://www.genecards.org/cgi-bin/carddisp.pl?gene=ERBB4
FLT4	Fms Related Tyrosine Kinase 4	Protein Coding	54	GC05M180607	18.12	https://www.genecards.org/cgi-bin/carddisp.pl?gene=FLT4
MIR17	MicroRNA 17	RNA Gene	20	GC13P091350	18.09	https://www.genecards.org/cgi-bin/carddisp.pl?gene=MIR17
PDGFB	Platelet Derived Growth Factor Subunit B	Protein Coding	51	GC22M043145	18.09	https://www.genecards.org/cgi-bin/carddisp.pl?gene=PDGFB
CCND2	Cyclin D2	Protein Coding	51	GC12P006056	18.06	https://www.genecards.org/cgi-bin/carddisp.pl?gene=CCND2
NF1	Neurofibromin 1	Protein Coding	49	GC17P031007	17.98	https://www.genecards.org/cgi-bin/carddisp.pl?gene=NF1
HNF1A	HNF1 Homeobox A	Protein Coding	47	GC12P120978	17.97	https://www.genecards.org/cgi-bin/carddisp.pl?gene=HNF1A
VEGFC	Vascular Endothelial Growth Factor C	Protein Coding	48	GC04M176683	17.84	https://www.genecards.org/cgi-bin/carddisp.pl?gene=VEGFC
KCNQ1OT1	KCNQ1 Opposite Strand/Antisense Transcript 1	RNA Gene	25	GC11M002661	17.73	https://www.genecards.org/cgi-bin/carddisp.pl?gene=KCNQ1OT1
CREBBP	CREB Binding Protein	Protein Coding	53	GC16M003726	17.67	https://www.genecards.org/cgi-bin/carddisp.pl?gene=CREBBP
MIR146A	MicroRNA 146a	RNA Gene	22	GC05P160485	17.59	https://www.genecards.org/cgi-bin/carddisp.pl?gene=MIR146A
MIR106B	MicroRNA 106b	RNA Gene	21	GC07M100210	17.56	https://www.genecards.org/cgi-bin/carddisp.pl?gene=MIR106B
CDK6	Cyclin Dependent Kinase 6	Protein Coding	55	GC07M092604	17.56	https://www.genecards.org/cgi-bin/carddisp.pl?gene=CDK6
GLI3	GLI Family Zinc Finger 3	Protein Coding	49	GC07M041960	17.51	https://www.genecards.org/cgi-bin/carddisp.pl?gene=GLI3
MIR125A	MicroRNA 125a	RNA Gene	20	GC19P051726	17.41	https://www.genecards.org/cgi-bin/carddisp.pl?gene=MIR125A
MIR143	MicroRNA 143	RNA Gene	22	GC05P149410	17.38	https://www.genecards.org/cgi-bin/carddisp.pl?gene=MIR143
MIR203A	MicroRNA 203a	RNA Gene	19	GC14P104199	17.31	https://www.genecards.org/cgi-bin/carddisp.pl?gene=MIR203A
CASR	Calcium Sensing Receptor	Protein Coding	52	GC03P122183	17.27	https://www.genecards.org/cgi-bin/carddisp.pl?gene=CASR
IRS1	Insulin Receptor Substrate 1	Protein Coding	48	GC02M226731	17.27	https://www.genecards.org/cgi-bin/carddisp.pl?gene=IRS1
MIR145	MicroRNA 145	RNA Gene	21	GC05P149430	17.15	https://www.genecards.org/cgi-bin/carddisp.pl?gene=MIR145
IGF1	Insulin Like Growth Factor 1	Protein Coding	50	GC12M102395	17.14	https://www.genecards.org/cgi-bin/carddisp.pl?gene=IGF1
TYMS	Thymidylate Synthetase	Protein Coding	50	GC18P000657	17.05	https://www.genecards.org/cgi-bin/carddisp.pl?gene=TYMS
MMP9	Matrix Metallopeptidase 9	Protein Coding	54	GC20P046008	17.03	https://www.genecards.org/cgi-bin/carddisp.pl?gene=MMP9
TNFRSF10B	TNF Receptor Superfamily Member 10b	Protein Coding	52	GC08M023006	16.93	https://www.genecards.org/cgi-bin/carddisp.pl?gene=TNFRSF10B
SMARCB1	SWI/SNF Related, Matrix Associated, Actin Dependent Regulator Of Chromatin, Subfamily B, Member 1	Protein Coding	46	GC22P023786	16.91	https://www.genecards.org/cgi-bin/carddisp.pl?gene=SMARCB1
XIST	X Inactive Specific Transcript	RNA Gene	24	GC0XM073820	16.87	https://www.genecards.org/cgi-bin/carddisp.pl?gene=XIST
MIR27A	MicroRNA 27a	RNA Gene	21	GC19M013965	16.66	https://www.genecards.org/cgi-bin/carddisp.pl?gene=MIR27A
ALK	ALK Receptor Tyrosine Kinase	Protein Coding	52	GC02M029156	16.53	https://www.genecards.org/cgi-bin/carddisp.pl?gene=ALK
TG	Thyroglobulin	Protein Coding	44	GC08P132866	16.46	https://www.genecards.org/cgi-bin/carddisp.pl?gene=TG
NKX2-1	NK2 Homeobox 1	Protein Coding	46	GC14M036516	16.31	https://www.genecards.org/cgi-bin/carddisp.pl?gene=NKX2-1
NF2	Neurofibromin 2	Protein Coding	50	GC22P029603	16.31	https://www.genecards.org/cgi-bin/carddisp.pl?gene=NF2
ESR1	Estrogen Receptor 1	Protein Coding	54	GC06P151656	16.3	https://www.genecards.org/cgi-bin/carddisp.pl?gene=ESR1
MIR122	MicroRNA 122	RNA Gene	19	GC18P058451	16.27	https://www.genecards.org/cgi-bin/carddisp.pl?gene=MIR122
MIR141	MicroRNA 141	RNA Gene	21	GC12P007692	16.23	https://www.genecards.org/cgi-bin/carddisp.pl?gene=MIR141
CHEK2	Checkpoint Kinase 2	Protein Coding	54	GC22M028687	16.21	https://www.genecards.org/cgi-bin/carddisp.pl?gene=CHEK2
MIR19A	MicroRNA 19a	RNA Gene	18	GC13P091415	16.18	https://www.genecards.org/cgi-bin/carddisp.pl?gene=MIR19A
CASP10	Caspase 10	Protein Coding	49	GC02P201182	16.15	https://www.genecards.org/cgi-bin/carddisp.pl?gene=CASP10
MIR106A	MicroRNA 106a	RNA Gene	17	GC0XM134240	16.13	https://www.genecards.org/cgi-bin/carddisp.pl?gene=MIR106A
MIR199B	MicroRNA 199b	RNA Gene	19	GC09M128244	16.09	https://www.genecards.org/cgi-bin/carddisp.pl?gene=MIR199B
MIR200C	MicroRNA 200c	RNA Gene	20	GC12P007691	16	https://www.genecards.org/cgi-bin/carddisp.pl?gene=MIR200C
MAPK3	Mitogen-Activated Protein Kinase 3	Protein Coding	50	GC16M030117	15.96	https://www.genecards.org/cgi-bin/carddisp.pl?gene=MAPK3
OGG1	8-Oxoguanine DNA Glycosylase	Protein Coding	48	GC03P009751	15.94	https://www.genecards.org/cgi-bin/carddisp.pl?gene=OGG1
WRN	WRN RecQ Like Helicase	Protein Coding	48	GC08P031033	15.94	https://www.genecards.org/cgi-bin/carddisp.pl?gene=WRN
IDH1	Isocitrate Dehydrogenase (NADP(+)) 1	Protein Coding	54	GC02M208236	15.94	https://www.genecards.org/cgi-bin/carddisp.pl?gene=IDH1
HGF	Hepatocyte Growth Factor	Protein Coding	53	GC07M081699	15.89	https://www.genecards.org/cgi-bin/carddisp.pl?gene=HGF
WT1	WT1 Transcription Factor	Protein Coding	49	GC11M032365	15.86	https://www.genecards.org/cgi-bin/carddisp.pl?gene=WT1
KLF6	Kruppel Like Factor 6	Protein Coding	45	GC10M003779	15.86	https://www.genecards.org/cgi-bin/carddisp.pl?gene=KLF6
JUN	Jun Proto-Oncogene, AP-1 Transcription Factor Subunit	Protein Coding	50	GC01M058780	15.83	https://www.genecards.org/cgi-bin/carddisp.pl?gene=JUN
GPC3	Glypican 3	Protein Coding	47	GC0XM133535	15.82	https://www.genecards.org/cgi-bin/carddisp.pl?gene=GPC3
PPM1D	Protein Phosphatase, Mg2+/Mn2+ Dependent 1D	Protein Coding	49	GC17P060600	15.69	https://www.genecards.org/cgi-bin/carddisp.pl?gene=PPM1D
STAT3	Signal Transducer And Activator Of Transcription 3	Protein Coding	54	GC17M042313	15.59	https://www.genecards.org/cgi-bin/carddisp.pl?gene=STAT3
GSTP1	Glutathione S-Transferase Pi 1	Protein Coding	50	GC11P067583	15.52	https://www.genecards.org/cgi-bin/carddisp.pl?gene=GSTP1
MIR223	MicroRNA 223	RNA Gene	20	GC0XP066018	15.36	https://www.genecards.org/cgi-bin/carddisp.pl?gene=MIR223
MAPK1	Mitogen-Activated Protein Kinase 1	Protein Coding	52	GC22M021754	15.14	https://www.genecards.org/cgi-bin/carddisp.pl?gene=MAPK1
SUFU	SUFU Negative Regulator Of Hedgehog Signaling	Protein Coding	44	GC10P102503	15.06	https://www.genecards.org/cgi-bin/carddisp.pl?gene=SUFU
EPCAM	Epithelial Cell Adhesion Molecule	Protein Coding	48	GC02P047345	15.03	https://www.genecards.org/cgi-bin/carddisp.pl?gene=EPCAM
MUC5AC	Mucin 5AC, Oligomeric Mucus/Gel-Forming	Protein Coding	41	GC11P001151	14.99	https://www.genecards.org/cgi-bin/carddisp.pl?gene=MUC5AC
CDX2	Caudal Type Homeobox 2	Protein Coding	44	GC13M027962	14.93	https://www.genecards.org/cgi-bin/carddisp.pl?gene=CDX2
MMP2	Matrix Metallopeptidase 2	Protein Coding	54	GC16P055390	14.9	https://www.genecards.org/cgi-bin/carddisp.pl?gene=MMP2
RASSF1	Ras Association Domain Family Member 1	Protein Coding	45	GC03M050329	14.89	https://www.genecards.org/cgi-bin/carddisp.pl?gene=RASSF1
MIR107	MicroRNA 107	RNA Gene	18	GC10M089602	14.8	https://www.genecards.org/cgi-bin/carddisp.pl?gene=MIR107
MIR214	MicroRNA 214	RNA Gene	19	GC01M172219	14.65	https://www.genecards.org/cgi-bin/carddisp.pl?gene=MIR214
LMNA	Lamin A/C	Protein Coding	49	GC01P156082	14.64	https://www.genecards.org/cgi-bin/carddisp.pl?gene=LMNA
DPYD	Dihydropyrimidine Dehydrogenase	Protein Coding	53	GC01M097015	14.64	https://www.genecards.org/cgi-bin/carddisp.pl?gene=DPYD
PSEN1	Presenilin 1	Protein Coding	53	GC14P073136	14.61	https://www.genecards.org/cgi-bin/carddisp.pl?gene=PSEN1
SRC	SRC Proto-Oncogene, Non-Receptor Tyrosine Kinase	Protein Coding	53	GC20P037344	14.57	https://www.genecards.org/cgi-bin/carddisp.pl?gene=SRC
SMARCA4	SWI/SNF Related, Matrix Associated, Actin Dependent Regulator Of Chromatin, Subfamily A, Member 4	Protein Coding	52	GC19P010932	14.51	https://www.genecards.org/cgi-bin/carddisp.pl?gene=SMARCA4
CASP9	Caspase 9	Protein Coding	49	GC01M015491	14.48	https://www.genecards.org/cgi-bin/carddisp.pl?gene=CASP9
MIR25	MicroRNA 25	RNA Gene	19	GC07M100093	14.39	https://www.genecards.org/cgi-bin/carddisp.pl?gene=MIR25
MIR15B	MicroRNA 15b	RNA Gene	17	GC03P160404	14.37	https://www.genecards.org/cgi-bin/carddisp.pl?gene=MIR15B
MIR451A	MicroRNA 451a	RNA Gene	16	GC17M028861	14.35	https://www.genecards.org/cgi-bin/carddisp.pl?gene=MIR451A
CYP19A1	Cytochrome P450 Family 19 Subfamily A Member 1	Protein Coding	50	GC15M051208	14.34	https://www.genecards.org/cgi-bin/carddisp.pl?gene=CYP19A1
MIR18A	MicroRNA 18a	RNA Gene	17	GC13P091408	14.24	https://www.genecards.org/cgi-bin/carddisp.pl?gene=MIR18A
BMP6	Bone Morphogenetic Protein 6	Protein Coding	45	GC06P007726	14.23	https://www.genecards.org/cgi-bin/carddisp.pl?gene=BMP6
APEX1	Apurinic/Apyrimidinic Endodeoxyribonuclease 1	Protein Coding	46	GC14P020455	14.19	https://www.genecards.org/cgi-bin/carddisp.pl?gene=APEX1
MIR93	MicroRNA 93	RNA Gene	20	GC07M100192	14.05	https://www.genecards.org/cgi-bin/carddisp.pl?gene=MIR93
HIF1A	Hypoxia Inducible Factor 1 Subunit Alpha	Protein Coding	49	GC14P061695	13.86	https://www.genecards.org/cgi-bin/carddisp.pl?gene=HIF1A
ABCB1	ATP Binding Cassette Subfamily B Member 1	Protein Coding	52	GC07M087504	13.83	https://www.genecards.org/cgi-bin/carddisp.pl?gene=ABCB1
TSHR	Thyroid Stimulating Hormone Receptor	Protein Coding	48	GC14P080954	13.74	https://www.genecards.org/cgi-bin/carddisp.pl?gene=TSHR
SMAD2	SMAD Family Member 2	Protein Coding	48	GC18M047809	13.58	https://www.genecards.org/cgi-bin/carddisp.pl?gene=SMAD2
SYP	Synaptophysin	Protein Coding	45	GC0XM049187	13.56	https://www.genecards.org/cgi-bin/carddisp.pl?gene=SYP
MDM2	MDM2 Proto-Oncogene	Protein Coding	54	GC12P068808	13.53	https://www.genecards.org/cgi-bin/carddisp.pl?gene=MDM2
REST	RE1 Silencing Transcription Factor	Protein Coding	45	GC04P056907	13.47	https://www.genecards.org/cgi-bin/carddisp.pl?gene=REST
GLI2	GLI Family Zinc Finger 2	Protein Coding	49	GC02P120735	13.46	https://www.genecards.org/cgi-bin/carddisp.pl?gene=GLI2
GSTM1	Glutathione S-Transferase Mu 1	Protein Coding	42	GC01P109687	13.37	https://www.genecards.org/cgi-bin/carddisp.pl?gene=GSTM1
VHL	Von Hippel-Lindau Tumor Suppressor	Protein Coding	47	GC03P010192	13.27	https://www.genecards.org/cgi-bin/carddisp.pl?gene=VHL
KCNQ1	Potassium Voltage-Gated Channel Subfamily Q Member 1	Protein Coding	50	GC11P002444	13.24	https://www.genecards.org/cgi-bin/carddisp.pl?gene=KCNQ1
BIRC5	Baculoviral IAP Repeat Containing 5	Protein Coding	48	GC17P078214	13.21	https://www.genecards.org/cgi-bin/carddisp.pl?gene=BIRC5
THRB	Thyroid Hormone Receptor Beta	Protein Coding	50	GC03M024117	13.21	https://www.genecards.org/cgi-bin/carddisp.pl?gene=THRB
PTH	Parathyroid Hormone	Protein Coding	48	GC11M013492	13.18	https://www.genecards.org/cgi-bin/carddisp.pl?gene=PTH
CDK2	Cyclin Dependent Kinase 2	Protein Coding	54	GC12P055966	13.11	https://www.genecards.org/cgi-bin/carddisp.pl?gene=CDK2
MLH3	MutL Homolog 3	Protein Coding	42	GC14M075013	13.09	https://www.genecards.org/cgi-bin/carddisp.pl?gene=MLH3
MIR30B	MicroRNA 30b	RNA Gene	18	GC08M134800	13.09	https://www.genecards.org/cgi-bin/carddisp.pl?gene=MIR30B
ACTG2	Actin Gamma 2, Smooth Muscle	Protein Coding	47	GC02P073892	13.08	https://www.genecards.org/cgi-bin/carddisp.pl?gene=ACTG2
TIMP3	TIMP Metallopeptidase Inhibitor 3	Protein Coding	46	GC22P032800	13.04	https://www.genecards.org/cgi-bin/carddisp.pl?gene=TIMP3
NOTCH2	Notch Receptor 2	Protein Coding	51	GC01M119911	13.01	https://www.genecards.org/cgi-bin/carddisp.pl?gene=NOTCH2
SMO	Smoothened, Frizzled Class Receptor	Protein Coding	50	GC07P129217	12.98	https://www.genecards.org/cgi-bin/carddisp.pl?gene=SMO
S100B	S100 Calcium Binding Protein B	Protein Coding	46	GC21M046633	12.92	https://www.genecards.org/cgi-bin/carddisp.pl?gene=S100B
PTCH2	Patched 2	Protein Coding	46	GC01M044819	12.9	https://www.genecards.org/cgi-bin/carddisp.pl?gene=PTCH2
CDKN2C	Cyclin Dependent Kinase Inhibitor 2C	Protein Coding	47	GC01P050960	12.77	https://www.genecards.org/cgi-bin/carddisp.pl?gene=CDKN2C
SLC22A18	Solute Carrier Family 22 Member 18	Protein Coding	43	GC11P002899	12.7	https://www.genecards.org/cgi-bin/carddisp.pl?gene=SLC22A18
GNAS	GNAS Complex Locus	Protein Coding	51	GC20P058839	12.67	https://www.genecards.org/cgi-bin/carddisp.pl?gene=GNAS
PROM1	Prominin 1	Protein Coding	46	GC04M015965	12.6	https://www.genecards.org/cgi-bin/carddisp.pl?gene=PROM1
MUC2	Mucin 2, Oligomeric Mucus/Gel-Forming	Protein Coding	41	GC11P001074	12.59	https://www.genecards.org/cgi-bin/carddisp.pl?gene=MUC2
MIR192	MicroRNA 192	RNA Gene	20	GC11M064891	12.47	https://www.genecards.org/cgi-bin/carddisp.pl?gene=MIR192
CD44	CD44 Molecule (Indian Blood Group)	Protein Coding	49	GC11P035139	12.46	https://www.genecards.org/cgi-bin/carddisp.pl?gene=CD44
VDR	Vitamin D Receptor	Protein Coding	53	GC12M047841	12.34	https://www.genecards.org/cgi-bin/carddisp.pl?gene=VDR
PAK1	P21 (RAC1) Activated Kinase 1	Protein Coding	49	GC11M077321	12.25	https://www.genecards.org/cgi-bin/carddisp.pl?gene=PAK1
IRF1	Interferon Regulatory Factor 1	Protein Coding	49	GC05M132481	12.2	https://www.genecards.org/cgi-bin/carddisp.pl?gene=IRF1
IL6	Interleukin 6	Protein Coding	50	GC07P022765	12.19	https://www.genecards.org/cgi-bin/carddisp.pl?gene=IL6
MIR150	MicroRNA 150	RNA Gene	20	GC19M049500	12.18	https://www.genecards.org/cgi-bin/carddisp.pl?gene=MIR150
GAST	Gastrin	Protein Coding	41	GC17P041712	12.17	https://www.genecards.org/cgi-bin/carddisp.pl?gene=GAST
CDKN2B-AS1	CDKN2B Antisense RNA 1	RNA Gene	20	GC09P021994	12.17	https://www.genecards.org/cgi-bin/carddisp.pl?gene=CDKN2B-AS1
ENO2	Enolase 2	Protein Coding	49	GC12P006913	12.12	https://www.genecards.org/cgi-bin/carddisp.pl?gene=ENO2
HOTAIR	HOX Transcript Antisense RNA	RNA Gene	25	GC12M053962	12.03	https://www.genecards.org/cgi-bin/carddisp.pl?gene=HOTAIR
MYH11	Myosin Heavy Chain 11	Protein Coding	47	GC16M015704	11.98	https://www.genecards.org/cgi-bin/carddisp.pl?gene=MYH11
CHGA	Chromogranin A	Protein Coding	44	GC14P092923	11.97	https://www.genecards.org/cgi-bin/carddisp.pl?gene=CHGA
CALCA	Calcitonin Related Polypeptide Alpha	Protein Coding	44	GC11M014945	11.95	https://www.genecards.org/cgi-bin/carddisp.pl?gene=CALCA
MIR30D	MicroRNA 30d	RNA Gene	16	GC08M134804	11.93	https://www.genecards.org/cgi-bin/carddisp.pl?gene=MIR30D
GFAP	Glial Fibrillary Acidic Protein	Protein Coding	49	GC17M044905	11.9	https://www.genecards.org/cgi-bin/carddisp.pl?gene=GFAP
MMP7	Matrix Metallopeptidase 7	Protein Coding	49	GC11M102425	11.8	https://www.genecards.org/cgi-bin/carddisp.pl?gene=MMP7
MUC6	Mucin 6, Oligomeric Mucus/Gel-Forming	Protein Coding	39	GC11M001002	11.74	https://www.genecards.org/cgi-bin/carddisp.pl?gene=MUC6
TNFSF10	TNF Superfamily Member 10	Protein Coding	48	GC03M172505	11.7	https://www.genecards.org/cgi-bin/carddisp.pl?gene=TNFSF10
CDKN1C	Cyclin Dependent Kinase Inhibitor 1C	Protein Coding	48	GC11M002885	11.66	https://www.genecards.org/cgi-bin/carddisp.pl?gene=CDKN1C
MIR215	MicroRNA 215	RNA Gene	18	GC01M220117	11.65	https://www.genecards.org/cgi-bin/carddisp.pl?gene=MIR215
OTX2	Orthodenticle Homeobox 2	Protein Coding	46	GC14M056799	11.64	https://www.genecards.org/cgi-bin/carddisp.pl?gene=OTX2
RMRP	RNA Component Of Mitochondrial RNA Processing Endoribonuclease	RNA Gene	25	GC09M035655	11.63	https://www.genecards.org/cgi-bin/carddisp.pl?gene=RMRP
RARB	Retinoic Acid Receptor Beta	Protein Coding	51	GC03P025194	11.56	https://www.genecards.org/cgi-bin/carddisp.pl?gene=RARB
SERPINA3	Serpin Family A Member 3	Protein Coding	45	GC14P094612	11.42	https://www.genecards.org/cgi-bin/carddisp.pl?gene=SERPINA3
NOS2	Nitric Oxide Synthase 2	Protein Coding	50	GC17M027756	11.4	https://www.genecards.org/cgi-bin/carddisp.pl?gene=NOS2
LRP5	LDL Receptor Related Protein 5	Protein Coding	50	GC11P068298	11.4	https://www.genecards.org/cgi-bin/carddisp.pl?gene=LRP5
SST	Somatostatin	Protein Coding	43	GC03M187668	11.4	https://www.genecards.org/cgi-bin/carddisp.pl?gene=SST
MIR197	MicroRNA 197	RNA Gene	18	GC01P109549	11.38	https://www.genecards.org/cgi-bin/carddisp.pl?gene=MIR197
MIR326	MicroRNA 326	RNA Gene	20	GC11M075335	11.32	https://www.genecards.org/cgi-bin/carddisp.pl?gene=MIR326
PARP1	Poly(ADP-Ribose) Polymerase 1	Protein Coding	50	GC01M226360	11.32	https://www.genecards.org/cgi-bin/carddisp.pl?gene=PARP1
FGF7	Fibroblast Growth Factor 7	Protein Coding	43	GC15P049423	11.32	https://www.genecards.org/cgi-bin/carddisp.pl?gene=FGF7
MIR196B	MicroRNA 196b	RNA Gene	19	GC07M027167	11.2	https://www.genecards.org/cgi-bin/carddisp.pl?gene=MIR196B
PRKAR1A	Protein Kinase CAMP-Dependent Type I Regulatory Subunit Alpha	Protein Coding	53	GC17P068414	11.17	https://www.genecards.org/cgi-bin/carddisp.pl?gene=PRKAR1A
JUP	Junction Plakoglobin	Protein Coding	48	GC17M041754	11.15	https://www.genecards.org/cgi-bin/carddisp.pl?gene=JUP
SAG	S-Antigen Visual Arrestin	Protein Coding	47	GC02P233309	11.13	https://www.genecards.org/cgi-bin/carddisp.pl?gene=SAG
THBD	Thrombomodulin	Protein Coding	45	GC20M023026	11.11	https://www.genecards.org/cgi-bin/carddisp.pl?gene=THBD
SOD1	Superoxide Dismutase 1	Protein Coding	53	GC21P031659	11.07	https://www.genecards.org/cgi-bin/carddisp.pl?gene=SOD1
CDC73	Cell Division Cycle 73	Protein Coding	46	GC01P193090	10.98	https://www.genecards.org/cgi-bin/carddisp.pl?gene=CDC73
CEACAM5	CEA Cell Adhesion Molecule 5	Protein Coding	43	GC19P041709	10.97	https://www.genecards.org/cgi-bin/carddisp.pl?gene=CEACAM5
MIR324	MicroRNA 324	RNA Gene	18	GC17M007223	10.81	https://www.genecards.org/cgi-bin/carddisp.pl?gene=MIR324
MTOR	Mechanistic Target Of Rapamycin Kinase	Protein Coding	54	GC01M011106	10.78	https://www.genecards.org/cgi-bin/carddisp.pl?gene=MTOR
MAPRE2	Microtubule Associated Protein RP/EB Family Member 2	Protein Coding	42	GC18P034976	10.77	https://www.genecards.org/cgi-bin/carddisp.pl?gene=MAPRE2
FHIT	Fragile Histidine Triad Diadenosine Triphosphatase	Protein Coding	46	GC03M059747	10.69	https://www.genecards.org/cgi-bin/carddisp.pl?gene=FHIT
DSP	Desmoplakin	Protein Coding	51	GC06P007541	10.64	https://www.genecards.org/cgi-bin/carddisp.pl?gene=DSP
FGF2	Fibroblast Growth Factor 2	Protein Coding	49	GC04P122826	10.63	https://www.genecards.org/cgi-bin/carddisp.pl?gene=FGF2
IQGAP1	IQ Motif Containing GTPase Activating Protein 1	Protein Coding	45	GC15P090388	10.62	https://www.genecards.org/cgi-bin/carddisp.pl?gene=IQGAP1
GLI1	GLI Family Zinc Finger 1	Protein Coding	48	GC12P057460	10.52	https://www.genecards.org/cgi-bin/carddisp.pl?gene=GLI1
USF1	Upstream Transcription Factor 1	Protein Coding	44	GC01M161039	10.48	https://www.genecards.org/cgi-bin/carddisp.pl?gene=USF1
ACVRL1	Activin A Receptor Like Type 1	Protein Coding	51	GC12P051906	10.47	https://www.genecards.org/cgi-bin/carddisp.pl?gene=ACVRL1
FZD4	Frizzled Class Receptor 4	Protein Coding	52	GC11M086945	10.43	https://www.genecards.org/cgi-bin/carddisp.pl?gene=FZD4
NTF3	Neurotrophin 3	Protein Coding	45	GC12P005432	10.38	https://www.genecards.org/cgi-bin/carddisp.pl?gene=NTF3
TP73	Tumor Protein P73	Protein Coding	47	GC01P003652	10.35	https://www.genecards.org/cgi-bin/carddisp.pl?gene=TP73
NTRK2	Neurotrophic Receptor Tyrosine Kinase 2	Protein Coding	54	GC09P084668	10.32	https://www.genecards.org/cgi-bin/carddisp.pl?gene=NTRK2
TFF3	Trefoil Factor 3	Protein Coding	42	GC21M042311	10.25	https://www.genecards.org/cgi-bin/carddisp.pl?gene=TFF3
ATM	ATM Serine/Threonine Kinase	Protein Coding	54	GC11P108222	10.16	https://www.genecards.org/cgi-bin/carddisp.pl?gene=ATM
STAT1	Signal Transducer And Activator Of Transcription 1	Protein Coding	54	GC02M190964	10.14	https://www.genecards.org/cgi-bin/carddisp.pl?gene=STAT1
TFF1	Trefoil Factor 1	Protein Coding	46	GC21M042362	10.11	https://www.genecards.org/cgi-bin/carddisp.pl?gene=TFF1
CXCL8	C-X-C Motif Chemokine Ligand 8	Protein Coding	43	GC04P073740	10.07	https://www.genecards.org/cgi-bin/carddisp.pl?gene=CXCL8
CCAT1	Colon Cancer Associated Transcript 1	RNA Gene	15	GC08M127207	10.04	https://www.genecards.org/cgi-bin/carddisp.pl?gene=CCAT1
AFP	Alpha Fetoprotein	Protein Coding	47	GC04P073431	10.02	https://www.genecards.org/cgi-bin/carddisp.pl?gene=AFP
DKK1	Dickkopf WNT Signaling Pathway Inhibitor 1	Protein Coding	46	GC10P052314	9.97	https://www.genecards.org/cgi-bin/carddisp.pl?gene=DKK1
PTHLH	Parathyroid Hormone Like Hormone	Protein Coding	46	GC12M027959	9.87	https://www.genecards.org/cgi-bin/carddisp.pl?gene=PTHLH
SRGAP1	SLIT-ROBO Rho GTPase Activating Protein 1	Protein Coding	42	GC12P063844	9.81	https://www.genecards.org/cgi-bin/carddisp.pl?gene=SRGAP1
LGALS3	Galectin 3	Protein Coding	46	GC14P055124	9.75	https://www.genecards.org/cgi-bin/carddisp.pl?gene=LGALS3
LPL	Lipoprotein Lipase	Protein Coding	51	GC08P019901	9.74	https://www.genecards.org/cgi-bin/carddisp.pl?gene=LPL
NGFR	Nerve Growth Factor Receptor	Protein Coding	46	GC17P049495	9.71	https://www.genecards.org/cgi-bin/carddisp.pl?gene=NGFR
NME1	NME/NM23 Nucleoside Diphosphate Kinase 1	Protein Coding	50	GC17P051154	9.71	https://www.genecards.org/cgi-bin/carddisp.pl?gene=NME1
GAS5	Growth Arrest Specific 5	RNA Gene	22	GC01M174067	9.7	https://www.genecards.org/cgi-bin/carddisp.pl?gene=GAS5
CD36	CD36 Molecule	Protein Coding	50	GC07P080369	9.62	https://www.genecards.org/cgi-bin/carddisp.pl?gene=CD36
MALAT1	Metastasis Associated Lung Adenocarcinoma Transcript 1	RNA Gene	22	GC11P065562	9.6	https://www.genecards.org/cgi-bin/carddisp.pl?gene=MALAT1
TYMP	Thymidine Phosphorylase	Protein Coding	48	GC22M050525	9.54	https://www.genecards.org/cgi-bin/carddisp.pl?gene=TYMP
TOP2A	DNA Topoisomerase II Alpha	Protein Coding	52	GC17M040388	9.53	https://www.genecards.org/cgi-bin/carddisp.pl?gene=TOP2A
CRNDE	Colorectal Neoplasia Differentially Expressed	Protein Coding	20	GC16M054845	9.49	https://www.genecards.org/cgi-bin/carddisp.pl?gene=CRNDE
CFTR	CF Transmembrane Conductance Regulator	Protein Coding	52	GC07P117465	9.47	https://www.genecards.org/cgi-bin/carddisp.pl?gene=CFTR
FBXW7	F-Box And WD Repeat Domain Containing 7	Protein Coding	45	GC04M152321	9.41	https://www.genecards.org/cgi-bin/carddisp.pl?gene=FBXW7
NES	Nestin	Protein Coding	41	GC01M156668	9.37	https://www.genecards.org/cgi-bin/carddisp.pl?gene=NES
HOTTIP	HOXA Distal Transcript Antisense RNA	RNA Gene	21	GC07P027198	9.37	https://www.genecards.org/cgi-bin/carddisp.pl?gene=HOTTIP
TUG1	Taurine Up-Regulated 1	RNA Gene	23	GC22P030969	9.34	https://www.genecards.org/cgi-bin/carddisp.pl?gene=TUG1
NCAM1	Neural Cell Adhesion Molecule 1	Protein Coding	47	GC11P112961	9.31	https://www.genecards.org/cgi-bin/carddisp.pl?gene=NCAM1
MAP2	Microtubule Associated Protein 2	Protein Coding	44	GC02P209424	9.29	https://www.genecards.org/cgi-bin/carddisp.pl?gene=MAP2
CDC42	Cell Division Cycle 42	Protein Coding	53	GC01P022033	9.22	https://www.genecards.org/cgi-bin/carddisp.pl?gene=CDC42
NEAT1	Nuclear Paraspeckle Assembly Transcript 1	RNA Gene	22	GC11P065417	9.22	https://www.genecards.org/cgi-bin/carddisp.pl?gene=NEAT1
TCF7L2	Transcription Factor 7 Like 2	Protein Coding	48	GC10P112950	9.18	https://www.genecards.org/cgi-bin/carddisp.pl?gene=TCF7L2
NTRK3	Neurotrophic Receptor Tyrosine Kinase 3	Protein Coding	52	GC15M087859	9.14	https://www.genecards.org/cgi-bin/carddisp.pl?gene=NTRK3
RAC1	Rac Family Small GTPase 1	Protein Coding	51	GC07P006380	9.13	https://www.genecards.org/cgi-bin/carddisp.pl?gene=RAC1
MEG3	Maternally Expressed 3	RNA Gene	29	GC14P104069	9.13	https://www.genecards.org/cgi-bin/carddisp.pl?gene=MEG3
RUNX3	RUNX Family Transcription Factor 3	Protein Coding	44	GC01M024899	9.12	https://www.genecards.org/cgi-bin/carddisp.pl?gene=RUNX3
TH	Tyrosine Hydroxylase	Protein Coding	53	GC11M002163	9.04	https://www.genecards.org/cgi-bin/carddisp.pl?gene=TH
VEGFD	Vascular Endothelial Growth Factor D	Protein Coding	36	GC0XM015345	8.99	https://www.genecards.org/cgi-bin/carddisp.pl?gene=VEGFD
HULC	Hepatocellular Carcinoma Up-Regulated Long Non-Coding RNA	RNA Gene	20	GC06P008438	8.94	https://www.genecards.org/cgi-bin/carddisp.pl?gene=HULC
KRT20	Keratin 20	Protein Coding	42	GC17M040875	8.84	https://www.genecards.org/cgi-bin/carddisp.pl?gene=KRT20
FH	Fumarate Hydratase	Protein Coding	47	GC01M241499	8.8	https://www.genecards.org/cgi-bin/carddisp.pl?gene=FH
BUB1B	BUB1 Mitotic Checkpoint Serine/Threonine Kinase B	Protein Coding	50	GC15P040161	8.76	https://www.genecards.org/cgi-bin/carddisp.pl?gene=BUB1B
IFNG	Interferon Gamma	Protein Coding	49	GC12M068064	8.75	https://www.genecards.org/cgi-bin/carddisp.pl?gene=IFNG
ESR2	Estrogen Receptor 2	Protein Coding	50	GC14M064084	8.74	https://www.genecards.org/cgi-bin/carddisp.pl?gene=ESR2
LINC-ROR	Long Intergenic Non-Protein Coding RNA, Regulator Of Reprogramming	RNA Gene	15	GC18M057054	8.73	https://www.genecards.org/cgi-bin/carddisp.pl?gene=LINC-ROR
SSTR2	Somatostatin Receptor 2	Protein Coding	49	GC17P073165	8.73	https://www.genecards.org/cgi-bin/carddisp.pl?gene=SSTR2
MIAT	Myocardial Infarction Associated Transcript	RNA Gene	23	GC22P026646	8.71	https://www.genecards.org/cgi-bin/carddisp.pl?gene=MIAT
FYN	FYN Proto-Oncogene, Src Family Tyrosine Kinase	Protein Coding	49	GC06M111660	8.7	https://www.genecards.org/cgi-bin/carddisp.pl?gene=FYN
LIF	LIF Interleukin 6 Family Cytokine	Protein Coding	44	GC22M030240	8.62	https://www.genecards.org/cgi-bin/carddisp.pl?gene=LIF
PCNA	Proliferating Cell Nuclear Antigen	Protein Coding	52	GC20M005114	8.61	https://www.genecards.org/cgi-bin/carddisp.pl?gene=PCNA
CDH2	Cadherin 2	Protein Coding	51	GC18M027950	8.56	https://www.genecards.org/cgi-bin/carddisp.pl?gene=CDH2
RHOA	Ras Homolog Family Member A	Protein Coding	47	GC03M049359	8.55	https://www.genecards.org/cgi-bin/carddisp.pl?gene=RHOA
LYN	LYN Proto-Oncogene, Src Family Tyrosine Kinase	Protein Coding	51	GC08P055879	8.52	https://www.genecards.org/cgi-bin/carddisp.pl?gene=LYN
MAGEA1	MAGE Family Member A1	Protein Coding	40	GC0XP153179	8.52	https://www.genecards.org/cgi-bin/carddisp.pl?gene=MAGEA1
MPO	Myeloperoxidase	Protein Coding	51	GC17M058269	8.48	https://www.genecards.org/cgi-bin/carddisp.pl?gene=MPO
PTK2	Protein Tyrosine Kinase 2	Protein Coding	49	GC08M140657	8.47	https://www.genecards.org/cgi-bin/carddisp.pl?gene=PTK2
GH1	Growth Hormone 1	Protein Coding	46	GC17M063917	8.47	https://www.genecards.org/cgi-bin/carddisp.pl?gene=GH1
PVT1	Pvt1 Oncogene	RNA Gene	25	GC08P127806	8.43	https://www.genecards.org/cgi-bin/carddisp.pl?gene=PVT1
CDKN3	Cyclin Dependent Kinase Inhibitor 3	Protein Coding	42	GC14P054398	8.39	https://www.genecards.org/cgi-bin/carddisp.pl?gene=CDKN3
UCA1	Urothelial Cancer Associated 1	RNA Gene	22	GC19P015828	8.36	https://www.genecards.org/cgi-bin/carddisp.pl?gene=UCA1
TFF2	Trefoil Factor 2	Protein Coding	42	GC21M042346	8.26	https://www.genecards.org/cgi-bin/carddisp.pl?gene=TFF2
MIR346	MicroRNA 346	RNA Gene	18	GC10M086264	8.25	https://www.genecards.org/cgi-bin/carddisp.pl?gene=MIR346
PRKN	Parkin RBR E3 Ubiquitin Protein Ligase	Protein Coding	41	GC06M161348	8.21	https://www.genecards.org/cgi-bin/carddisp.pl?gene=PRKN
MAPRE3	Microtubule Associated Protein RP/EB Family Member 3	Protein Coding	39	GC02P026935	8.2	https://www.genecards.org/cgi-bin/carddisp.pl?gene=MAPRE3
RAF1	Raf-1 Proto-Oncogene, Serine/Threonine Kinase	Protein Coding	56	GC03M012583	8.2	https://www.genecards.org/cgi-bin/carddisp.pl?gene=RAF1
CLDN4	Claudin 4	Protein Coding	42	GC07P073799	8.18	https://www.genecards.org/cgi-bin/carddisp.pl?gene=CLDN4
SERPINB5	Serpin Family B Member 5	Protein Coding	45	GC18P063476	8.17	https://www.genecards.org/cgi-bin/carddisp.pl?gene=SERPINB5
TOP1	DNA Topoisomerase I	Protein Coding	48	GC20P041028	8.15	https://www.genecards.org/cgi-bin/carddisp.pl?gene=TOP1
FOS	Fos Proto-Oncogene, AP-1 Transcription Factor Subunit	Protein Coding	52	GC14P075278	8.14	https://www.genecards.org/cgi-bin/carddisp.pl?gene=FOS
SGK1	Serum/Glucocorticoid Regulated Kinase 1	Protein Coding	50	GC06M134169	8.12	https://www.genecards.org/cgi-bin/carddisp.pl?gene=SGK1
SPRY4-IT1	SPRY4 Intronic Transcript 1	RNA Gene	12	GC05U901574	8.05	https://www.genecards.org/cgi-bin/carddisp.pl?gene=SPRY4-IT1
IL4	Interleukin 4	Protein Coding	48	GC05P132673	8.04	https://www.genecards.org/cgi-bin/carddisp.pl?gene=IL4
CASC2	Cancer Susceptibility 2	RNA Gene	26	GC10P118046	8.01	https://www.genecards.org/cgi-bin/carddisp.pl?gene=CASC2
AR	Androgen Receptor	Protein Coding	54	GC0XP067544	8.01	https://www.genecards.org/cgi-bin/carddisp.pl?gene=AR
MIR191	MicroRNA 191	RNA Gene	19	GC03M049162	8.01	https://www.genecards.org/cgi-bin/carddisp.pl?gene=MIR191
MMP1	Matrix Metallopeptidase 1	Protein Coding	53	GC11M102810	8	https://www.genecards.org/cgi-bin/carddisp.pl?gene=MMP1
OR3A4P	Olfactory Receptor Family 3 Subfamily A Member 4 Pseudogene	Pseudogene	24	GC17P003310	7.95	https://www.genecards.org/cgi-bin/carddisp.pl?gene=OR3A4P
MSI1	Musashi RNA Binding Protein 1	Protein Coding	41	GC12M120341	7.94	https://www.genecards.org/cgi-bin/carddisp.pl?gene=MSI1
WNT9A	Wnt Family Member 9A	Protein Coding	42	GC01M227920	7.93	https://www.genecards.org/cgi-bin/carddisp.pl?gene=WNT9A
PLCG2	Phospholipase C Gamma 2	Protein Coding	52	GC16P081773	7.91	https://www.genecards.org/cgi-bin/carddisp.pl?gene=PLCG2
CDX1	Caudal Type Homeobox 1	Protein Coding	37	GC05P150133	7.87	https://www.genecards.org/cgi-bin/carddisp.pl?gene=CDX1
PIK3R1	Phosphoinositide-3-Kinase Regulatory Subunit 1	Protein Coding	52	GC05P068215	7.85	https://www.genecards.org/cgi-bin/carddisp.pl?gene=PIK3R1
VIM	Vimentin	Protein Coding	51	GC10P017227	7.85	https://www.genecards.org/cgi-bin/carddisp.pl?gene=VIM
KRT7	Keratin 7	Protein Coding	43	GC12P052232	7.84	https://www.genecards.org/cgi-bin/carddisp.pl?gene=KRT7
CCAT2	Colon Cancer Associated Transcript 2	RNA Gene	14	GC08P127400	7.84	https://www.genecards.org/cgi-bin/carddisp.pl?gene=CCAT2
KITLG	KIT Ligand	Protein Coding	45	GC12M088492	7.8	https://www.genecards.org/cgi-bin/carddisp.pl?gene=KITLG
STMN1	Stathmin 1	Protein Coding	46	GC01M025884	7.77	https://www.genecards.org/cgi-bin/carddisp.pl?gene=STMN1
DICER1	Dicer 1, Ribonuclease III	Protein Coding	49	GC14M095086	7.76	https://www.genecards.org/cgi-bin/carddisp.pl?gene=DICER1
S100A8	S100 Calcium Binding Protein A8	Protein Coding	44	GC01M153391	7.75	https://www.genecards.org/cgi-bin/carddisp.pl?gene=S100A8
WT1-AS	WT1 Antisense RNA	RNA Gene	24	GC11P032434	7.74	https://www.genecards.org/cgi-bin/carddisp.pl?gene=WT1-AS
SOX2-OT	SOX2 Overlapping Transcript	RNA Gene	20	GC03P180989	7.71	https://www.genecards.org/cgi-bin/carddisp.pl?gene=SOX2-OT
REEP5	Receptor Accessory Protein 5	Protein Coding	40	GC05M112876	7.71	https://www.genecards.org/cgi-bin/carddisp.pl?gene=REEP5
TGFB2	Transforming Growth Factor Beta 2	Protein Coding	51	GC01P218345	7.65	https://www.genecards.org/cgi-bin/carddisp.pl?gene=TGFB2
TP53COR1	Tumor Protein P53 Pathway Corepressor 1	RNA Gene	9	GC06U903133	7.65	https://www.genecards.org/cgi-bin/carddisp.pl?gene=TP53COR1
BMI1	BMI1 Proto-Oncogene, Polycomb Ring Finger	Protein Coding	45	GC10P022326	7.64	https://www.genecards.org/cgi-bin/carddisp.pl?gene=BMI1
DHFR	Dihydrofolate Reductase	Protein Coding	50	GC05M080626	7.64	https://www.genecards.org/cgi-bin/carddisp.pl?gene=DHFR
MYLK-AS1	MYLK Antisense RNA 1	RNA Gene	16	GC03P123588	7.63	https://www.genecards.org/cgi-bin/carddisp.pl?gene=MYLK-AS1
PGR	Progesterone Receptor	Protein Coding	51	GC11M100943	7.62	https://www.genecards.org/cgi-bin/carddisp.pl?gene=PGR
DNAH8	Dynein Axonemal Heavy Chain 8	Protein Coding	38	GC06P043390	7.59	https://www.genecards.org/cgi-bin/carddisp.pl?gene=DNAH8
ZFAS1	ZNFX1 Antisense RNA 1	RNA Gene	19	GC20P049276	7.58	https://www.genecards.org/cgi-bin/carddisp.pl?gene=ZFAS1
CYTOR	Cytoskeleton Regulator RNA	RNA Gene	17	GC02P087457	7.57	https://www.genecards.org/cgi-bin/carddisp.pl?gene=CYTOR
PRL	Prolactin	Protein Coding	44	GC06M022230	7.56	https://www.genecards.org/cgi-bin/carddisp.pl?gene=PRL
NFKB1	Nuclear Factor Kappa B Subunit 1	Protein Coding	54	GC04P102501	7.53	https://www.genecards.org/cgi-bin/carddisp.pl?gene=NFKB1
DANCR	Differentiation Antagonizing Non-Protein Coding RNA	RNA Gene	20	GC04P052712	7.5	https://www.genecards.org/cgi-bin/carddisp.pl?gene=DANCR
PSCA	Prostate Stem Cell Antigen	Protein Coding	40	GC08P142670	7.48	https://www.genecards.org/cgi-bin/carddisp.pl?gene=PSCA
PTENP1	Phosphatase And Tensin Homolog Pseudogene 1	Pseudogene	23	GC09M033673	7.42	https://www.genecards.org/cgi-bin/carddisp.pl?gene=PTENP1
LNCRNA-ATB	Long Noncoding RNA Activated By TGF-Beta	RNA Gene	4	GC14U902188	7.41	https://www.genecards.org/cgi-bin/carddisp.pl?gene=LNCRNA-ATB
MIR24-1	MicroRNA 24-1	RNA Gene	17	GC09P095086	7.37	https://www.genecards.org/cgi-bin/carddisp.pl?gene=MIR24-1
WNT6	Wnt Family Member 6	Protein Coding	44	GC02P218859	7.36	https://www.genecards.org/cgi-bin/carddisp.pl?gene=WNT6
EGOT	Eosinophil Granule Ontogeny Transcript	RNA Gene	20	GC03M004790	7.34	https://www.genecards.org/cgi-bin/carddisp.pl?gene=EGOT
SNHG15	Small Nucleolar RNA Host Gene 15	RNA Gene	18	GC07M044983	7.31	https://www.genecards.org/cgi-bin/carddisp.pl?gene=SNHG15
HES1	Hes Family BHLH Transcription Factor 1	Protein Coding	45	GC03P194136	7.3	https://www.genecards.org/cgi-bin/carddisp.pl?gene=HES1
TACC1	Transforming Acidic Coiled-Coil Containing Protein 1	Protein Coding	41	GC08P038728	7.28	https://www.genecards.org/cgi-bin/carddisp.pl?gene=TACC1
BANCR	BRAF-Activated Non-Protein Coding RNA	RNA Gene	12	GC09M069296	7.28	https://www.genecards.org/cgi-bin/carddisp.pl?gene=BANCR
RPS27A	Ribosomal Protein S27a	Protein Coding	44	GC02P055231	7.27	https://www.genecards.org/cgi-bin/carddisp.pl?gene=RPS27A
SPP1	Secreted Phosphoprotein 1	Protein Coding	47	GC04P087975	7.25	https://www.genecards.org/cgi-bin/carddisp.pl?gene=SPP1
MBD4	Methyl-CpG Binding Domain 4, DNA Glycosylase	Protein Coding	43	GC03M129430	7.24	https://www.genecards.org/cgi-bin/carddisp.pl?gene=MBD4
LOX	Lysyl Oxidase	Protein Coding	46	GC05M122063	7.23	https://www.genecards.org/cgi-bin/carddisp.pl?gene=LOX
HAGLR	HOXD Antisense Growth-Associated Long Non-Coding RNA	RNA Gene	16	GC02M176173	7.23	https://www.genecards.org/cgi-bin/carddisp.pl?gene=HAGLR
CCKBR	Cholecystokinin B Receptor	Protein Coding	46	GC11P006259	7.23	https://www.genecards.org/cgi-bin/carddisp.pl?gene=CCKBR
HOXA11-AS	HOXA11 Antisense RNA	RNA Gene	19	GC07P027184	7.2	https://www.genecards.org/cgi-bin/carddisp.pl?gene=HOXA11-AS
SNHG16	Small Nucleolar RNA Host Gene 16	RNA Gene	16	GC17P076559	7.19	https://www.genecards.org/cgi-bin/carddisp.pl?gene=SNHG16
CACYBP	Calcyclin Binding Protein	Protein Coding	41	GC01P174968	7.19	https://www.genecards.org/cgi-bin/carddisp.pl?gene=CACYBP
WNT2B	Wnt Family Member 2B	Protein Coding	46	GC01P112466	7.18	https://www.genecards.org/cgi-bin/carddisp.pl?gene=WNT2B
EPAS1	Endothelial PAS Domain Protein 1	Protein Coding	49	GC02P046293	7.16	https://www.genecards.org/cgi-bin/carddisp.pl?gene=EPAS1
UGT1A1	UDP Glucuronosyltransferase Family 1 Member A1	Protein Coding	49	GC02P233760	7.09	https://www.genecards.org/cgi-bin/carddisp.pl?gene=UGT1A1
MIR24-2	MicroRNA 24-2	RNA Gene	17	GC19M013963	7.07	https://www.genecards.org/cgi-bin/carddisp.pl?gene=MIR24-2
PANDAR	Promoter Of CDKN1A Antisense DNA Damage Activated RNA	RNA Gene	12	GC06M036673	7.07	https://www.genecards.org/cgi-bin/carddisp.pl?gene=PANDAR
LINC01772	Long Intergenic Non-Protein Coding RNA 1772	RNA Gene	11	GC01P016465	7.07	https://www.genecards.org/cgi-bin/carddisp.pl?gene=LINC01772
HSPG2	Heparan Sulfate Proteoglycan 2	Protein Coding	48	GC01M021822	7.07	https://www.genecards.org/cgi-bin/carddisp.pl?gene=HSPG2
MIR92A2	MicroRNA 92a-2	RNA Gene	14	GC0XM134235	7.05	https://www.genecards.org/cgi-bin/carddisp.pl?gene=MIR92A2
SERPINE1	Serpin Family E Member 1	Protein Coding	52	GC07P101127	7.03	https://www.genecards.org/cgi-bin/carddisp.pl?gene=SERPINE1
SOX2	SRY-Box Transcription Factor 2	Protein Coding	48	GC03P181711	7.01	https://www.genecards.org/cgi-bin/carddisp.pl?gene=SOX2
MCM5	Minichromosome Maintenance Complex Component 5	Protein Coding	45	GC22P035400	6.98	https://www.genecards.org/cgi-bin/carddisp.pl?gene=MCM5
HIF1A-AS2	HIF1A Antisense RNA 2	RNA Gene	15	GC14M061715	6.97	https://www.genecards.org/cgi-bin/carddisp.pl?gene=HIF1A-AS2
BCAR4	Breast Cancer Anti-Estrogen Resistance 4	RNA Gene	17	GC16M011819	6.97	https://www.genecards.org/cgi-bin/carddisp.pl?gene=BCAR4
DLEU1	Deleted In Lymphocytic Leukemia 1	RNA Gene	28	GC13P050084	6.93	https://www.genecards.org/cgi-bin/carddisp.pl?gene=DLEU1
KRT8	Keratin 8	Protein Coding	48	GC12M052897	6.93	https://www.genecards.org/cgi-bin/carddisp.pl?gene=KRT8
SNHG1	Small Nucleolar RNA Host Gene 1	RNA Gene	20	GC11M063021	6.92	https://www.genecards.org/cgi-bin/carddisp.pl?gene=SNHG1
CYP1B1	Cytochrome P450 Family 1 Subfamily B Member 1	Protein Coding	50	GC02M038034	6.91	https://www.genecards.org/cgi-bin/carddisp.pl?gene=CYP1B1
ERVH48-1	Endogenous Retrovirus Group 48 Member 1	Protein Coding	16	GC21M042916	6.91	https://www.genecards.org/cgi-bin/carddisp.pl?gene=ERVH48-1
HOXA-AS2	HOXA Cluster Antisense RNA 2	RNA Gene	17	GC07P027107	6.89	https://www.genecards.org/cgi-bin/carddisp.pl?gene=HOXA-AS2
BMPR2	Bone Morphogenetic Protein Receptor Type 2	Protein Coding	50	GC02P202376	6.84	https://www.genecards.org/cgi-bin/carddisp.pl?gene=BMPR2
IL10	Interleukin 10	Protein Coding	48	GC01M206767	6.83	https://www.genecards.org/cgi-bin/carddisp.pl?gene=IL10
CNTN2	Contactin 2	Protein Coding	48	GC01P205043	6.83	https://www.genecards.org/cgi-bin/carddisp.pl?gene=CNTN2
LINC00901	Long Intergenic Non-Protein Coding RNA 901	RNA Gene	13	GC03P116922	6.82	https://www.genecards.org/cgi-bin/carddisp.pl?gene=LINC00901
KMT2D	Lysine Methyltransferase 2D	Protein Coding	42	GC12M049018	6.81	https://www.genecards.org/cgi-bin/carddisp.pl?gene=KMT2D
MAPK8	Mitogen-Activated Protein Kinase 8	Protein Coding	51	GC10P048306	6.81	https://www.genecards.org/cgi-bin/carddisp.pl?gene=MAPK8
IFNB1	Interferon Beta 1	Protein Coding	42	GC09M021077	6.81	https://www.genecards.org/cgi-bin/carddisp.pl?gene=IFNB1
LINC01234	Long Intergenic Non-Protein Coding RNA 1234	RNA Gene	16	GC12M113584	6.8	https://www.genecards.org/cgi-bin/carddisp.pl?gene=LINC01234
KCNH2	Potassium Voltage-Gated Channel Subfamily H Member 2	Protein Coding	51	GC07M150944	6.8	https://www.genecards.org/cgi-bin/carddisp.pl?gene=KCNH2
EPO	Erythropoietin	Protein Coding	43	GC07P100720	6.79	https://www.genecards.org/cgi-bin/carddisp.pl?gene=EPO
PAX5	Paired Box 5	Protein Coding	48	GC09M036828	6.79	https://www.genecards.org/cgi-bin/carddisp.pl?gene=PAX5
CAV1	Caveolin 1	Protein Coding	49	GC07P116524	6.79	https://www.genecards.org/cgi-bin/carddisp.pl?gene=CAV1
SNHG7	Small Nucleolar RNA Host Gene 7	RNA Gene	20	GC09M136721	6.77	https://www.genecards.org/cgi-bin/carddisp.pl?gene=SNHG7
LINC00052	Long Intergenic Non-Protein Coding RNA 52	RNA Gene	19	GC15P087576	6.77	https://www.genecards.org/cgi-bin/carddisp.pl?gene=LINC00052
LINC00628	Long Intergenic Non-Protein Coding RNA 628	RNA Gene	13	GC01M204371	6.77	https://www.genecards.org/cgi-bin/carddisp.pl?gene=LINC00628
AMER1	APC Membrane Recruitment Protein 1	Protein Coding	38	GC0XM064185	6.77	https://www.genecards.org/cgi-bin/carddisp.pl?gene=AMER1
HAGLROS	HAGLR Opposite Strand LncRNA	RNA Gene	14	GC02P176177	6.76	https://www.genecards.org/cgi-bin/carddisp.pl?gene=HAGLROS
ACE	Angiotensin I Converting Enzyme	Protein Coding	50	GC17P063477	6.75	https://www.genecards.org/cgi-bin/carddisp.pl?gene=ACE
INSR	Insulin Receptor	Protein Coding	55	GC19M007112	6.73	https://www.genecards.org/cgi-bin/carddisp.pl?gene=INSR
PCAT1	Prostate Cancer Associated Transcript 1	RNA Gene	17	GC08P126553	6.71	https://www.genecards.org/cgi-bin/carddisp.pl?gene=PCAT1
PIK3CG	Phosphatidylinositol-4,5-Bisphosphate 3-Kinase Catalytic Subunit Gamma	Protein Coding	49	GC07P106865	6.71	https://www.genecards.org/cgi-bin/carddisp.pl?gene=PIK3CG
FAS	Fas Cell Surface Death Receptor	Protein Coding	51	GC10P088969	6.71	https://www.genecards.org/cgi-bin/carddisp.pl?gene=FAS
PTPN11	Protein Tyrosine Phosphatase Non-Receptor Type 11	Protein Coding	53	GC12P112418	6.7	https://www.genecards.org/cgi-bin/carddisp.pl?gene=PTPN11
HFE	Homeostatic Iron Regulator	Protein Coding	45	GC06P026087	6.69	https://www.genecards.org/cgi-bin/carddisp.pl?gene=HFE
SMAD7	SMAD Family Member 7	Protein Coding	44	GC18M048919	6.68	https://www.genecards.org/cgi-bin/carddisp.pl?gene=SMAD7
ZIC1	Zic Family Member 1	Protein Coding	46	GC03P147393	6.62	https://www.genecards.org/cgi-bin/carddisp.pl?gene=ZIC1
HNF1A-AS1	HNF1A Antisense RNA 1	RNA Gene	18	GC12M120991	6.6	https://www.genecards.org/cgi-bin/carddisp.pl?gene=HNF1A-AS1
GNRH1	Gonadotropin Releasing Hormone 1	Protein Coding	43	GC08M025419	6.59	https://www.genecards.org/cgi-bin/carddisp.pl?gene=GNRH1
LEF1	Lymphoid Enhancer Binding Factor 1	Protein Coding	48	GC04M108047	6.59	https://www.genecards.org/cgi-bin/carddisp.pl?gene=LEF1
KRT19	Keratin 19	Protein Coding	46	GC17M041523	6.59	https://www.genecards.org/cgi-bin/carddisp.pl?gene=KRT19
DUXAP9	Double Homeobox A Pseudogene 9	Pseudogene	10	GC14P019209	6.58	https://www.genecards.org/cgi-bin/carddisp.pl?gene=DUXAP9
AFAP1-AS1	AFAP1 Antisense RNA 1	RNA Gene	15	GC04P007756	6.57	https://www.genecards.org/cgi-bin/carddisp.pl?gene=AFAP1-AS1
TYK2	Tyrosine Kinase 2	Protein Coding	54	GC19M010350	6.57	https://www.genecards.org/cgi-bin/carddisp.pl?gene=TYK2
SNAI1	Snail Family Transcriptional Repressor 1	Protein Coding	45	GC20P049982	6.55	https://www.genecards.org/cgi-bin/carddisp.pl?gene=SNAI1
TPO	Thyroid Peroxidase	Protein Coding	49	GC02P001374	6.54	https://www.genecards.org/cgi-bin/carddisp.pl?gene=TPO
DAB2IP	DAB2 Interacting Protein	Protein Coding	41	GC09P121566	6.51	https://www.genecards.org/cgi-bin/carddisp.pl?gene=DAB2IP
CSNK1D	Casein Kinase 1 Delta	Protein Coding	51	GC17M082239	6.51	https://www.genecards.org/cgi-bin/carddisp.pl?gene=CSNK1D
E2F1	E2F Transcription Factor 1	Protein Coding	45	GC20M033675	6.51	https://www.genecards.org/cgi-bin/carddisp.pl?gene=E2F1
TCF4	Transcription Factor 4	Protein Coding	48	GC18M055222	6.47	https://www.genecards.org/cgi-bin/carddisp.pl?gene=TCF4
GHET1	Gastric Carcinoma Proliferation Enhancing Transcript 1	RNA Gene	12	GC07P149017	6.46	https://www.genecards.org/cgi-bin/carddisp.pl?gene=GHET1
HIC1	HIC ZBTB Transcriptional Repressor 1	Protein Coding	42	GC17P002054	6.46	https://www.genecards.org/cgi-bin/carddisp.pl?gene=HIC1
HOXA13	Homeobox A13	Protein Coding	44	GC07M027200	6.45	https://www.genecards.org/cgi-bin/carddisp.pl?gene=HOXA13
SNHG5	Small Nucleolar RNA Host Gene 5	RNA Gene	20	GC06M085650	6.45	https://www.genecards.org/cgi-bin/carddisp.pl?gene=SNHG5
CASP1	Caspase 1	Protein Coding	51	GC11M105025	6.44	https://www.genecards.org/cgi-bin/carddisp.pl?gene=CASP1
F5	Coagulation Factor V	Protein Coding	47	GC01M169511	6.44	https://www.genecards.org/cgi-bin/carddisp.pl?gene=F5
PRNCR1	Prostate Cancer Associated Non-Coding RNA 1	RNA Gene	14	GC08P127079	6.42	https://www.genecards.org/cgi-bin/carddisp.pl?gene=PRNCR1
NOS3	Nitric Oxide Synthase 3	Protein Coding	52	GC07P150990	6.41	https://www.genecards.org/cgi-bin/carddisp.pl?gene=NOS3
PTK2B	Protein Tyrosine Kinase 2 Beta	Protein Coding	50	GC08P027311	6.39	https://www.genecards.org/cgi-bin/carddisp.pl?gene=PTK2B
IL4R	Interleukin 4 Receptor	Protein Coding	49	GC16P027325	6.39	https://www.genecards.org/cgi-bin/carddisp.pl?gene=IL4R
DSC2	Desmocollin 2	Protein Coding	47	GC18M031058	6.39	https://www.genecards.org/cgi-bin/carddisp.pl?gene=DSC2
CBR3-AS1	CBR3 Antisense RNA 1	RNA Gene	16	GC21M036131	6.37	https://www.genecards.org/cgi-bin/carddisp.pl?gene=CBR3-AS1
CREB1	CAMP Responsive Element Binding Protein 1	Protein Coding	50	GC02P207529	6.37	https://www.genecards.org/cgi-bin/carddisp.pl?gene=CREB1
REG4	Regenerating Family Member 4	Protein Coding	41	GC01M119794	6.35	https://www.genecards.org/cgi-bin/carddisp.pl?gene=REG4
CAT	Catalase	Protein Coding	51	GC11P034460	6.35	https://www.genecards.org/cgi-bin/carddisp.pl?gene=CAT
ACTA1	Actin Alpha 1, Skeletal Muscle	Protein Coding	48	GC01M229431	6.35	https://www.genecards.org/cgi-bin/carddisp.pl?gene=ACTA1
CSF1R	Colony Stimulating Factor 1 Receptor	Protein Coding	53	GC05M150053	6.35	https://www.genecards.org/cgi-bin/carddisp.pl?gene=CSF1R
LINC00261	Long Intergenic Non-Protein Coding RNA 261	RNA Gene	19	GC20M022547	6.34	https://www.genecards.org/cgi-bin/carddisp.pl?gene=LINC00261
COL1A1	Collagen Type I Alpha 1 Chain	Protein Coding	52	GC17M050183	6.34	https://www.genecards.org/cgi-bin/carddisp.pl?gene=COL1A1
EP300	E1A Binding Protein P300	Protein Coding	52	GC22P041091	6.31	https://www.genecards.org/cgi-bin/carddisp.pl?gene=EP300
LEP	Leptin	Protein Coding	49	GC07P128241	6.31	https://www.genecards.org/cgi-bin/carddisp.pl?gene=LEP
FENDRR	FOXF1 Adjacent Non-Coding Developmental Regulatory RNA	RNA Gene	18	GC16M086511	6.3	https://www.genecards.org/cgi-bin/carddisp.pl?gene=FENDRR
VIP	Vasoactive Intestinal Peptide	Protein Coding	45	GC06P152750	6.28	https://www.genecards.org/cgi-bin/carddisp.pl?gene=VIP
TLR2	Toll Like Receptor 2	Protein Coding	52	GC04P153684	6.25	https://www.genecards.org/cgi-bin/carddisp.pl?gene=TLR2
GFI1	Growth Factor Independent 1 Transcriptional Repressor	Protein Coding	44	GC01M092474	6.25	https://www.genecards.org/cgi-bin/carddisp.pl?gene=GFI1
LINC00673	Long Intergenic Non-Protein Coding RNA 673	RNA Gene	15	GC17M072290	6.21	https://www.genecards.org/cgi-bin/carddisp.pl?gene=LINC00673
FER1L4	Fer-1 Like Family Member 4 (Pseudogene)	Pseudogene	25	GC20M035558	6.2	https://www.genecards.org/cgi-bin/carddisp.pl?gene=FER1L4
GACAT2	Gastric Cancer Associated Transcript 2	RNA Gene	15	GC18M008695	6.19	https://www.genecards.org/cgi-bin/carddisp.pl?gene=GACAT2
S100A6	S100 Calcium Binding Protein A6	Protein Coding	44	GC01M153535	6.19	https://www.genecards.org/cgi-bin/carddisp.pl?gene=S100A6
MYH1	Myosin Heavy Chain 1	Protein Coding	41	GC17M010492	6.16	https://www.genecards.org/cgi-bin/carddisp.pl?gene=MYH1
AKR7L	Aldo-Keto Reductase Family 7 Like (Gene/Pseudogene)	Protein Coding	30	GC01M019265	6.13	https://www.genecards.org/cgi-bin/carddisp.pl?gene=AKR7L
CNDP2	Carnosine Dipeptidase 2	Protein Coding	44	GC18P074495	6.1	https://www.genecards.org/cgi-bin/carddisp.pl?gene=CNDP2
CTNNBIP1	Catenin Beta Interacting Protein 1	Protein Coding	41	GC01M009848	6.08	https://www.genecards.org/cgi-bin/carddisp.pl?gene=CTNNBIP1
ADRB2	Adrenoceptor Beta 2	Protein Coding	50	GC05P148825	6.07	https://www.genecards.org/cgi-bin/carddisp.pl?gene=ADRB2
ABL1	ABL Proto-Oncogene 1, Non-Receptor Tyrosine Kinase	Protein Coding	54	GC09P130713	6.07	https://www.genecards.org/cgi-bin/carddisp.pl?gene=ABL1
MIR31HG	MIR31 Host Gene	RNA Gene	18	GC09M021411	6.04	https://www.genecards.org/cgi-bin/carddisp.pl?gene=MIR31HG
PRKACA	Protein Kinase CAMP-Activated Catalytic Subunit Alpha	Protein Coding	53	GC19M014092	6.03	https://www.genecards.org/cgi-bin/carddisp.pl?gene=PRKACA
PWRN1	Prader-Willi Region Non-Protein Coding RNA 1	RNA Gene	18	GC15P024395	6	https://www.genecards.org/cgi-bin/carddisp.pl?gene=PWRN1
FOXO1	Forkhead Box O1	Protein Coding	49	GC13M040555	5.97	https://www.genecards.org/cgi-bin/carddisp.pl?gene=FOXO1
PDGFC	Platelet Derived Growth Factor C	Protein Coding	45	GC04M156760	5.97	https://www.genecards.org/cgi-bin/carddisp.pl?gene=PDGFC
SNHG12	Small Nucleolar RNA Host Gene 12	RNA Gene	22	GC01M028578	5.96	https://www.genecards.org/cgi-bin/carddisp.pl?gene=SNHG12
TUSC7	Tumor Suppressor Candidate 7	RNA Gene	16	GC03P116709	5.96	https://www.genecards.org/cgi-bin/carddisp.pl?gene=TUSC7
TLR4	Toll Like Receptor 4	Protein Coding	52	GC09P117704	5.95	https://www.genecards.org/cgi-bin/carddisp.pl?gene=TLR4
ZEB1-AS1	ZEB1 Antisense RNA 1	RNA Gene	16	GC10M031166	5.94	https://www.genecards.org/cgi-bin/carddisp.pl?gene=ZEB1-AS1
BLACAT1	Bladder Cancer Associated Transcript 1	RNA Gene	15	GC01M205434	5.92	https://www.genecards.org/cgi-bin/carddisp.pl?gene=BLACAT1
MBL2	Mannose Binding Lectin 2	Protein Coding	48	GC10M052760	5.91	https://www.genecards.org/cgi-bin/carddisp.pl?gene=MBL2
NAT2	N-Acetyltransferase 2	Protein Coding	44	GC08P018391	5.91	https://www.genecards.org/cgi-bin/carddisp.pl?gene=NAT2
DSG2	Desmoglein 2	Protein Coding	46	GC18P031498	5.9	https://www.genecards.org/cgi-bin/carddisp.pl?gene=DSG2
CAPN9	Calpain 9	Protein Coding	44	GC01P230747	5.9	https://www.genecards.org/cgi-bin/carddisp.pl?gene=CAPN9
DLG1	Discs Large MAGUK Scaffold Protein 1	Protein Coding	44	GC03M197042	5.89	https://www.genecards.org/cgi-bin/carddisp.pl?gene=DLG1
NR1H4	Nuclear Receptor Subfamily 1 Group H Member 4	Protein Coding	49	GC12P100473	5.89	https://www.genecards.org/cgi-bin/carddisp.pl?gene=NR1H4
MACROH2A1	MacroH2A.1 Histone	Protein Coding	34	GC05M135334	5.89	https://www.genecards.org/cgi-bin/carddisp.pl?gene=MACROH2A1
PRSS21	Serine Protease 21	Protein Coding	42	GC16P003877	5.88	https://www.genecards.org/cgi-bin/carddisp.pl?gene=PRSS21
GALNT12	Polypeptide N-Acetylgalactosaminyltransferase 12	Protein Coding	43	GC09P098807	5.86	https://www.genecards.org/cgi-bin/carddisp.pl?gene=GALNT12
SMPD1	Sphingomyelin Phosphodiesterase 1	Protein Coding	49	GC11P006390	5.84	https://www.genecards.org/cgi-bin/carddisp.pl?gene=SMPD1
ICAM1	Intercellular Adhesion Molecule 1	Protein Coding	52	GC19P010270	5.83	https://www.genecards.org/cgi-bin/carddisp.pl?gene=ICAM1
BTRC	Beta-Transducin Repeat Containing E3 Ubiquitin Protein Ligase	Protein Coding	47	GC10P101354	5.83	https://www.genecards.org/cgi-bin/carddisp.pl?gene=BTRC
TINCR	TINCR Ubiquitin Domain Containing	RNA Gene	23	GC19M005558	5.81	https://www.genecards.org/cgi-bin/carddisp.pl?gene=TINCR
TIMP1	TIMP Metallopeptidase Inhibitor 1	Protein Coding	46	GC0XP047583	5.81	https://www.genecards.org/cgi-bin/carddisp.pl?gene=TIMP1
DMTF1	Cyclin D Binding Myb Like Transcription Factor 1	Protein Coding	36	GC07P087155	5.81	https://www.genecards.org/cgi-bin/carddisp.pl?gene=DMTF1
NPTN-IT1	NPTN Intronic Transcript 1	RNA Gene	12	GC15M073566	5.81	https://www.genecards.org/cgi-bin/carddisp.pl?gene=NPTN-IT1
MAPK14	Mitogen-Activated Protein Kinase 14	Protein Coding	53	GC06P043356	5.81	https://www.genecards.org/cgi-bin/carddisp.pl?gene=MAPK14
UMPS	Uridine Monophosphate Synthetase	Protein Coding	46	GC03P124730	5.79	https://www.genecards.org/cgi-bin/carddisp.pl?gene=UMPS
SNHG20	Small Nucleolar RNA Host Gene 20	RNA Gene	16	GC17P077087	5.79	https://www.genecards.org/cgi-bin/carddisp.pl?gene=SNHG20
RIOX2	Ribosomal Oxygenase 2	Protein Coding	33	GC03M097942	5.78	https://www.genecards.org/cgi-bin/carddisp.pl?gene=RIOX2
CDH17	Cadherin 17	Protein Coding	42	GC08M094127	5.77	https://www.genecards.org/cgi-bin/carddisp.pl?gene=CDH17
TNFRSF11A	TNF Receptor Superfamily Member 11a	Protein Coding	48	GC18P062325	5.77	https://www.genecards.org/cgi-bin/carddisp.pl?gene=TNFRSF11A
GSTT1	Glutathione S-Transferase Theta 1	Protein Coding	34	GC22Mi00270	5.76	https://www.genecards.org/cgi-bin/carddisp.pl?gene=GSTT1
ENTPD1-AS1	ENTPD1 Antisense RNA 1	RNA Gene	15	GC10M095753	5.76	https://www.genecards.org/cgi-bin/carddisp.pl?gene=ENTPD1-AS1
RELA	RELA Proto-Oncogene, NF-KB Subunit	Protein Coding	51	GC11M065653	5.74	https://www.genecards.org/cgi-bin/carddisp.pl?gene=RELA
ILK	Integrin Linked Kinase	Protein Coding	48	GC11P006581	5.74	https://www.genecards.org/cgi-bin/carddisp.pl?gene=ILK
LINC01194	Long Intergenic Non-Protein Coding RNA 1194	RNA Gene	17	GC05P012578	5.73	https://www.genecards.org/cgi-bin/carddisp.pl?gene=LINC01194
GKN2	Gastrokine 2	Protein Coding	36	GC02M068908	5.73	https://www.genecards.org/cgi-bin/carddisp.pl?gene=GKN2
ENSG00000278769		RNA Gene	4	GC15P042724	5.73	https://www.genecards.org/cgi-bin/carddisp.pl?gene=ENSG00000278769
FUT4	Fucosyltransferase 4	Protein Coding	38	GC11P094544	5.72	https://www.genecards.org/cgi-bin/carddisp.pl?gene=FUT4
CDK1	Cyclin Dependent Kinase 1	Protein Coding	47	GC10P060772	5.72	https://www.genecards.org/cgi-bin/carddisp.pl?gene=CDK1
KLF4	Kruppel Like Factor 4	Protein Coding	47	GC09M107484	5.72	https://www.genecards.org/cgi-bin/carddisp.pl?gene=KLF4
CTNND1	Catenin Delta 1	Protein Coding	47	GC11P057765	5.69	https://www.genecards.org/cgi-bin/carddisp.pl?gene=CTNND1
PKD1	Polycystin 1, Transient Receptor Potential Channel Interacting	Protein Coding	46	GC16M002133	5.69	https://www.genecards.org/cgi-bin/carddisp.pl?gene=PKD1
CEBPA-DT	CEBPA Divergent Transcript	RNA Gene	14	GC19P033303	5.69	https://www.genecards.org/cgi-bin/carddisp.pl?gene=CEBPA-DT
CYP1A2	Cytochrome P450 Family 1 Subfamily A Member 2	Protein Coding	46	GC15P074748	5.67	https://www.genecards.org/cgi-bin/carddisp.pl?gene=CYP1A2
TDRG1	Testis Development Related 1	RNA Gene	23	GC06P043407	5.66	https://www.genecards.org/cgi-bin/carddisp.pl?gene=TDRG1
ABHD11-AS1	ABHD11 Antisense RNA 1 (Tail To Tail)	RNA Gene	15	GC07P073735	5.66	https://www.genecards.org/cgi-bin/carddisp.pl?gene=ABHD11-AS1
ATOH1	Atonal BHLH Transcription Factor 1	Protein Coding	38	GC04P093828	5.66	https://www.genecards.org/cgi-bin/carddisp.pl?gene=ATOH1
FEZF1-AS1	FEZF1 Antisense RNA 1	RNA Gene	16	GC07P122303	5.65	https://www.genecards.org/cgi-bin/carddisp.pl?gene=FEZF1-AS1
SUMO1P3	SUMO1 Pseudogene 3	Pseudogene	13	GC01P160317	5.63	https://www.genecards.org/cgi-bin/carddisp.pl?gene=SUMO1P3
GAPLINC	Gastric Adenocarcinoma Associated, Positive CD44 Regulator, Long Intergenic Non-Coding RNA	RNA Gene	14	GC18P003467	5.62	https://www.genecards.org/cgi-bin/carddisp.pl?gene=GAPLINC
SFTA1P	Surfactant Associated 1, Pseudogene	Pseudogene	17	GC10M010784	5.61	https://www.genecards.org/cgi-bin/carddisp.pl?gene=SFTA1P
TRERNA1	Translation Regulatory Long Non-Coding RNA 1	RNA Gene	14	GC20M050040	5.6	https://www.genecards.org/cgi-bin/carddisp.pl?gene=TRERNA1
ANXA2P2	Annexin A2 Pseudogene 2	Pseudogene	24	GC09P034380	5.59	https://www.genecards.org/cgi-bin/carddisp.pl?gene=ANXA2P2
TMEM238L	Transmembrane Protein 238 Like	RNA Gene	15	GC17M010795	5.59	https://www.genecards.org/cgi-bin/carddisp.pl?gene=TMEM238L
SNHG6	Small Nucleolar RNA Host Gene 6	RNA Gene	16	GC08M066921	5.58	https://www.genecards.org/cgi-bin/carddisp.pl?gene=SNHG6
TFAP2A	Transcription Factor AP-2 Alpha	Protein Coding	48	GC06M010393	5.58	https://www.genecards.org/cgi-bin/carddisp.pl?gene=TFAP2A
MSTO2P	Misato Family Member 2, Pseudogene	Pseudogene	15	GC01P155745	5.58	https://www.genecards.org/cgi-bin/carddisp.pl?gene=MSTO2P
GPR65	G Protein-Coupled Receptor 65	Protein Coding	40	GC14P088005	5.57	https://www.genecards.org/cgi-bin/carddisp.pl?gene=GPR65
BUB1	BUB1 Mitotic Checkpoint Serine/Threonine Kinase	Protein Coding	50	GC02M110637	5.56	https://www.genecards.org/cgi-bin/carddisp.pl?gene=BUB1
HPSE	Heparanase	Protein Coding	46	GC04M083292	5.56	https://www.genecards.org/cgi-bin/carddisp.pl?gene=HPSE
RPL34-AS1	RPL34 Antisense RNA 1 (Head To Head)	RNA Gene	18	GC04M108538	5.55	https://www.genecards.org/cgi-bin/carddisp.pl?gene=RPL34-AS1
GACAT3	Gastric Cancer Associated Transcript 3	RNA Gene	14	GC02P016050	5.55	https://www.genecards.org/cgi-bin/carddisp.pl?gene=GACAT3
CASC9	Cancer Susceptibility 9	RNA Gene	14	GC08M075132	5.55	https://www.genecards.org/cgi-bin/carddisp.pl?gene=CASC9
GATA6-AS1	GATA6 Antisense RNA 1 (Head To Head)	RNA Gene	14	GC18M022166	5.55	https://www.genecards.org/cgi-bin/carddisp.pl?gene=GATA6-AS1
MDC1-AS1	MDC1 Antisense RNA 1	RNA Gene	13	GC06P032581	5.55	https://www.genecards.org/cgi-bin/carddisp.pl?gene=MDC1-AS1
NCRUPAR	Non-Protein Coding RNA, Upstream Of F2R/PAR1	RNA Gene	12	GC05P076711	5.55	https://www.genecards.org/cgi-bin/carddisp.pl?gene=NCRUPAR
LOC105372446	Uncharacterized LOC105372446	RNA Gene	5	GC19P051395	5.55	https://www.genecards.org/cgi-bin/carddisp.pl?gene=LOC105372446
EPHB2	EPH Receptor B2	Protein Coding	52	GC01P022710	5.55	https://www.genecards.org/cgi-bin/carddisp.pl?gene=EPHB2
CASP7	Caspase 7	Protein Coding	51	GC10P113679	5.55	https://www.genecards.org/cgi-bin/carddisp.pl?gene=CASP7
DUXAP8	Double Homeobox A Pseudogene 8	Pseudogene	11	GC22P015784	5.55	https://www.genecards.org/cgi-bin/carddisp.pl?gene=DUXAP8
MIR423	MicroRNA 423	RNA Gene	17	GC17P030117	5.54	https://www.genecards.org/cgi-bin/carddisp.pl?gene=MIR423
CDH3	Cadherin 3	Protein Coding	49	GC16P068637	5.53	https://www.genecards.org/cgi-bin/carddisp.pl?gene=CDH3
MT1DP	Metallothionein 1D, Pseudogene	Pseudogene	23	GC16P056643	5.53	https://www.genecards.org/cgi-bin/carddisp.pl?gene=MT1DP
SLC25A46	Solute Carrier Family 25 Member 46	Protein Coding	38	GC05P110738	5.52	https://www.genecards.org/cgi-bin/carddisp.pl?gene=SLC25A46
INTS7	Integrator Complex Subunit 7	Protein Coding	37	GC01M211940	5.52	https://www.genecards.org/cgi-bin/carddisp.pl?gene=INTS7
VTRNA2-1	Vault RNA 2-1	RNA Gene	14	GC05M136081	5.51	https://www.genecards.org/cgi-bin/carddisp.pl?gene=VTRNA2-1
MIR512-1	MicroRNA 512-1	RNA Gene	15	GC19P054033	5.51	https://www.genecards.org/cgi-bin/carddisp.pl?gene=MIR512-1
LINC00941	Long Intergenic Non-Protein Coding RNA 941	RNA Gene	14	GC12P030757	5.51	https://www.genecards.org/cgi-bin/carddisp.pl?gene=LINC00941
NOTCH3	Notch Receptor 3	Protein Coding	50	GC19M015159	5.51	https://www.genecards.org/cgi-bin/carddisp.pl?gene=NOTCH3
DMBT1	Deleted In Malignant Brain Tumors 1	Protein Coding	42	GC10P122560	5.5	https://www.genecards.org/cgi-bin/carddisp.pl?gene=DMBT1
SMIM31	Small Integral Membrane Protein 31	Protein Coding	13	GC04P164755	5.49	https://www.genecards.org/cgi-bin/carddisp.pl?gene=SMIM31
DDX3X	DEAD-Box Helicase 3 X-Linked	Protein Coding	49	GC0XP041333	5.48	https://www.genecards.org/cgi-bin/carddisp.pl?gene=DDX3X
TSNAX-DISC1	TSNAX-DISC1 Readthrough (NMD Candidate)	RNA Gene	18	GC01P231528	5.48	https://www.genecards.org/cgi-bin/carddisp.pl?gene=TSNAX-DISC1
GKN1	Gastrokine 1	Protein Coding	39	GC02P068974	5.48	https://www.genecards.org/cgi-bin/carddisp.pl?gene=GKN1
DVL1	Dishevelled Segment Polarity Protein 1	Protein Coding	48	GC01M001335	5.47	https://www.genecards.org/cgi-bin/carddisp.pl?gene=DVL1
STIM1	Stromal Interaction Molecule 1	Protein Coding	50	GC11P003855	5.47	https://www.genecards.org/cgi-bin/carddisp.pl?gene=STIM1
URGCP	Upregulator Of Cell Proliferation	Protein Coding	36	GC07M043876	5.47	https://www.genecards.org/cgi-bin/carddisp.pl?gene=URGCP
CASC15	Cancer Susceptibility 15	RNA Gene	19	GC06P021669	5.46	https://www.genecards.org/cgi-bin/carddisp.pl?gene=CASC15
PANTR1	POU3F3 Adjacent Non-Coding Transcript 1	RNA Gene	14	GC02M104656	5.46	https://www.genecards.org/cgi-bin/carddisp.pl?gene=PANTR1
SNHG14	Small Nucleolar RNA Host Gene 14	RNA Gene	14	GC15P024824	5.45	https://www.genecards.org/cgi-bin/carddisp.pl?gene=SNHG14
MKI67	Marker Of Proliferation Ki-67	Protein Coding	45	GC10M128096	5.44	https://www.genecards.org/cgi-bin/carddisp.pl?gene=MKI67
DLG4	Discs Large MAGUK Scaffold Protein 4	Protein Coding	48	GC17M007189	5.44	https://www.genecards.org/cgi-bin/carddisp.pl?gene=DLG4
ZMAT1	Zinc Finger Matrin-Type 1	Protein Coding	34	GC0XM101882	5.43	https://www.genecards.org/cgi-bin/carddisp.pl?gene=ZMAT1
RUFY3	RUN And FYVE Domain Containing 3	Protein Coding	36	GC04P070704	5.42	https://www.genecards.org/cgi-bin/carddisp.pl?gene=RUFY3
CCDC136	Coiled-Coil Domain Containing 136	Protein Coding	36	GC07P129139	5.42	https://www.genecards.org/cgi-bin/carddisp.pl?gene=CCDC136
CYP1A1	Cytochrome P450 Family 1 Subfamily A Member 1	Protein Coding	48	GC15M074719	5.41	https://www.genecards.org/cgi-bin/carddisp.pl?gene=CYP1A1
KRT18P55	Keratin 18 Pseudogene 55	Pseudogene	21	GC17M028275	5.41	https://www.genecards.org/cgi-bin/carddisp.pl?gene=KRT18P55
CCNA2	Cyclin A2	Protein Coding	46	GC04M121816	5.4	https://www.genecards.org/cgi-bin/carddisp.pl?gene=CCNA2
CYCS	Cytochrome C, Somatic	Protein Coding	50	GC07M025118	5.4	https://www.genecards.org/cgi-bin/carddisp.pl?gene=CYCS
RN7SK	RNA Component Of 7SK Nuclear Ribonucleoprotein	RNA Gene	20	GC06P052995	5.39	https://www.genecards.org/cgi-bin/carddisp.pl?gene=RN7SK
WNT10B	Wnt Family Member 10B	Protein Coding	49	GC12M048965	5.39	https://www.genecards.org/cgi-bin/carddisp.pl?gene=WNT10B
MIR4435-2HG	MIR4435-2 Host Gene	RNA Gene	15	GC02M111037	5.39	https://www.genecards.org/cgi-bin/carddisp.pl?gene=MIR4435-2HG
ZFHX4-AS1	ZFHX4 Antisense RNA 1	RNA Gene	15	GC08M076491	5.39	https://www.genecards.org/cgi-bin/carddisp.pl?gene=ZFHX4-AS1
SPINK1	Serine Peptidase Inhibitor, Kazal Type 1	Protein Coding	45	GC05M147825	5.39	https://www.genecards.org/cgi-bin/carddisp.pl?gene=SPINK1
CTBP1	C-Terminal Binding Protein 1	Protein Coding	49	GC04M001211	5.38	https://www.genecards.org/cgi-bin/carddisp.pl?gene=CTBP1
IL17A	Interleukin 17A	Protein Coding	44	GC06P052186	5.38	https://www.genecards.org/cgi-bin/carddisp.pl?gene=IL17A
KCTD6	Potassium Channel Tetramerization Domain Containing 6	Protein Coding	35	GC03P058452	5.37	https://www.genecards.org/cgi-bin/carddisp.pl?gene=KCTD6
LINC01006	Long Intergenic Non-Protein Coding RNA 1006	RNA Gene	21	GC07M156388	5.35	https://www.genecards.org/cgi-bin/carddisp.pl?gene=LINC01006
SNHG8	Small Nucleolar RNA Host Gene 8	RNA Gene	18	GC04P118278	5.35	https://www.genecards.org/cgi-bin/carddisp.pl?gene=SNHG8
RUNX1-IT1	RUNX1 Intronic Transcript 1	RNA Gene	17	GC21M035037	5.35	https://www.genecards.org/cgi-bin/carddisp.pl?gene=RUNX1-IT1
PRDM16-DT	PRDM16 Divergent Transcript	RNA Gene	17	GC01M003059	5.35	https://www.genecards.org/cgi-bin/carddisp.pl?gene=PRDM16-DT
LINC00668	Long Intergenic Non-Protein Coding RNA 668	RNA Gene	17	GC18M006922	5.35	https://www.genecards.org/cgi-bin/carddisp.pl?gene=LINC00668
AFDN-DT	AFDN Divergent Transcript	RNA Gene	16	GC06M167829	5.35	https://www.genecards.org/cgi-bin/carddisp.pl?gene=AFDN-DT
INHBA-AS1	INHBA Antisense RNA 1	RNA Gene	15	GC07P041693	5.35	https://www.genecards.org/cgi-bin/carddisp.pl?gene=INHBA-AS1
SLC7A11-AS1	SLC7A11 Antisense RNA 1	RNA Gene	14	GC04P138027	5.35	https://www.genecards.org/cgi-bin/carddisp.pl?gene=SLC7A11-AS1
MACC1-AS1	MACC1 Antisense RNA 1	RNA Gene	14	GC07P020183	5.35	https://www.genecards.org/cgi-bin/carddisp.pl?gene=MACC1-AS1
AGAP2-AS1	AGAP2 Antisense RNA 1	RNA Gene	14	GC12P057726	5.35	https://www.genecards.org/cgi-bin/carddisp.pl?gene=AGAP2-AS1
A2M-AS1	A2M Antisense RNA 1	RNA Gene	14	GC12P009065	5.35	https://www.genecards.org/cgi-bin/carddisp.pl?gene=A2M-AS1
VPS9D1-AS1	VPS9D1 Antisense RNA 1	RNA Gene	14	GC16P089711	5.35	https://www.genecards.org/cgi-bin/carddisp.pl?gene=VPS9D1-AS1
LINC00572	Long Intergenic Non-Protein Coding RNA 572	RNA Gene	14	GC13M029918	5.35	https://www.genecards.org/cgi-bin/carddisp.pl?gene=LINC00572
MAP3K20-AS1	MAP3K20 Antisense RNA 1	RNA Gene	13	GC02M173168	5.35	https://www.genecards.org/cgi-bin/carddisp.pl?gene=MAP3K20-AS1
SH3RF3-AS1	SH3RF3 Antisense RNA 1	RNA Gene	13	GC02M109127	5.35	https://www.genecards.org/cgi-bin/carddisp.pl?gene=SH3RF3-AS1
SUCLG2-AS1	SUCLG2 Antisense RNA 1 (Head To Head)	RNA Gene	13	GC03P067654	5.35	https://www.genecards.org/cgi-bin/carddisp.pl?gene=SUCLG2-AS1
FRGCA	FOXM1-Regulated, Gastric Cancer Associated	RNA Gene	13	GC21M043141	5.35	https://www.genecards.org/cgi-bin/carddisp.pl?gene=FRGCA
BNC2-AS1	BNC2 Antisense RNA 1	RNA Gene	13	GC09P016727	5.35	https://www.genecards.org/cgi-bin/carddisp.pl?gene=BNC2-AS1
LINC01097	Long Intergenic Non-Protein Coding RNA 1097	RNA Gene	13	GC04M013529	5.35	https://www.genecards.org/cgi-bin/carddisp.pl?gene=LINC01097
EGFLAM-AS1	EGFLAM Antisense RNA 1	RNA Gene	12	GC05M038426	5.35	https://www.genecards.org/cgi-bin/carddisp.pl?gene=EGFLAM-AS1
LINC01612	Long Intergenic Non-Protein Coding RNA 1612	RNA Gene	12	GC04P170226	5.35	https://www.genecards.org/cgi-bin/carddisp.pl?gene=LINC01612
SLC5A4-AS1	SLC5A4 Antisense RNA 1	RNA Gene	11	GC22P032206	5.35	https://www.genecards.org/cgi-bin/carddisp.pl?gene=SLC5A4-AS1
KRT7-AS	KRT7 Antisense RNA 1	RNA Gene	11	GC12M052246	5.35	https://www.genecards.org/cgi-bin/carddisp.pl?gene=KRT7-AS
LOC101929759	Uncharacterized LOC101929759	RNA Gene	10	GC08P069834	5.35	https://www.genecards.org/cgi-bin/carddisp.pl?gene=LOC101929759
PCNA-AS1	PCNA Antisense RNA 1	RNA Gene	10	GC20P005119	5.35	https://www.genecards.org/cgi-bin/carddisp.pl?gene=PCNA-AS1
TNFRSF10A-AS1	TNFRSF10A Antisense RNA 1	RNA Gene	10	GC08P023190	5.35	https://www.genecards.org/cgi-bin/carddisp.pl?gene=TNFRSF10A-AS1
LINC01856	Long Intergenic Non-Protein Coding RNA 1856	RNA Gene	9	GC02P129924	5.35	https://www.genecards.org/cgi-bin/carddisp.pl?gene=LINC01856
LINC02461	Long Intergenic Non-Protein Coding RNA 2461	RNA Gene	9	GC12P043156	5.35	https://www.genecards.org/cgi-bin/carddisp.pl?gene=LINC02461
ENSG00000229717		RNA Gene	8	GC04P075830	5.35	https://www.genecards.org/cgi-bin/carddisp.pl?gene=ENSG00000229717
ENSG00000232406		Uncategorized	8	GC20M036149	5.35	https://www.genecards.org/cgi-bin/carddisp.pl?gene=ENSG00000232406
ENSG00000225032		Uncategorized	8	GC09P127817	5.35	https://www.genecards.org/cgi-bin/carddisp.pl?gene=ENSG00000225032
ENSG00000253389		RNA Gene	7	GC08P041682	5.35	https://www.genecards.org/cgi-bin/carddisp.pl?gene=ENSG00000253389
ENSG00000224220		RNA Gene	7	GC02P025421	5.35	https://www.genecards.org/cgi-bin/carddisp.pl?gene=ENSG00000224220
ENSG00000249201		Uncategorized	6	GC05M001173	5.35	https://www.genecards.org/cgi-bin/carddisp.pl?gene=ENSG00000249201
ENSG00000266990		RNA Gene	6	GC19M000999	5.35	https://www.genecards.org/cgi-bin/carddisp.pl?gene=ENSG00000266990
ENSG00000250406		RNA Gene	5	GC04P144851	5.35	https://www.genecards.org/cgi-bin/carddisp.pl?gene=ENSG00000250406
TCONS_00068220	Uncharacterized TCONS_00068220	RNA Gene	5	GC08M047990	5.35	https://www.genecards.org/cgi-bin/carddisp.pl?gene=TCONS_00068220
ENSG00000285159		RNA Gene	5	GC06P159018	5.35	https://www.genecards.org/cgi-bin/carddisp.pl?gene=ENSG00000285159
ENSG00000277200		RNA Gene	5	GC17M002720	5.35	https://www.genecards.org/cgi-bin/carddisp.pl?gene=ENSG00000277200
NR1H2	Nuclear Receptor Subfamily 1 Group H Member 2	Protein Coding	49	GC19P050329	5.35	https://www.genecards.org/cgi-bin/carddisp.pl?gene=NR1H2
BARHL1	BarH Like Homeobox 1	Protein Coding	35	GC09P132582	5.35	https://www.genecards.org/cgi-bin/carddisp.pl?gene=BARHL1
DCC	DCC Netrin 1 Receptor	Protein Coding	47	GC18P052340	5.31	https://www.genecards.org/cgi-bin/carddisp.pl?gene=DCC
PAX8	Paired Box 8	Protein Coding	48	GC02M113215	5.31	https://www.genecards.org/cgi-bin/carddisp.pl?gene=PAX8
WNT5A	Wnt Family Member 5A	Protein Coding	50	GC03M055465	5.31	https://www.genecards.org/cgi-bin/carddisp.pl?gene=WNT5A
CDCA7L	Cell Division Cycle Associated 7 Like	Protein Coding	40	GC07M021900	5.31	https://www.genecards.org/cgi-bin/carddisp.pl?gene=CDCA7L
IKBKB	Inhibitor Of Nuclear Factor Kappa B Kinase Subunit Beta	Protein Coding	54	GC08P042271	5.29	https://www.genecards.org/cgi-bin/carddisp.pl?gene=IKBKB
IHH	Indian Hedgehog Signaling Molecule	Protein Coding	48	GC02M219054	5.26	https://www.genecards.org/cgi-bin/carddisp.pl?gene=IHH
SYNM	Synemin	Protein Coding	38	GC15P099098	5.24	https://www.genecards.org/cgi-bin/carddisp.pl?gene=SYNM
KCTD21	Potassium Channel Tetramerization Domain Containing 21	Protein Coding	33	GC11M078171	5.22	https://www.genecards.org/cgi-bin/carddisp.pl?gene=KCTD21
IL13RA2	Interleukin 13 Receptor Subunit Alpha 2	Protein Coding	41	GC0XM115003	5.2	https://www.genecards.org/cgi-bin/carddisp.pl?gene=IL13RA2
KEAP1	Kelch Like ECH Associated Protein 1	Protein Coding	48	GC19M010486	5.2	https://www.genecards.org/cgi-bin/carddisp.pl?gene=KEAP1
HSPA8	Heat Shock Protein Family A (Hsp70) Member 8	Protein Coding	48	GC11M123057	5.19	https://www.genecards.org/cgi-bin/carddisp.pl?gene=HSPA8
ARHGEF4	Rho Guanine Nucleotide Exchange Factor 4	Protein Coding	41	GC02P130836	5.18	https://www.genecards.org/cgi-bin/carddisp.pl?gene=ARHGEF4
KLC1	Kinesin Light Chain 1	Protein Coding	41	GC14P103955	5.18	https://www.genecards.org/cgi-bin/carddisp.pl?gene=KLC1
ABR	ABR Activator Of RhoGEF And GTPase	Protein Coding	42	GC17M001003	5.15	https://www.genecards.org/cgi-bin/carddisp.pl?gene=ABR
INHA	Inhibin Subunit Alpha	Protein Coding	45	GC02P219569	5.12	https://www.genecards.org/cgi-bin/carddisp.pl?gene=INHA
ELN	Elastin	Protein Coding	45	GC07P074027	5.11	https://www.genecards.org/cgi-bin/carddisp.pl?gene=ELN
TWIST1	Twist Family BHLH Transcription Factor 1	Protein Coding	46	GC07M019020	5.09	https://www.genecards.org/cgi-bin/carddisp.pl?gene=TWIST1
NFKBIA	NFKB Inhibitor Alpha	Protein Coding	51	GC14M035401	5.08	https://www.genecards.org/cgi-bin/carddisp.pl?gene=NFKBIA
BMP4	Bone Morphogenetic Protein 4	Protein Coding	50	GC14M053949	5.07	https://www.genecards.org/cgi-bin/carddisp.pl?gene=BMP4
MUC4	Mucin 4, Cell Surface Associated	Protein Coding	40	GC03M195746	5.04	https://www.genecards.org/cgi-bin/carddisp.pl?gene=MUC4
KCTD11	Potassium Channel Tetramerization Domain Containing 11	Protein Coding	34	GC17P007351	5	https://www.genecards.org/cgi-bin/carddisp.pl?gene=KCTD11
VCAM1	Vascular Cell Adhesion Molecule 1	Protein Coding	47	GC01P100719	5	https://www.genecards.org/cgi-bin/carddisp.pl?gene=VCAM1
HSP90AA1	Heat Shock Protein 90 Alpha Family Class A Member 1	Protein Coding	49	GC14M102080	4.99	https://www.genecards.org/cgi-bin/carddisp.pl?gene=HSP90AA1
SRRM4	Serine/Arginine Repetitive Matrix 4	Protein Coding	36	GC12P118981	4.99	https://www.genecards.org/cgi-bin/carddisp.pl?gene=SRRM4
MYOD1	Myogenic Differentiation 1	Protein Coding	46	GC11P017741	4.95	https://www.genecards.org/cgi-bin/carddisp.pl?gene=MYOD1
FHL2	Four And A Half LIM Domains 2	Protein Coding	46	GC02M105343	4.93	https://www.genecards.org/cgi-bin/carddisp.pl?gene=FHL2
RPH3AL	Rabphilin 3A Like (Without C2 Domains)	Protein Coding	39	GC17M000212	4.91	https://www.genecards.org/cgi-bin/carddisp.pl?gene=RPH3AL
NRP1	Neuropilin 1	Protein Coding	48	GC10M033177	4.9	https://www.genecards.org/cgi-bin/carddisp.pl?gene=NRP1
CSNK1E	Casein Kinase 1 Epsilon	Protein Coding	49	GC22M042993	4.9	https://www.genecards.org/cgi-bin/carddisp.pl?gene=CSNK1E
NEURL1	Neuralized E3 Ubiquitin Protein Ligase 1	Protein Coding	37	GC10P103493	4.88	https://www.genecards.org/cgi-bin/carddisp.pl?gene=NEURL1
MYCNOS	MYCN Opposite Strand	RNA Gene	24	GC02M015918	4.88	https://www.genecards.org/cgi-bin/carddisp.pl?gene=MYCNOS
ABCA4	ATP Binding Cassette Subfamily A Member 4	Protein Coding	46	GC01M093992	4.87	https://www.genecards.org/cgi-bin/carddisp.pl?gene=ABCA4
JKAMP	JNK1/MAPK8 Associated Membrane Protein	Protein Coding	36	GC14P059484	4.86	https://www.genecards.org/cgi-bin/carddisp.pl?gene=JKAMP
NPY	Neuropeptide Y	Protein Coding	46	GC07P024290	4.85	https://www.genecards.org/cgi-bin/carddisp.pl?gene=NPY
S100A1	S100 Calcium Binding Protein A1	Protein Coding	43	GC01P153627	4.85	https://www.genecards.org/cgi-bin/carddisp.pl?gene=S100A1
EPHX1	Epoxide Hydrolase 1	Protein Coding	48	GC01P225810	4.84	https://www.genecards.org/cgi-bin/carddisp.pl?gene=EPHX1
PPARA	Peroxisome Proliferator Activated Receptor Alpha	Protein Coding	47	GC22P046150	4.84	https://www.genecards.org/cgi-bin/carddisp.pl?gene=PPARA
PRKCB	Protein Kinase C Beta	Protein Coding	49	GC16P023854	4.83	https://www.genecards.org/cgi-bin/carddisp.pl?gene=PRKCB
ALOX12	Arachidonate 12-Lipoxygenase, 12S Type	Protein Coding	45	GC17P006995	4.83	https://www.genecards.org/cgi-bin/carddisp.pl?gene=ALOX12
FOSL1	FOS Like 1, AP-1 Transcription Factor Subunit	Protein Coding	45	GC11M065909	4.82	https://www.genecards.org/cgi-bin/carddisp.pl?gene=FOSL1
CCNB1	Cyclin B1	Protein Coding	49	GC05P069167	4.81	https://www.genecards.org/cgi-bin/carddisp.pl?gene=CCNB1
PLAG1	PLAG1 Zinc Finger	Protein Coding	42	GC08M056161	4.8	https://www.genecards.org/cgi-bin/carddisp.pl?gene=PLAG1
MIR182	MicroRNA 182	RNA Gene	18	GC07M129770	4.8	https://www.genecards.org/cgi-bin/carddisp.pl?gene=MIR182
CXCL12	C-X-C Motif Chemokine Ligand 12	Protein Coding	46	GC10M044370	4.8	https://www.genecards.org/cgi-bin/carddisp.pl?gene=CXCL12
HLA-A	Major Histocompatibility Complex, Class I, A	Protein Coding	48	GC06P032562	4.79	https://www.genecards.org/cgi-bin/carddisp.pl?gene=HLA-A
EPHA2	EPH Receptor A2	Protein Coding	53	GC01M016124	4.79	https://www.genecards.org/cgi-bin/carddisp.pl?gene=EPHA2
HSPA4	Heat Shock Protein Family A (Hsp70) Member 4	Protein Coding	44	GC05P133051	4.78	https://www.genecards.org/cgi-bin/carddisp.pl?gene=HSPA4
HMGA2	High Mobility Group AT-Hook 2	Protein Coding	46	GC12P065824	4.75	https://www.genecards.org/cgi-bin/carddisp.pl?gene=HMGA2
GRIN2A	Glutamate Ionotropic Receptor NMDA Type Subunit 2A	Protein Coding	52	GC16M009753	4.73	https://www.genecards.org/cgi-bin/carddisp.pl?gene=GRIN2A
CEACAM3	CEA Cell Adhesion Molecule 3	Protein Coding	41	GC19P041796	4.72	https://www.genecards.org/cgi-bin/carddisp.pl?gene=CEACAM3
DNMT3B	DNA Methyltransferase 3 Beta	Protein Coding	50	GC20P032762	4.7	https://www.genecards.org/cgi-bin/carddisp.pl?gene=DNMT3B
BCAR1	BCAR1 Scaffold Protein, Cas Family Member	Protein Coding	45	GC16M075228	4.66	https://www.genecards.org/cgi-bin/carddisp.pl?gene=BCAR1
GGT1	Gamma-Glutamyltransferase 1	Protein Coding	47	GC22P024583	4.66	https://www.genecards.org/cgi-bin/carddisp.pl?gene=GGT1
NR4A2	Nuclear Receptor Subfamily 4 Group A Member 2	Protein Coding	46	GC02M156324	4.66	https://www.genecards.org/cgi-bin/carddisp.pl?gene=NR4A2
NFATC1	Nuclear Factor Of Activated T Cells 1	Protein Coding	49	GC18P079395	4.65	https://www.genecards.org/cgi-bin/carddisp.pl?gene=NFATC1
CYP27A1	Cytochrome P450 Family 27 Subfamily A Member 1	Protein Coding	48	GC02P218781	4.61	https://www.genecards.org/cgi-bin/carddisp.pl?gene=CYP27A1
TIMP2	TIMP Metallopeptidase Inhibitor 2	Protein Coding	45	GC17M078852	4.61	https://www.genecards.org/cgi-bin/carddisp.pl?gene=TIMP2
ELAVL1	ELAV Like RNA Binding Protein 1	Protein Coding	43	GC19M007958	4.61	https://www.genecards.org/cgi-bin/carddisp.pl?gene=ELAVL1
PECAM1	Platelet And Endothelial Cell Adhesion Molecule 1	Protein Coding	42	GC17M064319	4.59	https://www.genecards.org/cgi-bin/carddisp.pl?gene=PECAM1
XPO1	Exportin 1	Protein Coding	46	GC02M061445	4.59	https://www.genecards.org/cgi-bin/carddisp.pl?gene=XPO1
DAPK1	Death Associated Protein Kinase 1	Protein Coding	49	GC09P087497	4.59	https://www.genecards.org/cgi-bin/carddisp.pl?gene=DAPK1
LINC00271	Long Intergenic Non-Protein Coding RNA 271	RNA Gene	19	GC06P135497	4.59	https://www.genecards.org/cgi-bin/carddisp.pl?gene=LINC00271
GADD45A	Growth Arrest And DNA Damage Inducible Alpha	Protein Coding	46	GC01P067685	4.59	https://www.genecards.org/cgi-bin/carddisp.pl?gene=GADD45A
SELE	Selectin E	Protein Coding	45	GC01M169722	4.58	https://www.genecards.org/cgi-bin/carddisp.pl?gene=SELE
DCTN1	Dynactin Subunit 1	Protein Coding	47	GC02M074361	4.57	https://www.genecards.org/cgi-bin/carddisp.pl?gene=DCTN1
PRSS1	Serine Protease 1	Protein Coding	46	GC07P144468	4.56	https://www.genecards.org/cgi-bin/carddisp.pl?gene=PRSS1
MYB	MYB Proto-Oncogene, Transcription Factor	Protein Coding	51	GC06P135180	4.56	https://www.genecards.org/cgi-bin/carddisp.pl?gene=MYB
TFDP1	Transcription Factor Dp-1	Protein Coding	46	GC13P113584	4.52	https://www.genecards.org/cgi-bin/carddisp.pl?gene=TFDP1
RAN	RAN, Member RAS Oncogene Family	Protein Coding	46	GC12P130871	4.52	https://www.genecards.org/cgi-bin/carddisp.pl?gene=RAN
CDH13	Cadherin 13	Protein Coding	43	GC16P082626	4.52	https://www.genecards.org/cgi-bin/carddisp.pl?gene=CDH13
LTA	Lymphotoxin Alpha	Protein Coding	44	GC06P032602	4.5	https://www.genecards.org/cgi-bin/carddisp.pl?gene=LTA
RHO	Rhodopsin	Protein Coding	49	GC03P130153	4.5	https://www.genecards.org/cgi-bin/carddisp.pl?gene=RHO
PRKCA	Protein Kinase C Alpha	Protein Coding	52	GC17P066302	4.49	https://www.genecards.org/cgi-bin/carddisp.pl?gene=PRKCA
PTPN13	Protein Tyrosine Phosphatase Non-Receptor Type 13	Protein Coding	45	GC04P086594	4.49	https://www.genecards.org/cgi-bin/carddisp.pl?gene=PTPN13
HDAC2	Histone Deacetylase 2	Protein Coding	53	GC06M113933	4.49	https://www.genecards.org/cgi-bin/carddisp.pl?gene=HDAC2
RNASEL	Ribonuclease L	Protein Coding	45	GC01M182542	4.46	https://www.genecards.org/cgi-bin/carddisp.pl?gene=RNASEL
JAK1	Janus Kinase 1	Protein Coding	51	GC01M064833	4.45	https://www.genecards.org/cgi-bin/carddisp.pl?gene=JAK1
FBN2	Fibrillin 2	Protein Coding	43	GC05M128257	4.45	https://www.genecards.org/cgi-bin/carddisp.pl?gene=FBN2
UCHL1	Ubiquitin C-Terminal Hydrolase L1	Protein Coding	53	GC04P041256	4.38	https://www.genecards.org/cgi-bin/carddisp.pl?gene=UCHL1
CBL	Cbl Proto-Oncogene	Protein Coding	52	GC11P119206	4.37	https://www.genecards.org/cgi-bin/carddisp.pl?gene=CBL
PLA2G4A	Phospholipase A2 Group IVA	Protein Coding	49	GC01P186798	4.37	https://www.genecards.org/cgi-bin/carddisp.pl?gene=PLA2G4A
PRKCD	Protein Kinase C Delta	Protein Coding	54	GC03P053156	4.37	https://www.genecards.org/cgi-bin/carddisp.pl?gene=PRKCD
CTSB	Cathepsin B	Protein Coding	52	GC08M011842	4.36	https://www.genecards.org/cgi-bin/carddisp.pl?gene=CTSB
CXCR4	C-X-C Motif Chemokine Receptor 4	Protein Coding	53	GC02M136114	4.35	https://www.genecards.org/cgi-bin/carddisp.pl?gene=CXCR4
TKT	Transketolase	Protein Coding	49	GC03M053224	4.35	https://www.genecards.org/cgi-bin/carddisp.pl?gene=TKT
TNFRSF10A	TNF Receptor Superfamily Member 10a	Protein Coding	46	GC08M023190	4.35	https://www.genecards.org/cgi-bin/carddisp.pl?gene=TNFRSF10A
WNT10A	Wnt Family Member 10A	Protein Coding	47	GC02P218880	4.34	https://www.genecards.org/cgi-bin/carddisp.pl?gene=WNT10A
XDH	Xanthine Dehydrogenase	Protein Coding	48	GC02M031294	4.33	https://www.genecards.org/cgi-bin/carddisp.pl?gene=XDH
UNC5C	Unc-5 Netrin Receptor C	Protein Coding	42	GC04M095162	4.33	https://www.genecards.org/cgi-bin/carddisp.pl?gene=UNC5C
CPOX	Coproporphyrinogen Oxidase	Protein Coding	44	GC03M098576	4.32	https://www.genecards.org/cgi-bin/carddisp.pl?gene=CPOX
UGT1A6	UDP Glucuronosyltransferase Family 1 Member A6	Protein Coding	42	GC02P233691	4.31	https://www.genecards.org/cgi-bin/carddisp.pl?gene=UGT1A6
FGF3	Fibroblast Growth Factor 3	Protein Coding	46	GC11M069811	4.31	https://www.genecards.org/cgi-bin/carddisp.pl?gene=FGF3
KIFAP3	Kinesin Associated Protein 3	Protein Coding	42	GC01M169890	4.3	https://www.genecards.org/cgi-bin/carddisp.pl?gene=KIFAP3
IFI27	Interferon Alpha Inducible Protein 27	Protein Coding	39	GC14P094104	4.3	https://www.genecards.org/cgi-bin/carddisp.pl?gene=IFI27
CLU	Clusterin	Protein Coding	48	GC08M027596	4.28	https://www.genecards.org/cgi-bin/carddisp.pl?gene=CLU
WNT3A	Wnt Family Member 3A	Protein Coding	49	GC01P228017	4.28	https://www.genecards.org/cgi-bin/carddisp.pl?gene=WNT3A
PPP2R5A	Protein Phosphatase 2 Regulatory Subunit B'Alpha	Protein Coding	41	GC01P212285	4.27	https://www.genecards.org/cgi-bin/carddisp.pl?gene=PPP2R5A
CD28	CD28 Molecule	Protein Coding	48	GC02P203706	4.27	https://www.genecards.org/cgi-bin/carddisp.pl?gene=CD28
PPP2CA	Protein Phosphatase 2 Catalytic Subunit Alpha	Protein Coding	49	GC05M134194	4.27	https://www.genecards.org/cgi-bin/carddisp.pl?gene=PPP2CA
MYOC	Myocilin	Protein Coding	43	GC01M171604	4.26	https://www.genecards.org/cgi-bin/carddisp.pl?gene=MYOC
BCL2L11	BCL2 Like 11	Protein Coding	46	GC02P111119	4.25	https://www.genecards.org/cgi-bin/carddisp.pl?gene=BCL2L11
CCN1	Cellular Communication Network Factor 1	Protein Coding	33	GC01P085581	4.25	https://www.genecards.org/cgi-bin/carddisp.pl?gene=CCN1
CCND2-AS1	CCND2 Antisense RNA 1	RNA Gene	14	GC12M004248	4.25	https://www.genecards.org/cgi-bin/carddisp.pl?gene=CCND2-AS1
APAF1	Apoptotic Peptidase Activating Factor 1	Protein Coding	48	GC12P098645	4.24	https://www.genecards.org/cgi-bin/carddisp.pl?gene=APAF1
AXL	AXL Receptor Tyrosine Kinase	Protein Coding	52	GC19P041219	4.24	https://www.genecards.org/cgi-bin/carddisp.pl?gene=AXL
COX5A	Cytochrome C Oxidase Subunit 5A	Protein Coding	44	GC15M074919	4.22	https://www.genecards.org/cgi-bin/carddisp.pl?gene=COX5A
FZD5	Frizzled Class Receptor 5	Protein Coding	48	GC02M207762	4.2	https://www.genecards.org/cgi-bin/carddisp.pl?gene=FZD5
FMO3	Flavin Containing Dimethylaniline Monoxygenase 3	Protein Coding	48	GC01P171090	4.2	https://www.genecards.org/cgi-bin/carddisp.pl?gene=FMO3
TLR9	Toll Like Receptor 9	Protein Coding	47	GC03M052222	4.2	https://www.genecards.org/cgi-bin/carddisp.pl?gene=TLR9
KHDRBS1	KH RNA Binding Domain Containing, Signal Transduction Associated 1	Protein Coding	41	GC01P031981	4.19	https://www.genecards.org/cgi-bin/carddisp.pl?gene=KHDRBS1
UGT2B15	UDP Glucuronosyltransferase Family 2 Member B15	Protein Coding	43	GC04M068646	4.19	https://www.genecards.org/cgi-bin/carddisp.pl?gene=UGT2B15
PLEK	Pleckstrin	Protein Coding	41	GC02P068365	4.19	https://www.genecards.org/cgi-bin/carddisp.pl?gene=PLEK
IL33	Interleukin 33	Protein Coding	41	GC09P006206	4.19	https://www.genecards.org/cgi-bin/carddisp.pl?gene=IL33
APELA	Apelin Receptor Early Endogenous Ligand	Protein Coding	20	GC04P164877	4.18	https://www.genecards.org/cgi-bin/carddisp.pl?gene=APELA
FADD	Fas Associated Via Death Domain	Protein Coding	49	GC11P070203	4.18	https://www.genecards.org/cgi-bin/carddisp.pl?gene=FADD
CHRNA3	Cholinergic Receptor Nicotinic Alpha 3 Subunit	Protein Coding	45	GC15M078594	4.18	https://www.genecards.org/cgi-bin/carddisp.pl?gene=CHRNA3
ALOX15	Arachidonate 15-Lipoxygenase	Protein Coding	46	GC17M004630	4.18	https://www.genecards.org/cgi-bin/carddisp.pl?gene=ALOX15
SP3	Sp3 Transcription Factor	Protein Coding	42	GC02M173882	4.16	https://www.genecards.org/cgi-bin/carddisp.pl?gene=SP3
DDIT3	DNA Damage Inducible Transcript 3	Protein Coding	46	GC12M057516	4.16	https://www.genecards.org/cgi-bin/carddisp.pl?gene=DDIT3
PLA2G7	Phospholipase A2 Group VII	Protein Coding	51	GC06M046704	4.15	https://www.genecards.org/cgi-bin/carddisp.pl?gene=PLA2G7
CTSD	Cathepsin D	Protein Coding	53	GC11M001752	4.15	https://www.genecards.org/cgi-bin/carddisp.pl?gene=CTSD
ELF3-AS1	ELF3 Antisense RNA 1	RNA Gene	11	GC01M202001	4.14	https://www.genecards.org/cgi-bin/carddisp.pl?gene=ELF3-AS1
CLDN7	Claudin 7	Protein Coding	42	GC17M007259	4.14	https://www.genecards.org/cgi-bin/carddisp.pl?gene=CLDN7
DNMT3A	DNA Methyltransferase 3 Alpha	Protein Coding	52	GC02M025228	4.13	https://www.genecards.org/cgi-bin/carddisp.pl?gene=DNMT3A
FEN1	Flap Structure-Specific Endonuclease 1	Protein Coding	48	GC11P061811	4.13	https://www.genecards.org/cgi-bin/carddisp.pl?gene=FEN1
GAS8-AS1	GAS8 Antisense RNA 1	RNA Gene	24	GC16M090028	4.12	https://www.genecards.org/cgi-bin/carddisp.pl?gene=GAS8-AS1
MCF2	MCF.2 Cell Line Derived Transforming Sequence	Protein Coding	40	GC0XM139581	4.11	https://www.genecards.org/cgi-bin/carddisp.pl?gene=MCF2
PPARD	Peroxisome Proliferator Activated Receptor Delta	Protein Coding	48	GC06P043340	4.11	https://www.genecards.org/cgi-bin/carddisp.pl?gene=PPARD
DCTN1-AS1	DCTN1 Antisense RNA 1	RNA Gene	14	GC02P074386	4.11	https://www.genecards.org/cgi-bin/carddisp.pl?gene=DCTN1-AS1
LNCNEF	LncRNA Neighboring Enhancer Of FOXA2	RNA Gene	12	GC20M022588	4.11	https://www.genecards.org/cgi-bin/carddisp.pl?gene=LNCNEF
LINC01929	Long Intergenic Non-Protein Coding RNA 1929	RNA Gene	10	GC18M055106	4.11	https://www.genecards.org/cgi-bin/carddisp.pl?gene=LINC01929
ENSG00000228079		RNA Gene	7	GC02M064086	4.11	https://www.genecards.org/cgi-bin/carddisp.pl?gene=ENSG00000228079
ENSG00000229913		RNA Gene	6	GC01M056824	4.11	https://www.genecards.org/cgi-bin/carddisp.pl?gene=ENSG00000229913
ENSG00000260412		RNA Gene	6	GC09M027937	4.11	https://www.genecards.org/cgi-bin/carddisp.pl?gene=ENSG00000260412
ENSG00000261399		RNA Gene	5	GC16M001714	4.11	https://www.genecards.org/cgi-bin/carddisp.pl?gene=ENSG00000261399
ENSG00000255109		RNA Gene	4	GC11M042183	4.11	https://www.genecards.org/cgi-bin/carddisp.pl?gene=ENSG00000255109
SPATA13	Spermatogenesis Associated 13	Protein Coding	37	GC13P024008	4.1	https://www.genecards.org/cgi-bin/carddisp.pl?gene=SPATA13
CSNK1A1	Casein Kinase 1 Alpha 1	Protein Coding	49	GC05M149492	4.1	https://www.genecards.org/cgi-bin/carddisp.pl?gene=CSNK1A1
HDAC1	Histone Deacetylase 1	Protein Coding	50	GC01P032292	4.09	https://www.genecards.org/cgi-bin/carddisp.pl?gene=HDAC1
CDK5	Cyclin Dependent Kinase 5	Protein Coding	53	GC07M151053	4.09	https://www.genecards.org/cgi-bin/carddisp.pl?gene=CDK5
SLC10A2	Solute Carrier Family 10 Member 2	Protein Coding	41	GC13M103043	4.08	https://www.genecards.org/cgi-bin/carddisp.pl?gene=SLC10A2
MT-CO3	Mitochondrially Encoded Cytochrome C Oxidase III	Protein Coding	31	GCMTP009209	4.07	https://www.genecards.org/cgi-bin/carddisp.pl?gene=MT-CO3
ADCY10	Adenylate Cyclase 10	Protein Coding	45	GC01M167809	4.07	https://www.genecards.org/cgi-bin/carddisp.pl?gene=ADCY10
IL6ST	Interleukin 6 Signal Transducer	Protein Coding	47	GC05M055935	4.06	https://www.genecards.org/cgi-bin/carddisp.pl?gene=IL6ST
SOD2	Superoxide Dismutase 2	Protein Coding	52	GC06M159669	4.06	https://www.genecards.org/cgi-bin/carddisp.pl?gene=SOD2
POLB	DNA Polymerase Beta	Protein Coding	48	GC08P042338	4.06	https://www.genecards.org/cgi-bin/carddisp.pl?gene=POLB
MMP14	Matrix Metallopeptidase 14	Protein Coding	52	GC14P024724	4.06	https://www.genecards.org/cgi-bin/carddisp.pl?gene=MMP14
MRE11	MRE11 Homolog, Double Strand Break Repair Nuclease	Protein Coding	43	GC11M094416	4.04	https://www.genecards.org/cgi-bin/carddisp.pl?gene=MRE11
CSNK2A1	Casein Kinase 2 Alpha 1	Protein Coding	52	GC20M000472	4.04	https://www.genecards.org/cgi-bin/carddisp.pl?gene=CSNK2A1
UGT2B7	UDP Glucuronosyltransferase Family 2 Member B7	Protein Coding	45	GC04P069051	4.04	https://www.genecards.org/cgi-bin/carddisp.pl?gene=UGT2B7
PPOX	Protoporphyrinogen Oxidase	Protein Coding	44	GC01P161167	4.02	https://www.genecards.org/cgi-bin/carddisp.pl?gene=PPOX
SMAD1	SMAD Family Member 1	Protein Coding	45	GC04P145481	4.01	https://www.genecards.org/cgi-bin/carddisp.pl?gene=SMAD1
TCHH	Trichohyalin	Protein Coding	36	GC01M152106	4.01	https://www.genecards.org/cgi-bin/carddisp.pl?gene=TCHH
ACTB	Actin Beta	Protein Coding	50	GC07M005527	3.99	https://www.genecards.org/cgi-bin/carddisp.pl?gene=ACTB
PLK1	Polo Like Kinase 1	Protein Coding	50	GC16P023850	3.98	https://www.genecards.org/cgi-bin/carddisp.pl?gene=PLK1
HDAC9	Histone Deacetylase 9	Protein Coding	48	GC07P018086	3.98	https://www.genecards.org/cgi-bin/carddisp.pl?gene=HDAC9
SFRP1	Secreted Frizzled Related Protein 1	Protein Coding	45	GC08M041238	3.96	https://www.genecards.org/cgi-bin/carddisp.pl?gene=SFRP1
KRT5	Keratin 5	Protein Coding	48	GC12M052514	3.95	https://www.genecards.org/cgi-bin/carddisp.pl?gene=KRT5
KIF3A	Kinesin Family Member 3A	Protein Coding	42	GC05M132689	3.94	https://www.genecards.org/cgi-bin/carddisp.pl?gene=KIF3A
HCP5	HLA Complex P5	RNA Gene	29	GC06P031400	3.94	https://www.genecards.org/cgi-bin/carddisp.pl?gene=HCP5
NR3C1	Nuclear Receptor Subfamily 3 Group C Member 1	Protein Coding	51	GC05M143277	3.93	https://www.genecards.org/cgi-bin/carddisp.pl?gene=NR3C1
LGR6	Leucine Rich Repeat Containing G Protein-Coupled Receptor 6	Protein Coding	43	GC01P202193	3.93	https://www.genecards.org/cgi-bin/carddisp.pl?gene=LGR6
UGT1A10	UDP Glucuronosyltransferase Family 1 Member A10	Protein Coding	41	GC02P233636	3.93	https://www.genecards.org/cgi-bin/carddisp.pl?gene=UGT1A10
SOCS1	Suppressor Of Cytokine Signaling 1	Protein Coding	45	GC16M011255	3.92	https://www.genecards.org/cgi-bin/carddisp.pl?gene=SOCS1
KMT2A	Lysine Methyltransferase 2A	Protein Coding	46	GC11P118436	3.91	https://www.genecards.org/cgi-bin/carddisp.pl?gene=KMT2A
WNT3	Wnt Family Member 3	Protein Coding	48	GC17M046762	3.91	https://www.genecards.org/cgi-bin/carddisp.pl?gene=WNT3
S100A4	S100 Calcium Binding Protein A4	Protein Coding	45	GC01M153543	3.9	https://www.genecards.org/cgi-bin/carddisp.pl?gene=S100A4
GRIN2B	Glutamate Ionotropic Receptor NMDA Type Subunit 2B	Protein Coding	51	GC12M013437	3.89	https://www.genecards.org/cgi-bin/carddisp.pl?gene=GRIN2B
AHR	Aryl Hydrocarbon Receptor	Protein Coding	50	GC07P016916	3.88	https://www.genecards.org/cgi-bin/carddisp.pl?gene=AHR
UBC	Ubiquitin C	Protein Coding	44	GC12M124911	3.87	https://www.genecards.org/cgi-bin/carddisp.pl?gene=UBC
IL10RB	Interleukin 10 Receptor Subunit Beta	Protein Coding	46	GC21P033266	3.87	https://www.genecards.org/cgi-bin/carddisp.pl?gene=IL10RB
SPARC	Secreted Protein Acidic And Cysteine Rich	Protein Coding	52	GC05M151639	3.86	https://www.genecards.org/cgi-bin/carddisp.pl?gene=SPARC
MMP13	Matrix Metallopeptidase 13	Protein Coding	51	GC11M102942	3.86	https://www.genecards.org/cgi-bin/carddisp.pl?gene=MMP13
CHUK	Component Of Inhibitor Of Nuclear Factor Kappa B Kinase Complex	Protein Coding	53	GC10M100188	3.85	https://www.genecards.org/cgi-bin/carddisp.pl?gene=CHUK
USF2	Upstream Transcription Factor 2, C-Fos Interacting	Protein Coding	41	GC19P035268	3.83	https://www.genecards.org/cgi-bin/carddisp.pl?gene=USF2
WNT2	Wnt Family Member 2	Protein Coding	45	GC07M117276	3.83	https://www.genecards.org/cgi-bin/carddisp.pl?gene=WNT2
HSF1	Heat Shock Transcription Factor 1	Protein Coding	46	GC08P144291	3.83	https://www.genecards.org/cgi-bin/carddisp.pl?gene=HSF1
CSF1	Colony Stimulating Factor 1	Protein Coding	45	GC01P109911	3.82	https://www.genecards.org/cgi-bin/carddisp.pl?gene=CSF1
COL11A1	Collagen Type XI Alpha 1 Chain	Protein Coding	44	GC01M102876	3.81	https://www.genecards.org/cgi-bin/carddisp.pl?gene=COL11A1
PER2	Period Circadian Regulator 2	Protein Coding	45	GC02M238244	3.79	https://www.genecards.org/cgi-bin/carddisp.pl?gene=PER2
GGT3P	Gamma-Glutamyltransferase 3 Pseudogene	Pseudogene	21	GC22M018773	3.76	https://www.genecards.org/cgi-bin/carddisp.pl?gene=GGT3P
TUBA4A	Tubulin Alpha 4a	Protein Coding	46	GC02M219249	3.76	https://www.genecards.org/cgi-bin/carddisp.pl?gene=TUBA4A
UGT1A4	UDP Glucuronosyltransferase Family 1 Member A4	Protein Coding	42	GC02P233718	3.76	https://www.genecards.org/cgi-bin/carddisp.pl?gene=UGT1A4
PIK3CB	Phosphatidylinositol-4,5-Bisphosphate 3-Kinase Catalytic Subunit Beta	Protein Coding	48	GC03M138652	3.76	https://www.genecards.org/cgi-bin/carddisp.pl?gene=PIK3CB
SKP1	S-Phase Kinase Associated Protein 1	Protein Coding	44	GC05M134148	3.75	https://www.genecards.org/cgi-bin/carddisp.pl?gene=SKP1
ALOX5	Arachidonate 5-Lipoxygenase	Protein Coding	49	GC10P045374	3.74	https://www.genecards.org/cgi-bin/carddisp.pl?gene=ALOX5
DLG3	Discs Large MAGUK Scaffold Protein 3	Protein Coding	44	GC0XP070444	3.74	https://www.genecards.org/cgi-bin/carddisp.pl?gene=DLG3
DHRS9	Dehydrogenase/Reductase 9	Protein Coding	38	GC02P169064	3.72	https://www.genecards.org/cgi-bin/carddisp.pl?gene=DHRS9
CEBPB	CCAAT Enhancer Binding Protein Beta	Protein Coding	45	GC20P050190	3.72	https://www.genecards.org/cgi-bin/carddisp.pl?gene=CEBPB
PTGER2	Prostaglandin E Receptor 2	Protein Coding	49	GC14P052314	3.72	https://www.genecards.org/cgi-bin/carddisp.pl?gene=PTGER2
FZD7	Frizzled Class Receptor 7	Protein Coding	45	GC02P202034	3.7	https://www.genecards.org/cgi-bin/carddisp.pl?gene=FZD7
MIR210	MicroRNA 210	RNA Gene	20	GC11M000569	3.69	https://www.genecards.org/cgi-bin/carddisp.pl?gene=MIR210
HSPA5	Heat Shock Protein Family A (Hsp70) Member 5	Protein Coding	48	GC09M125234	3.69	https://www.genecards.org/cgi-bin/carddisp.pl?gene=HSPA5
FZD1	Frizzled Class Receptor 1	Protein Coding	45	GC07P091264	3.68	https://www.genecards.org/cgi-bin/carddisp.pl?gene=FZD1
PSG2	Pregnancy Specific Beta-1-Glycoprotein 2	Protein Coding	37	GC19M043064	3.68	https://www.genecards.org/cgi-bin/carddisp.pl?gene=PSG2
MIR29C	MicroRNA 29c	RNA Gene	17	GC01M207802	3.66	https://www.genecards.org/cgi-bin/carddisp.pl?gene=MIR29C
MIR126	MicroRNA 126	RNA Gene	21	GC09P136670	3.66	https://www.genecards.org/cgi-bin/carddisp.pl?gene=MIR126
KLK3	Kallikrein Related Peptidase 3	Protein Coding	48	GC19P050854	3.65	https://www.genecards.org/cgi-bin/carddisp.pl?gene=KLK3
CEACAM6	CEA Cell Adhesion Molecule 6	Protein Coding	42	GC19P041750	3.65	https://www.genecards.org/cgi-bin/carddisp.pl?gene=CEACAM6
FOXO3	Forkhead Box O3	Protein Coding	45	GC06P108559	3.65	https://www.genecards.org/cgi-bin/carddisp.pl?gene=FOXO3
UGT1A3	UDP Glucuronosyltransferase Family 1 Member A3	Protein Coding	40	GC02P233729	3.64	https://www.genecards.org/cgi-bin/carddisp.pl?gene=UGT1A3
BAIAP2	BAR/IMD Domain Containing Adaptor Protein 2	Protein Coding	44	GC17P081035	3.64	https://www.genecards.org/cgi-bin/carddisp.pl?gene=BAIAP2
SIAH1	Siah E3 Ubiquitin Protein Ligase 1	Protein Coding	47	GC16M048357	3.64	https://www.genecards.org/cgi-bin/carddisp.pl?gene=SIAH1
HSPD1	Heat Shock Protein Family D (Hsp60) Member 1	Protein Coding	49	GC02M197486	3.6	https://www.genecards.org/cgi-bin/carddisp.pl?gene=HSPD1
AURKB	Aurora Kinase B	Protein Coding	50	GC17M008676	3.6	https://www.genecards.org/cgi-bin/carddisp.pl?gene=AURKB
BID	BH3 Interacting Domain Death Agonist	Protein Coding	47	GC22M017734	3.6	https://www.genecards.org/cgi-bin/carddisp.pl?gene=BID
HSPA9	Heat Shock Protein Family A (Hsp70) Member 9	Protein Coding	48	GC05M138554	3.6	https://www.genecards.org/cgi-bin/carddisp.pl?gene=HSPA9
RPS6KB1	Ribosomal Protein S6 Kinase B1	Protein Coding	50	GC17P059893	3.57	https://www.genecards.org/cgi-bin/carddisp.pl?gene=RPS6KB1
CEACAM1	CEA Cell Adhesion Molecule 1	Protein Coding	44	GC19M042507	3.56	https://www.genecards.org/cgi-bin/carddisp.pl?gene=CEACAM1
TRAF1	TNF Receptor Associated Factor 1	Protein Coding	44	GC09M120902	3.56	https://www.genecards.org/cgi-bin/carddisp.pl?gene=TRAF1
OIP5-AS1	OIP5 Antisense RNA 1	RNA Gene	17	GC15P041283	3.55	https://www.genecards.org/cgi-bin/carddisp.pl?gene=OIP5-AS1
PRKDC	Protein Kinase, DNA-Activated, Catalytic Subunit	Protein Coding	50	GC08M047773	3.53	https://www.genecards.org/cgi-bin/carddisp.pl?gene=PRKDC
MST1R	Macrophage Stimulating 1 Receptor	Protein Coding	49	GC03M049888	3.52	https://www.genecards.org/cgi-bin/carddisp.pl?gene=MST1R
TCF3	Transcription Factor 3	Protein Coding	47	GC19M001609	3.51	https://www.genecards.org/cgi-bin/carddisp.pl?gene=TCF3
KIF2C	Kinesin Family Member 2C	Protein Coding	43	GC01P044739	3.51	https://www.genecards.org/cgi-bin/carddisp.pl?gene=KIF2C
ZEB1	Zinc Finger E-Box Binding Homeobox 1	Protein Coding	49	GC10P031318	3.51	https://www.genecards.org/cgi-bin/carddisp.pl?gene=ZEB1
RDH5	Retinol Dehydrogenase 5	Protein Coding	47	GC12P055720	3.51	https://www.genecards.org/cgi-bin/carddisp.pl?gene=RDH5
CYP27B1	Cytochrome P450 Family 27 Subfamily B Member 1	Protein Coding	48	GC12M057757	3.5	https://www.genecards.org/cgi-bin/carddisp.pl?gene=CYP27B1
MIR155	MicroRNA 155	RNA Gene	17	GC21P025573	3.49	https://www.genecards.org/cgi-bin/carddisp.pl?gene=MIR155
DLG2	Discs Large MAGUK Scaffold Protein 2	Protein Coding	42	GC11M083455	3.49	https://www.genecards.org/cgi-bin/carddisp.pl?gene=DLG2
PTGER3	Prostaglandin E Receptor 3	Protein Coding	47	GC01M070852	3.49	https://www.genecards.org/cgi-bin/carddisp.pl?gene=PTGER3
CDO1	Cysteine Dioxygenase Type 1	Protein Coding	43	GC05M115804	3.48	https://www.genecards.org/cgi-bin/carddisp.pl?gene=CDO1
INHBA	Inhibin Subunit Beta A	Protein Coding	45	GC07M041668	3.48	https://www.genecards.org/cgi-bin/carddisp.pl?gene=INHBA
RXRA	Retinoid X Receptor Alpha	Protein Coding	50	GC09P134317	3.48	https://www.genecards.org/cgi-bin/carddisp.pl?gene=RXRA
DNAJA3	DnaJ Heat Shock Protein Family (Hsp40) Member A3	Protein Coding	41	GC16P004425	3.48	https://www.genecards.org/cgi-bin/carddisp.pl?gene=DNAJA3
RB1CC1	RB1 Inducible Coiled-Coil 1	Protein Coding	45	GC08M052622	3.47	https://www.genecards.org/cgi-bin/carddisp.pl?gene=RB1CC1
HMGA1	High Mobility Group AT-Hook 1	Protein Coding	46	GC06P043313	3.46	https://www.genecards.org/cgi-bin/carddisp.pl?gene=HMGA1
EFNB2	Ephrin B2	Protein Coding	45	GC13M106489	3.45	https://www.genecards.org/cgi-bin/carddisp.pl?gene=EFNB2
BUB3	BUB3 Mitotic Checkpoint Protein	Protein Coding	48	GC10P123154	3.45	https://www.genecards.org/cgi-bin/carddisp.pl?gene=BUB3
LRP6	LDL Receptor Related Protein 6	Protein Coding	49	GC12M012814	3.44	https://www.genecards.org/cgi-bin/carddisp.pl?gene=LRP6
HPN	Hepsin	Protein Coding	43	GC19P035040	3.44	https://www.genecards.org/cgi-bin/carddisp.pl?gene=HPN
EXT2	Exostosin Glycosyltransferase 2	Protein Coding	47	GC11P044095	3.43	https://www.genecards.org/cgi-bin/carddisp.pl?gene=EXT2
EMD	Emerin	Protein Coding	46	GC0XP154379	3.43	https://www.genecards.org/cgi-bin/carddisp.pl?gene=EMD
PTGER4	Prostaglandin E Receptor 4	Protein Coding	48	GC05P040679	3.42	https://www.genecards.org/cgi-bin/carddisp.pl?gene=PTGER4
UBE2D1	Ubiquitin Conjugating Enzyme E2 D1	Protein Coding	46	GC10P058334	3.41	https://www.genecards.org/cgi-bin/carddisp.pl?gene=UBE2D1
RETREG1	Reticulophagy Regulator 1	Protein Coding	32	GC05M016472	3.4	https://www.genecards.org/cgi-bin/carddisp.pl?gene=RETREG1
PRKD1	Protein Kinase D1	Protein Coding	50	GC14M029576	3.39	https://www.genecards.org/cgi-bin/carddisp.pl?gene=PRKD1
PPP2R5C	Protein Phosphatase 2 Regulatory Subunit B'Gamma	Protein Coding	44	GC14P104214	3.39	https://www.genecards.org/cgi-bin/carddisp.pl?gene=PPP2R5C
TUBG1	Tubulin Gamma 1	Protein Coding	49	GC17P042609	3.39	https://www.genecards.org/cgi-bin/carddisp.pl?gene=TUBG1
CSNK2A2	Casein Kinase 2 Alpha 2	Protein Coding	48	GC16M058157	3.39	https://www.genecards.org/cgi-bin/carddisp.pl?gene=CSNK2A2
PPP2R5B	Protein Phosphatase 2 Regulatory Subunit B'Beta	Protein Coding	41	GC11P064918	3.38	https://www.genecards.org/cgi-bin/carddisp.pl?gene=PPP2R5B
THBS1	Thrombospondin 1	Protein Coding	46	GC15P039581	3.37	https://www.genecards.org/cgi-bin/carddisp.pl?gene=THBS1
UGT2B4	UDP Glucuronosyltransferase Family 2 Member B4	Protein Coding	41	GC04M069484	3.35	https://www.genecards.org/cgi-bin/carddisp.pl?gene=UGT2B4
GRK2	G Protein-Coupled Receptor Kinase 2	Protein Coding	38	GC11P067266	3.35	https://www.genecards.org/cgi-bin/carddisp.pl?gene=GRK2
TNFAIP3	TNF Alpha Induced Protein 3	Protein Coding	49	GC06P137866	3.34	https://www.genecards.org/cgi-bin/carddisp.pl?gene=TNFAIP3
ERCC2	ERCC Excision Repair 2, TFIIH Core Complex Helicase Subunit	Protein Coding	48	GC19M045349	3.34	https://www.genecards.org/cgi-bin/carddisp.pl?gene=ERCC2
EXT1	Exostosin Glycosyltransferase 1	Protein Coding	49	GC08M117798	3.34	https://www.genecards.org/cgi-bin/carddisp.pl?gene=EXT1
ARHGEF2	Rho/Rac Guanine Nucleotide Exchange Factor 2	Protein Coding	46	GC01M155946	3.33	https://www.genecards.org/cgi-bin/carddisp.pl?gene=ARHGEF2
TP53BP2	Tumor Protein P53 Binding Protein 2	Protein Coding	44	GC01M223779	3.31	https://www.genecards.org/cgi-bin/carddisp.pl?gene=TP53BP2
ANXA1	Annexin A1	Protein Coding	50	GC09P073151	3.31	https://www.genecards.org/cgi-bin/carddisp.pl?gene=ANXA1
APCDD1	APC Down-Regulated 1	Protein Coding	40	GC18P010444	3.31	https://www.genecards.org/cgi-bin/carddisp.pl?gene=APCDD1
SLC12A5	Solute Carrier Family 12 Member 5	Protein Coding	49	GC20P046021	3.29	https://www.genecards.org/cgi-bin/carddisp.pl?gene=SLC12A5
COPS5	COP9 Signalosome Subunit 5	Protein Coding	43	GC08M067043	3.28	https://www.genecards.org/cgi-bin/carddisp.pl?gene=COPS5
RPA2	Replication Protein A2	Protein Coding	46	GC01M027902	3.28	https://www.genecards.org/cgi-bin/carddisp.pl?gene=RPA2
STRN	Striatin	Protein Coding	40	GC02M036815	3.27	https://www.genecards.org/cgi-bin/carddisp.pl?gene=STRN
BAG1	BCL2 Associated Athanogene 1	Protein Coding	44	GC09M033245	3.25	https://www.genecards.org/cgi-bin/carddisp.pl?gene=BAG1
IGF2R	Insulin Like Growth Factor 2 Receptor	Protein Coding	47	GC06P159969	3.24	https://www.genecards.org/cgi-bin/carddisp.pl?gene=IGF2R
MAD2L1	Mitotic Arrest Deficient 2 Like 1	Protein Coding	45	GC04M120055	3.24	https://www.genecards.org/cgi-bin/carddisp.pl?gene=MAD2L1
NAT1	N-Acetyltransferase 1	Protein Coding	46	GC08P018181	3.22	https://www.genecards.org/cgi-bin/carddisp.pl?gene=NAT1
LGALS1	Galectin 1	Protein Coding	45	GC22P037675	3.22	https://www.genecards.org/cgi-bin/carddisp.pl?gene=LGALS1
AMER2	APC Membrane Recruitment Protein 2	Protein Coding	33	GC13M025161	3.21	https://www.genecards.org/cgi-bin/carddisp.pl?gene=AMER2
GDF15	Growth Differentiation Factor 15	Protein Coding	43	GC19P020745	3.21	https://www.genecards.org/cgi-bin/carddisp.pl?gene=GDF15
KRT18	Keratin 18	Protein Coding	50	GC12P052948	3.2	https://www.genecards.org/cgi-bin/carddisp.pl?gene=KRT18
SIRT1	Sirtuin 1	Protein Coding	50	GC10P067884	3.2	https://www.genecards.org/cgi-bin/carddisp.pl?gene=SIRT1
LEPR	Leptin Receptor	Protein Coding	50	GC01P065421	3.19	https://www.genecards.org/cgi-bin/carddisp.pl?gene=LEPR
NTN1	Netrin 1	Protein Coding	46	GC17P009021	3.19	https://www.genecards.org/cgi-bin/carddisp.pl?gene=NTN1
TUBA1B	Tubulin Alpha 1b	Protein Coding	43	GC12M049127	3.17	https://www.genecards.org/cgi-bin/carddisp.pl?gene=TUBA1B
RBX1	Ring-Box 1	Protein Coding	44	GC22P040951	3.15	https://www.genecards.org/cgi-bin/carddisp.pl?gene=RBX1
PTPA	Protein Phosphatase 2 Phosphatase Activator	Protein Coding	35	GC09P129111	3.14	https://www.genecards.org/cgi-bin/carddisp.pl?gene=PTPA
KRT1	Keratin 1	Protein Coding	46	GC12M052674	3.14	https://www.genecards.org/cgi-bin/carddisp.pl?gene=KRT1
FZD2	Frizzled Class Receptor 2	Protein Coding	49	GC17P044557	3.12	https://www.genecards.org/cgi-bin/carddisp.pl?gene=FZD2
TCF7	Transcription Factor 7	Protein Coding	45	GC05P134114	3.12	https://www.genecards.org/cgi-bin/carddisp.pl?gene=TCF7
NTS	Neurotensin	Protein Coding	41	GC12P085876	3.12	https://www.genecards.org/cgi-bin/carddisp.pl?gene=NTS
MIF	Macrophage Migration Inhibitory Factor	Protein Coding	50	GC22P023894	3.12	https://www.genecards.org/cgi-bin/carddisp.pl?gene=MIF
TRPS1	Transcriptional Repressor GATA Binding 1	Protein Coding	46	GC08M115408	3.12	https://www.genecards.org/cgi-bin/carddisp.pl?gene=TRPS1
PIN1	Peptidylprolyl Cis/Trans Isomerase, NIMA-Interacting 1	Protein Coding	48	GC19P009835	3.12	https://www.genecards.org/cgi-bin/carddisp.pl?gene=PIN1
GLUL	Glutamate-Ammonia Ligase	Protein Coding	50	GC01M182350	3.11	https://www.genecards.org/cgi-bin/carddisp.pl?gene=GLUL
NR4A1	Nuclear Receptor Subfamily 4 Group A Member 1	Protein Coding	48	GC12P052022	3.1	https://www.genecards.org/cgi-bin/carddisp.pl?gene=NR4A1
MAP3K7	Mitogen-Activated Protein Kinase Kinase Kinase 7	Protein Coding	52	GC06M090513	3.1	https://www.genecards.org/cgi-bin/carddisp.pl?gene=MAP3K7
PTGER1	Prostaglandin E Receptor 1	Protein Coding	41	GC19M014444	3.09	https://www.genecards.org/cgi-bin/carddisp.pl?gene=PTGER1
FGF9	Fibroblast Growth Factor 9	Protein Coding	45	GC13P021671	3.09	https://www.genecards.org/cgi-bin/carddisp.pl?gene=FGF9
IL1RL1	Interleukin 1 Receptor Like 1	Protein Coding	42	GC02P102294	3.08	https://www.genecards.org/cgi-bin/carddisp.pl?gene=IL1RL1
SOX9	SRY-Box Transcription Factor 9	Protein Coding	48	GC17P072121	3.07	https://www.genecards.org/cgi-bin/carddisp.pl?gene=SOX9
AMER3	APC Membrane Recruitment Protein 3	Protein Coding	32	GC02P131770	3.05	https://www.genecards.org/cgi-bin/carddisp.pl?gene=AMER3
MIR34C	MicroRNA 34c	RNA Gene	20	GC11P111571	3.05	https://www.genecards.org/cgi-bin/carddisp.pl?gene=MIR34C
ATF4	Activating Transcription Factor 4	Protein Coding	48	GC22P039519	3.04	https://www.genecards.org/cgi-bin/carddisp.pl?gene=ATF4
ASAP1	ArfGAP With SH3 Domain, Ankyrin Repeat And PH Domain 1	Protein Coding	40	GC08M130052	3.04	https://www.genecards.org/cgi-bin/carddisp.pl?gene=ASAP1
TMEFF2	Transmembrane Protein With EGF Like And Two Follistatin Like Domains 2	Protein Coding	41	GC02M191950	3.03	https://www.genecards.org/cgi-bin/carddisp.pl?gene=TMEFF2
ITGA3	Integrin Subunit Alpha 3	Protein Coding	48	GC17P050055	3.03	https://www.genecards.org/cgi-bin/carddisp.pl?gene=ITGA3
ACTN4	Actinin Alpha 4	Protein Coding	48	GC19P038647	3.02	https://www.genecards.org/cgi-bin/carddisp.pl?gene=ACTN4
PLCE1	Phospholipase C Epsilon 1	Protein Coding	45	GC10P093993	3.02	https://www.genecards.org/cgi-bin/carddisp.pl?gene=PLCE1
CXCL1	C-X-C Motif Chemokine Ligand 1	Protein Coding	44	GC04P073869	3.01	https://www.genecards.org/cgi-bin/carddisp.pl?gene=CXCL1
TJP1	Tight Junction Protein 1	Protein Coding	45	GC15M029699	3.01	https://www.genecards.org/cgi-bin/carddisp.pl?gene=TJP1
WASL	WASP Like Actin Nucleation Promoting Factor	Protein Coding	43	GC07M123681	3	https://www.genecards.org/cgi-bin/carddisp.pl?gene=WASL
FZD9	Frizzled Class Receptor 9	Protein Coding	45	GC07P073433	3	https://www.genecards.org/cgi-bin/carddisp.pl?gene=FZD9
FOXP3	Forkhead Box P3	Protein Coding	48	GC0XM049250	3	https://www.genecards.org/cgi-bin/carddisp.pl?gene=FOXP3
ABL2	ABL Proto-Oncogene 2, Non-Receptor Tyrosine Kinase	Protein Coding	47	GC01M179104	2.99	https://www.genecards.org/cgi-bin/carddisp.pl?gene=ABL2
CFLAR	CASP8 And FADD Like Apoptosis Regulator	Protein Coding	48	GC02P201117	2.99	https://www.genecards.org/cgi-bin/carddisp.pl?gene=CFLAR
CYP2E1	Cytochrome P450 Family 2 Subfamily E Member 1	Protein Coding	46	GC10P133520	2.98	https://www.genecards.org/cgi-bin/carddisp.pl?gene=CYP2E1
ID2	Inhibitor Of DNA Binding 2	Protein Coding	45	GC02P008772	2.98	https://www.genecards.org/cgi-bin/carddisp.pl?gene=ID2
MAP3K1	Mitogen-Activated Protein Kinase Kinase Kinase 1	Protein Coding	50	GC05P056815	2.97	https://www.genecards.org/cgi-bin/carddisp.pl?gene=MAP3K1
MIR34B	MicroRNA 34b	RNA Gene	20	GC11P111570	2.97	https://www.genecards.org/cgi-bin/carddisp.pl?gene=MIR34B
PPP2CB	Protein Phosphatase 2 Catalytic Subunit Beta	Protein Coding	46	GC08M030762	2.97	https://www.genecards.org/cgi-bin/carddisp.pl?gene=PPP2CB
STRN3	Striatin 3	Protein Coding	38	GC14M030893	2.97	https://www.genecards.org/cgi-bin/carddisp.pl?gene=STRN3
MIR663A	MicroRNA 663a	RNA Gene	14	GC20M026189	2.96	https://www.genecards.org/cgi-bin/carddisp.pl?gene=MIR663A
TNKS	Tankyrase	Protein Coding	45	GC08P009555	2.96	https://www.genecards.org/cgi-bin/carddisp.pl?gene=TNKS
BLZF1	Basic Leucine Zipper Nuclear Factor 1	Protein Coding	39	GC01P169367	2.96	https://www.genecards.org/cgi-bin/carddisp.pl?gene=BLZF1
BMPR1B	Bone Morphogenetic Protein Receptor Type 1B	Protein Coding	51	GC04P094757	2.96	https://www.genecards.org/cgi-bin/carddisp.pl?gene=BMPR1B
RARA	Retinoic Acid Receptor Alpha	Protein Coding	52	GC17P040309	2.95	https://www.genecards.org/cgi-bin/carddisp.pl?gene=RARA
G6PD	Glucose-6-Phosphate Dehydrogenase	Protein Coding	52	GC0XM154531	2.95	https://www.genecards.org/cgi-bin/carddisp.pl?gene=G6PD
CCL26	C-C Motif Chemokine Ligand 26	Protein Coding	39	GC07M075769	2.95	https://www.genecards.org/cgi-bin/carddisp.pl?gene=CCL26
KLRK1	Killer Cell Lectin Like Receptor K1	Protein Coding	41	GC12M012787	2.94	https://www.genecards.org/cgi-bin/carddisp.pl?gene=KLRK1
ITGAL	Integrin Subunit Alpha L	Protein Coding	47	GC16P030472	2.94	https://www.genecards.org/cgi-bin/carddisp.pl?gene=ITGAL
CD80	CD80 Molecule	Protein Coding	43	GC03M119524	2.93	https://www.genecards.org/cgi-bin/carddisp.pl?gene=CD80
TAS2R38	Taste 2 Receptor Member 38	Protein Coding	37	GC07M141972	2.93	https://www.genecards.org/cgi-bin/carddisp.pl?gene=TAS2R38
SRP19	Signal Recognition Particle 19	Protein Coding	37	GC05P112862	2.92	https://www.genecards.org/cgi-bin/carddisp.pl?gene=SRP19
PCNT	Pericentrin	Protein Coding	43	GC21P046324	2.92	https://www.genecards.org/cgi-bin/carddisp.pl?gene=PCNT
GSTA1	Glutathione S-Transferase Alpha 1	Protein Coding	43	GC06M052791	2.92	https://www.genecards.org/cgi-bin/carddisp.pl?gene=GSTA1
TRIM21	Tripartite Motif Containing 21	Protein Coding	44	GC11M004384	2.91	https://www.genecards.org/cgi-bin/carddisp.pl?gene=TRIM21
RANBP2	RAN Binding Protein 2	Protein Coding	48	GC02P108719	2.91	https://www.genecards.org/cgi-bin/carddisp.pl?gene=RANBP2
CSNK2B	Casein Kinase 2 Beta	Protein Coding	48	GC06P032609	2.9	https://www.genecards.org/cgi-bin/carddisp.pl?gene=CSNK2B
CGA	Glycoprotein Hormones, Alpha Polypeptide	Protein Coding	44	GC06M087085	2.89	https://www.genecards.org/cgi-bin/carddisp.pl?gene=CGA
H3C1	H3 Clustered Histone 1	Protein Coding	33	GC06P026024	2.88	https://www.genecards.org/cgi-bin/carddisp.pl?gene=H3C1
TUBB	Tubulin Beta Class I	Protein Coding	50	GC06P030720	2.88	https://www.genecards.org/cgi-bin/carddisp.pl?gene=TUBB
GNA12	G Protein Subunit Alpha 12	Protein Coding	42	GC07M002728	2.88	https://www.genecards.org/cgi-bin/carddisp.pl?gene=GNA12
CUL1	Cullin 1	Protein Coding	46	GC07P148697	2.86	https://www.genecards.org/cgi-bin/carddisp.pl?gene=CUL1
SRSF1	Serine And Arginine Rich Splicing Factor 1	Protein Coding	43	GC17M058000	2.86	https://www.genecards.org/cgi-bin/carddisp.pl?gene=SRSF1
IGFBP2	Insulin Like Growth Factor Binding Protein 2	Protein Coding	45	GC02P216632	2.84	https://www.genecards.org/cgi-bin/carddisp.pl?gene=IGFBP2
FZD10	Frizzled Class Receptor 10	Protein Coding	44	GC12P130162	2.83	https://www.genecards.org/cgi-bin/carddisp.pl?gene=FZD10
ORM1	Orosomucoid 1	Protein Coding	41	GC09P114323	2.83	https://www.genecards.org/cgi-bin/carddisp.pl?gene=ORM1
HUWE1	HECT, UBA And WWE Domain Containing E3 Ubiquitin Protein Ligase 1	Protein Coding	46	GC0XM053532	2.82	https://www.genecards.org/cgi-bin/carddisp.pl?gene=HUWE1
ATAD2	ATPase Family AAA Domain Containing 2	Protein Coding	40	GC08M123319	2.82	https://www.genecards.org/cgi-bin/carddisp.pl?gene=ATAD2
S100A9	S100 Calcium Binding Protein A9	Protein Coding	45	GC01P153357	2.81	https://www.genecards.org/cgi-bin/carddisp.pl?gene=S100A9
ATP6AP2	ATPase H+ Transporting Accessory Protein 2	Protein Coding	45	GC0XP040582	2.81	https://www.genecards.org/cgi-bin/carddisp.pl?gene=ATP6AP2
LRRFIP2	LRR Binding FLII Interacting Protein 2	Protein Coding	38	GC03M037052	2.8	https://www.genecards.org/cgi-bin/carddisp.pl?gene=LRRFIP2
SCGB1A1	Secretoglobin Family 1A Member 1	Protein Coding	41	GC11P062405	2.79	https://www.genecards.org/cgi-bin/carddisp.pl?gene=SCGB1A1
PTPRJ	Protein Tyrosine Phosphatase Receptor Type J	Protein Coding	48	GC11P048002	2.79	https://www.genecards.org/cgi-bin/carddisp.pl?gene=PTPRJ
KCTD1	Potassium Channel Tetramerization Domain Containing 1	Protein Coding	41	GC18M026454	2.79	https://www.genecards.org/cgi-bin/carddisp.pl?gene=KCTD1
CTNND2	Catenin Delta 2	Protein Coding	44	GC05M010971	2.79	https://www.genecards.org/cgi-bin/carddisp.pl?gene=CTNND2
SEPTIN9	Septin 9	Protein Coding	34	GC17P077282	2.78	https://www.genecards.org/cgi-bin/carddisp.pl?gene=SEPTIN9
APOH	Apolipoprotein H	Protein Coding	45	GC17M066212	2.75	https://www.genecards.org/cgi-bin/carddisp.pl?gene=APOH
PSG9	Pregnancy Specific Beta-1-Glycoprotein 9	Protein Coding	36	GC19M043212	2.74	https://www.genecards.org/cgi-bin/carddisp.pl?gene=PSG9
TIAM1	T Cell Lymphoma Invasion And Metastasis 1	Protein Coding	46	GC21M031118	2.74	https://www.genecards.org/cgi-bin/carddisp.pl?gene=TIAM1
CDK8	Cyclin Dependent Kinase 8	Protein Coding	49	GC13P026254	2.74	https://www.genecards.org/cgi-bin/carddisp.pl?gene=CDK8
CDH5	Cadherin 5	Protein Coding	49	GC16P066366	2.74	https://www.genecards.org/cgi-bin/carddisp.pl?gene=CDH5
PKM	Pyruvate Kinase M1/2	Protein Coding	47	GC15M072199	2.74	https://www.genecards.org/cgi-bin/carddisp.pl?gene=PKM
SFRP4	Secreted Frizzled Related Protein 4	Protein Coding	45	GC07M037912	2.73	https://www.genecards.org/cgi-bin/carddisp.pl?gene=SFRP4
PDPK1	3-Phosphoinositide Dependent Protein Kinase 1	Protein Coding	50	GC16P002537	2.73	https://www.genecards.org/cgi-bin/carddisp.pl?gene=PDPK1
CD9	CD9 Molecule	Protein Coding	45	GC12P006313	2.72	https://www.genecards.org/cgi-bin/carddisp.pl?gene=CD9
TLE1	TLE Family Member 1, Transcriptional Corepressor	Protein Coding	45	GC09M081583	2.72	https://www.genecards.org/cgi-bin/carddisp.pl?gene=TLE1
CAPN2	Calpain 2	Protein Coding	48	GC01P223701	2.72	https://www.genecards.org/cgi-bin/carddisp.pl?gene=CAPN2
GUK1	Guanylate Kinase 1	Protein Coding	43	GC01P228139	2.71	https://www.genecards.org/cgi-bin/carddisp.pl?gene=GUK1
IL10RA	Interleukin 10 Receptor Subunit Alpha	Protein Coding	46	GC11P117987	2.71	https://www.genecards.org/cgi-bin/carddisp.pl?gene=IL10RA
MIR494	MicroRNA 494	RNA Gene	17	GC14P104130	2.71	https://www.genecards.org/cgi-bin/carddisp.pl?gene=MIR494
USP7	Ubiquitin Specific Peptidase 7	Protein Coding	49	GC16M008892	2.71	https://www.genecards.org/cgi-bin/carddisp.pl?gene=USP7
PAQR3	Progestin And AdipoQ Receptor Family Member 3	Protein Coding	36	GC04M078887	2.69	https://www.genecards.org/cgi-bin/carddisp.pl?gene=PAQR3
TRIM32	Tripartite Motif Containing 32	Protein Coding	44	GC09P116687	2.69	https://www.genecards.org/cgi-bin/carddisp.pl?gene=TRIM32
STRN4	Striatin 4	Protein Coding	36	GC19M046719	2.69	https://www.genecards.org/cgi-bin/carddisp.pl?gene=STRN4
USP15	Ubiquitin Specific Peptidase 15	Protein Coding	48	GC12P062260	2.68	https://www.genecards.org/cgi-bin/carddisp.pl?gene=USP15
HELLS	Helicase, Lymphoid Specific	Protein Coding	46	GC10P094501	2.68	https://www.genecards.org/cgi-bin/carddisp.pl?gene=HELLS
KIF3B	Kinesin Family Member 3B	Protein Coding	41	GC20P032277	2.67	https://www.genecards.org/cgi-bin/carddisp.pl?gene=KIF3B
LMNB1	Lamin B1	Protein Coding	48	GC05P126776	2.67	https://www.genecards.org/cgi-bin/carddisp.pl?gene=LMNB1
ARSH	Arylsulfatase Family Member H	Protein Coding	36	GC0XP003006	2.67	https://www.genecards.org/cgi-bin/carddisp.pl?gene=ARSH
FAM215A	Family With Sequence Similarity 215 Member A	RNA Gene	24	GC17P043917	2.66	https://www.genecards.org/cgi-bin/carddisp.pl?gene=FAM215A
CTBP2	C-Terminal Binding Protein 2	Protein Coding	45	GC10M124984	2.66	https://www.genecards.org/cgi-bin/carddisp.pl?gene=CTBP2
MUC3A	Mucin 3A, Cell Surface Associated	Protein Coding	36	GC07P100949	2.66	https://www.genecards.org/cgi-bin/carddisp.pl?gene=MUC3A
COPS8	COP9 Signalosome Subunit 8	Protein Coding	37	GC02P237085	2.66	https://www.genecards.org/cgi-bin/carddisp.pl?gene=COPS8
RAD21	RAD21 Cohesin Complex Component	Protein Coding	46	GC08M116846	2.65	https://www.genecards.org/cgi-bin/carddisp.pl?gene=RAD21
AMACR	Alpha-Methylacyl-CoA Racemase	Protein Coding	46	GC05M033986	2.64	https://www.genecards.org/cgi-bin/carddisp.pl?gene=AMACR
CUL4B	Cullin 4B	Protein Coding	45	GC0XM120524	2.64	https://www.genecards.org/cgi-bin/carddisp.pl?gene=CUL4B
ALPG	Alkaline Phosphatase, Germ Cell	Protein Coding	33	GC02P232407	2.63	https://www.genecards.org/cgi-bin/carddisp.pl?gene=ALPG
CCNB3	Cyclin B3	Protein Coding	37	GC0XP050202	2.63	https://www.genecards.org/cgi-bin/carddisp.pl?gene=CCNB3
ROR2	Receptor Tyrosine Kinase Like Orphan Receptor 2	Protein Coding	49	GC09M091564	2.63	https://www.genecards.org/cgi-bin/carddisp.pl?gene=ROR2
SFRP2	Secreted Frizzled Related Protein 2	Protein Coding	44	GC04M153780	2.62	https://www.genecards.org/cgi-bin/carddisp.pl?gene=SFRP2
HP	Haptoglobin	Protein Coding	45	GC16P072089	2.62	https://www.genecards.org/cgi-bin/carddisp.pl?gene=HP
CDC27	Cell Division Cycle 27	Protein Coding	43	GC17M047117	2.62	https://www.genecards.org/cgi-bin/carddisp.pl?gene=CDC27
SI	Sucrase-Isomaltase	Protein Coding	45	GC03M164978	2.61	https://www.genecards.org/cgi-bin/carddisp.pl?gene=SI
DIAPH1	Diaphanous Related Formin 1	Protein Coding	48	GC05M141477	2.61	https://www.genecards.org/cgi-bin/carddisp.pl?gene=DIAPH1
PRKCZ	Protein Kinase C Zeta	Protein Coding	49	GC01P002050	2.6	https://www.genecards.org/cgi-bin/carddisp.pl?gene=PRKCZ
LGR5	Leucine Rich Repeat Containing G Protein-Coupled Receptor 5	Protein Coding	44	GC12P071439	2.59	https://www.genecards.org/cgi-bin/carddisp.pl?gene=LGR5
PPP1R15A	Protein Phosphatase 1 Regulatory Subunit 15A	Protein Coding	40	GC19P048872	2.59	https://www.genecards.org/cgi-bin/carddisp.pl?gene=PPP1R15A
PTTG1	PTTG1 Regulator Of Sister Chromatid Separation, Securin	Protein Coding	44	GC05P160422	2.58	https://www.genecards.org/cgi-bin/carddisp.pl?gene=PTTG1
DCTN2	Dynactin Subunit 2	Protein Coding	42	GC12M057530	2.57	https://www.genecards.org/cgi-bin/carddisp.pl?gene=DCTN2
YY1	YY1 Transcription Factor	Protein Coding	49	GC14P100238	2.57	https://www.genecards.org/cgi-bin/carddisp.pl?gene=YY1
CEACAM4	CEA Cell Adhesion Molecule 4	Protein Coding	33	GC19M041618	2.57	https://www.genecards.org/cgi-bin/carddisp.pl?gene=CEACAM4
MKRN1	Makorin Ring Finger Protein 1	Protein Coding	40	GC07M140453	2.56	https://www.genecards.org/cgi-bin/carddisp.pl?gene=MKRN1
SLC9A3R2	SLC9A3 Regulator 2	Protein Coding	41	GC16P002343	2.55	https://www.genecards.org/cgi-bin/carddisp.pl?gene=SLC9A3R2
SCRIB	Scribble Planar Cell Polarity Protein	Protein Coding	42	GC08M143802	2.54	https://www.genecards.org/cgi-bin/carddisp.pl?gene=SCRIB
STRIP1	Striatin Interacting Protein 1	Protein Coding	33	GC01P110032	2.54	https://www.genecards.org/cgi-bin/carddisp.pl?gene=STRIP1
AMD1	Adenosylmethionine Decarboxylase 1	Protein Coding	45	GC06P110814	2.53	https://www.genecards.org/cgi-bin/carddisp.pl?gene=AMD1
FER	FER Tyrosine Kinase	Protein Coding	48	GC05P108747	2.52	https://www.genecards.org/cgi-bin/carddisp.pl?gene=FER
HPGD	15-Hydroxyprostaglandin Dehydrogenase	Protein Coding	49	GC04M174490	2.51	https://www.genecards.org/cgi-bin/carddisp.pl?gene=HPGD
TDGF1	Teratocarcinoma-Derived Growth Factor 1	Protein Coding	43	GC03P046576	2.48	https://www.genecards.org/cgi-bin/carddisp.pl?gene=TDGF1
UBR5	Ubiquitin Protein Ligase E3 Component N-Recognin 5	Protein Coding	43	GC08M102252	2.48	https://www.genecards.org/cgi-bin/carddisp.pl?gene=UBR5
RGS4	Regulator Of G Protein Signaling 4	Protein Coding	44	GC01P163038	2.47	https://www.genecards.org/cgi-bin/carddisp.pl?gene=RGS4
IRS2	Insulin Receptor Substrate 2	Protein Coding	45	GC13M109752	2.47	https://www.genecards.org/cgi-bin/carddisp.pl?gene=IRS2
DUSP19	Dual Specificity Phosphatase 19	Protein Coding	40	GC02P183078	2.47	https://www.genecards.org/cgi-bin/carddisp.pl?gene=DUSP19
GNA13	G Protein Subunit Alpha 13	Protein Coding	44	GC17M065009	2.47	https://www.genecards.org/cgi-bin/carddisp.pl?gene=GNA13
ID1	Inhibitor Of DNA Binding 1, HLH Protein	Protein Coding	43	GC20P031605	2.45	https://www.genecards.org/cgi-bin/carddisp.pl?gene=ID1
GSK3A	Glycogen Synthase Kinase 3 Alpha	Protein Coding	50	GC19M042230	2.44	https://www.genecards.org/cgi-bin/carddisp.pl?gene=GSK3A
SLMAP	Sarcolemma Associated Protein	Protein Coding	40	GC03P057758	2.44	https://www.genecards.org/cgi-bin/carddisp.pl?gene=SLMAP
PDE4B	Phosphodiesterase 4B	Protein Coding	45	GC01P065792	2.44	https://www.genecards.org/cgi-bin/carddisp.pl?gene=PDE4B
HSPH1	Heat Shock Protein Family H (Hsp110) Member 1	Protein Coding	44	GC13M031134	2.43	https://www.genecards.org/cgi-bin/carddisp.pl?gene=HSPH1
NFIC	Nuclear Factor I C	Protein Coding	41	GC19P003314	2.43	https://www.genecards.org/cgi-bin/carddisp.pl?gene=NFIC
CD82	CD82 Molecule	Protein Coding	44	GC11P044586	2.43	https://www.genecards.org/cgi-bin/carddisp.pl?gene=CD82
CCN4	Cellular Communication Network Factor 4	Protein Coding	32	GC08P133192	2.41	https://www.genecards.org/cgi-bin/carddisp.pl?gene=CCN4
CCL7	C-C Motif Chemokine Ligand 7	Protein Coding	43	GC17P034270	2.41	https://www.genecards.org/cgi-bin/carddisp.pl?gene=CCL7
MIR135A1	MicroRNA 135a-1	RNA Gene	18	GC03M052296	2.4	https://www.genecards.org/cgi-bin/carddisp.pl?gene=MIR135A1
CDC25A	Cell Division Cycle 25A	Protein Coding	49	GC03M048173	2.4	https://www.genecards.org/cgi-bin/carddisp.pl?gene=CDC25A
HOXC13	Homeobox C13	Protein Coding	42	GC12P053938	2.4	https://www.genecards.org/cgi-bin/carddisp.pl?gene=HOXC13
SRSF6	Serine And Arginine Rich Splicing Factor 6	Protein Coding	40	GC20P043457	2.39	https://www.genecards.org/cgi-bin/carddisp.pl?gene=SRSF6
CDK5RAP2	CDK5 Regulatory Subunit Associated Protein 2	Protein Coding	43	GC09M120388	2.39	https://www.genecards.org/cgi-bin/carddisp.pl?gene=CDK5RAP2
DLGAP1	DLG Associated Protein 1	Protein Coding	44	GC18M003488	2.38	https://www.genecards.org/cgi-bin/carddisp.pl?gene=DLGAP1
PLA2G10	Phospholipase A2 Group X	Protein Coding	45	GC16M014672	2.38	https://www.genecards.org/cgi-bin/carddisp.pl?gene=PLA2G10
ROCK1	Rho Associated Coiled-Coil Containing Protein Kinase 1	Protein Coding	50	GC18M020946	2.37	https://www.genecards.org/cgi-bin/carddisp.pl?gene=ROCK1
WIPF1	WAS/WASL Interacting Protein Family Member 1	Protein Coding	45	GC02M174559	2.36	https://www.genecards.org/cgi-bin/carddisp.pl?gene=WIPF1
CD24	CD24 Molecule	Protein Coding	32	GC06M106969	2.36	https://www.genecards.org/cgi-bin/carddisp.pl?gene=CD24
PRC1	Protein Regulator Of Cytokinesis 1	Protein Coding	39	GC15M090966	2.36	https://www.genecards.org/cgi-bin/carddisp.pl?gene=PRC1
ARAF	A-Raf Proto-Oncogene, Serine/Threonine Kinase	Protein Coding	46	GC0XP047562	2.36	https://www.genecards.org/cgi-bin/carddisp.pl?gene=ARAF
S100A3	S100 Calcium Binding Protein A3	Protein Coding	40	GC01M153547	2.33	https://www.genecards.org/cgi-bin/carddisp.pl?gene=S100A3
MIR582	MicroRNA 582	RNA Gene	17	GC05M059703	2.31	https://www.genecards.org/cgi-bin/carddisp.pl?gene=MIR582
RP1	RP1 Axonemal Microtubule Associated	Protein Coding	40	GC08P054555	2.31	https://www.genecards.org/cgi-bin/carddisp.pl?gene=RP1
KRT9	Keratin 9	Protein Coding	42	GC17M041565	2.3	https://www.genecards.org/cgi-bin/carddisp.pl?gene=KRT9
RHBDF1	Rhomboid 5 Homolog 1	Protein Coding	40	GC16M000058	2.3	https://www.genecards.org/cgi-bin/carddisp.pl?gene=RHBDF1
TGM2	Transglutaminase 2	Protein Coding	49	GC20M038127	2.3	https://www.genecards.org/cgi-bin/carddisp.pl?gene=TGM2
FABP2	Fatty Acid Binding Protein 2	Protein Coding	44	GC04M119317	2.28	https://www.genecards.org/cgi-bin/carddisp.pl?gene=FABP2
KCNA4	Potassium Voltage-Gated Channel Subfamily A Member 4	Protein Coding	43	GC11M030009	2.28	https://www.genecards.org/cgi-bin/carddisp.pl?gene=KCNA4
CTTNBP2NL	CTTNBP2 N-Terminal Like	Protein Coding	34	GC01P112396	2.27	https://www.genecards.org/cgi-bin/carddisp.pl?gene=CTTNBP2NL
COPS3	COP9 Signalosome Subunit 3	Protein Coding	40	GC17M017246	2.27	https://www.genecards.org/cgi-bin/carddisp.pl?gene=COPS3
KRT81	Keratin 81	Protein Coding	40	GC12M052286	2.27	https://www.genecards.org/cgi-bin/carddisp.pl?gene=KRT81
TUBE1	Tubulin Epsilon 1	Protein Coding	38	GC06M112070	2.27	https://www.genecards.org/cgi-bin/carddisp.pl?gene=TUBE1
CAST	Calpastatin	Protein Coding	46	GC05P096525	2.26	https://www.genecards.org/cgi-bin/carddisp.pl?gene=CAST
CTTNBP2	Cortactin Binding Protein 2	Protein Coding	36	GC07M117710	2.25	https://www.genecards.org/cgi-bin/carddisp.pl?gene=CTTNBP2
TWIST2	Twist Family BHLH Transcription Factor 2	Protein Coding	42	GC02P238848	2.24	https://www.genecards.org/cgi-bin/carddisp.pl?gene=TWIST2
CD86	CD86 Molecule	Protein Coding	45	GC03P122055	2.23	https://www.genecards.org/cgi-bin/carddisp.pl?gene=CD86
LOC111589215	BRCA1 Promoter Region	Biological Region	2	GC17U902746	2.23	https://www.genecards.org/cgi-bin/carddisp.pl?gene=LOC111589215
GPX3	Glutathione Peroxidase 3	Protein Coding	46	GC05P150997	2.23	https://www.genecards.org/cgi-bin/carddisp.pl?gene=GPX3
DDB1	Damage Specific DNA Binding Protein 1	Protein Coding	44	GC11M061301	2.22	https://www.genecards.org/cgi-bin/carddisp.pl?gene=DDB1
MAD1L1	Mitotic Arrest Deficient 1 Like 1	Protein Coding	47	GC07M001815	2.21	https://www.genecards.org/cgi-bin/carddisp.pl?gene=MAD1L1
ACSS2	Acyl-CoA Synthetase Short Chain Family Member 2	Protein Coding	45	GC20P034873	2.21	https://www.genecards.org/cgi-bin/carddisp.pl?gene=ACSS2
NFIA	Nuclear Factor I A	Protein Coding	46	GC01P060865	2.2	https://www.genecards.org/cgi-bin/carddisp.pl?gene=NFIA
MIR125B1	MicroRNA 125b-1	RNA Gene	20	GC11M122100	2.19	https://www.genecards.org/cgi-bin/carddisp.pl?gene=MIR125B1
EPB41L3	Erythrocyte Membrane Protein Band 4.1 Like 3	Protein Coding	42	GC18M005382	2.18	https://www.genecards.org/cgi-bin/carddisp.pl?gene=EPB41L3
CDH15	Cadherin 15	Protein Coding	45	GC16P089171	2.18	https://www.genecards.org/cgi-bin/carddisp.pl?gene=CDH15
RHOT1	Ras Homolog Family Member T1	Protein Coding	42	GC17P032142	2.17	https://www.genecards.org/cgi-bin/carddisp.pl?gene=RHOT1
RPL31	Ribosomal Protein L31	Protein Coding	42	GC02P100985	2.16	https://www.genecards.org/cgi-bin/carddisp.pl?gene=RPL31
SNRPE	Small Nuclear Ribonucleoprotein Polypeptide E	Protein Coding	42	GC01P203863	2.15	https://www.genecards.org/cgi-bin/carddisp.pl?gene=SNRPE
PBX1	PBX Homeobox 1	Protein Coding	50	GC01P164524	2.15	https://www.genecards.org/cgi-bin/carddisp.pl?gene=PBX1
MACF1	Microtubule Actin Crosslinking Factor 1	Protein Coding	42	GC01P039082	2.14	https://www.genecards.org/cgi-bin/carddisp.pl?gene=MACF1
FOXM1	Forkhead Box M1	Protein Coding	45	GC12M002857	2.13	https://www.genecards.org/cgi-bin/carddisp.pl?gene=FOXM1
MTAP	Methylthioadenosine Phosphorylase	Protein Coding	48	GC09P021792	2.13	https://www.genecards.org/cgi-bin/carddisp.pl?gene=MTAP
APCDD1L	APC Down-Regulated 1 Like	Protein Coding	33	GC20M058459	2.13	https://www.genecards.org/cgi-bin/carddisp.pl?gene=APCDD1L
KRT31	Keratin 31	Protein Coding	37	GC17M041393	2.12	https://www.genecards.org/cgi-bin/carddisp.pl?gene=KRT31
LOC111365141	NOS2 5' Regulatory Region	Biological Region	2	GC17U902748	2.12	https://www.genecards.org/cgi-bin/carddisp.pl?gene=LOC111365141
KRT13	Keratin 13	Protein Coding	44	GC17M041500	2.11	https://www.genecards.org/cgi-bin/carddisp.pl?gene=KRT13
LGALS4	Galectin 4	Protein Coding	40	GC19M039713	2.11	https://www.genecards.org/cgi-bin/carddisp.pl?gene=LGALS4
TIE1	Tyrosine Kinase With Immunoglobulin Like And EGF Like Domains 1	Protein Coding	44	GC01P043300	2.11	https://www.genecards.org/cgi-bin/carddisp.pl?gene=TIE1
FZR1	Fizzy And Cell Division Cycle 20 Related 1	Protein Coding	41	GC19P003506	2.09	https://www.genecards.org/cgi-bin/carddisp.pl?gene=FZR1
MIR372	MicroRNA 372	RNA Gene	16	GC19P054045	2.08	https://www.genecards.org/cgi-bin/carddisp.pl?gene=MIR372
HECTD1	HECT Domain E3 Ubiquitin Protein Ligase 1	Protein Coding	38	GC14M031100	2.08	https://www.genecards.org/cgi-bin/carddisp.pl?gene=HECTD1
UBE2D3	Ubiquitin Conjugating Enzyme E2 D3	Protein Coding	47	GC04M102794	2.05	https://www.genecards.org/cgi-bin/carddisp.pl?gene=UBE2D3
NEK6	NIMA Related Kinase 6	Protein Coding	41	GC09P124259	2.05	https://www.genecards.org/cgi-bin/carddisp.pl?gene=NEK6
MPC1	Mitochondrial Pyruvate Carrier 1	Protein Coding	42	GC06M166364	2.05	https://www.genecards.org/cgi-bin/carddisp.pl?gene=MPC1
HLTF	Helicase Like Transcription Factor	Protein Coding	41	GC03M149030	2.05	https://www.genecards.org/cgi-bin/carddisp.pl?gene=HLTF
OLFM4	Olfactomedin 4	Protein Coding	39	GC13P053028	2.05	https://www.genecards.org/cgi-bin/carddisp.pl?gene=OLFM4
TCF7L1	Transcription Factor 7 Like 1	Protein Coding	42	GC02P085133	2.04	https://www.genecards.org/cgi-bin/carddisp.pl?gene=TCF7L1
DVL2	Dishevelled Segment Polarity Protein 2	Protein Coding	46	GC17M007225	2.03	https://www.genecards.org/cgi-bin/carddisp.pl?gene=DVL2
MAP3K11	Mitogen-Activated Protein Kinase Kinase Kinase 11	Protein Coding	49	GC11M065598	2.03	https://www.genecards.org/cgi-bin/carddisp.pl?gene=MAP3K11
LPAR2	Lysophosphatidic Acid Receptor 2	Protein Coding	44	GC19M019624	2.03	https://www.genecards.org/cgi-bin/carddisp.pl?gene=LPAR2
RNF146	Ring Finger Protein 146	Protein Coding	36	GC06P127266	2.02	https://www.genecards.org/cgi-bin/carddisp.pl?gene=RNF146
SFRP5	Secreted Frizzled Related Protein 5	Protein Coding	41	GC10M097766	2.02	https://www.genecards.org/cgi-bin/carddisp.pl?gene=SFRP5
ACADVL	Acyl-CoA Dehydrogenase Very Long Chain	Protein Coding	47	GC17P007219	2.02	https://www.genecards.org/cgi-bin/carddisp.pl?gene=ACADVL
PER1	Period Circadian Regulator 1	Protein Coding	43	GC17M008668	2.02	https://www.genecards.org/cgi-bin/carddisp.pl?gene=PER1
PDE5A	Phosphodiesterase 5A	Protein Coding	46	GC04M119494	2.01	https://www.genecards.org/cgi-bin/carddisp.pl?gene=PDE5A
GUCA2A	Guanylate Cyclase Activator 2A	Protein Coding	38	GC01M042162	2	https://www.genecards.org/cgi-bin/carddisp.pl?gene=GUCA2A
TEAD4	TEA Domain Transcription Factor 4	Protein Coding	41	GC12P002959	1.99	https://www.genecards.org/cgi-bin/carddisp.pl?gene=TEAD4
NUP153	Nucleoporin 153	Protein Coding	41	GC06M017615	1.99	https://www.genecards.org/cgi-bin/carddisp.pl?gene=NUP153
ASAP2	ArfGAP With SH3 Domain, Ankyrin Repeat And PH Domain 2	Protein Coding	40	GC02P009206	1.98	https://www.genecards.org/cgi-bin/carddisp.pl?gene=ASAP2
CCNA1	Cyclin A1	Protein Coding	44	GC13P036431	1.98	https://www.genecards.org/cgi-bin/carddisp.pl?gene=CCNA1
EFNA2	Ephrin A2	Protein Coding	41	GC19P001331	1.96	https://www.genecards.org/cgi-bin/carddisp.pl?gene=EFNA2
DKK4	Dickkopf WNT Signaling Pathway Inhibitor 4	Protein Coding	40	GC08M042373	1.96	https://www.genecards.org/cgi-bin/carddisp.pl?gene=DKK4
SMURF1	SMAD Specific E3 Ubiquitin Protein Ligase 1	Protein Coding	47	GC07M099027	1.95	https://www.genecards.org/cgi-bin/carddisp.pl?gene=SMURF1
ISG15	ISG15 Ubiquitin Like Modifier	Protein Coding	48	GC01P001001	1.95	https://www.genecards.org/cgi-bin/carddisp.pl?gene=ISG15
KLF5	Kruppel Like Factor 5	Protein Coding	45	GC13P073054	1.95	https://www.genecards.org/cgi-bin/carddisp.pl?gene=KLF5
IL3RA	Interleukin 3 Receptor Subunit Alpha	Protein Coding	44	GC0XP001336	1.94	https://www.genecards.org/cgi-bin/carddisp.pl?gene=IL3RA
ANP32B	Acidic Nuclear Phosphoprotein 32 Family Member B	Protein Coding	36	GC09P097983	1.93	https://www.genecards.org/cgi-bin/carddisp.pl?gene=ANP32B
FAP	Fibroblast Activation Protein Alpha	Protein Coding	44	GC02M162170	1.93	https://www.genecards.org/cgi-bin/carddisp.pl?gene=FAP
RAB4B	RAB4B, Member RAS Oncogene Family	Protein Coding	38	GC19P040780	1.93	https://www.genecards.org/cgi-bin/carddisp.pl?gene=RAB4B
PPP2R1B	Protein Phosphatase 2 Scaffold Subunit Abeta	Protein Coding	49	GC11M111695	1.93	https://www.genecards.org/cgi-bin/carddisp.pl?gene=PPP2R1B
CXCL2	C-X-C Motif Chemokine Ligand 2	Protein Coding	42	GC04M074097	1.92	https://www.genecards.org/cgi-bin/carddisp.pl?gene=CXCL2
ZRANB1	Zinc Finger RANBP2-Type Containing 1	Protein Coding	37	GC10P124918	1.92	https://www.genecards.org/cgi-bin/carddisp.pl?gene=ZRANB1
DACH1	Dachshund Family Transcription Factor 1	Protein Coding	40	GC13M071437	1.91	https://www.genecards.org/cgi-bin/carddisp.pl?gene=DACH1
SOX4	SRY-Box Transcription Factor 4	Protein Coding	44	GC06P021593	1.89	https://www.genecards.org/cgi-bin/carddisp.pl?gene=SOX4
CDC20	Cell Division Cycle 20	Protein Coding	44	GC01P043358	1.89	https://www.genecards.org/cgi-bin/carddisp.pl?gene=CDC20
MIR135B	MicroRNA 135b	RNA Gene	18	GC01M205448	1.89	https://www.genecards.org/cgi-bin/carddisp.pl?gene=MIR135B
WIF1	WNT Inhibitory Factor 1	Protein Coding	46	GC12M065050	1.89	https://www.genecards.org/cgi-bin/carddisp.pl?gene=WIF1
PTGES	Prostaglandin E Synthase	Protein Coding	42	GC09M129738	1.88	https://www.genecards.org/cgi-bin/carddisp.pl?gene=PTGES
USP1	Ubiquitin Specific Peptidase 1	Protein Coding	45	GC01P062436	1.87	https://www.genecards.org/cgi-bin/carddisp.pl?gene=USP1
MAP4K5	Mitogen-Activated Protein Kinase Kinase Kinase Kinase 5	Protein Coding	45	GC14M050418	1.86	https://www.genecards.org/cgi-bin/carddisp.pl?gene=MAP4K5
PEBP1	Phosphatidylethanolamine Binding Protein 1	Protein Coding	46	GC12P118135	1.85	https://www.genecards.org/cgi-bin/carddisp.pl?gene=PEBP1
LOC111099027	Transmembrane Protease Serine 2 Breakpoint Cluster Recombination Region	Biological Region	2	GC21U900907	1.85	https://www.genecards.org/cgi-bin/carddisp.pl?gene=LOC111099027
LOC111099028	ERG, ETS Transcription Factor Breakpoint Cluster Recombination Region	Biological Region	2	GC21U900908	1.85	https://www.genecards.org/cgi-bin/carddisp.pl?gene=LOC111099028
ZBTB16	Zinc Finger And BTB Domain Containing 16	Protein Coding	48	GC11P114059	1.85	https://www.genecards.org/cgi-bin/carddisp.pl?gene=ZBTB16
RPS20	Ribosomal Protein S20	Protein Coding	44	GC08M056067	1.84	https://www.genecards.org/cgi-bin/carddisp.pl?gene=RPS20
DLGAP2	DLG Associated Protein 2	Protein Coding	38	GC08P000739	1.84	https://www.genecards.org/cgi-bin/carddisp.pl?gene=DLGAP2
DVL3	Dishevelled Segment Polarity Protein 3	Protein Coding	47	GC03P184155	1.84	https://www.genecards.org/cgi-bin/carddisp.pl?gene=DVL3
ACTR2	Actin Related Protein 2	Protein Coding	44	GC02P065227	1.83	https://www.genecards.org/cgi-bin/carddisp.pl?gene=ACTR2
FAM126A	Family With Sequence Similarity 126 Member A	Protein Coding	38	GC07M022889	1.81	https://www.genecards.org/cgi-bin/carddisp.pl?gene=FAM126A
RBBP5	RB Binding Protein 5, Histone Lysine Methyltransferase Complex Subunit	Protein Coding	40	GC01M205055	1.81	https://www.genecards.org/cgi-bin/carddisp.pl?gene=RBBP5
DBP	D-Box Binding PAR BZIP Transcription Factor	Protein Coding	39	GC19M048630	1.81	https://www.genecards.org/cgi-bin/carddisp.pl?gene=DBP
GUCA2B	Guanylate Cyclase Activator 2B	Protein Coding	39	GC01P042153	1.8	https://www.genecards.org/cgi-bin/carddisp.pl?gene=GUCA2B
RUVBL1	RuvB Like AAA ATPase 1	Protein Coding	46	GC03M128064	1.8	https://www.genecards.org/cgi-bin/carddisp.pl?gene=RUVBL1
GMNN	Geminin DNA Replication Inhibitor	Protein Coding	46	GC06P024779	1.8	https://www.genecards.org/cgi-bin/carddisp.pl?gene=GMNN
MIA	MIA SH3 Domain Containing	Protein Coding	40	GC19P040771	1.8	https://www.genecards.org/cgi-bin/carddisp.pl?gene=MIA
TBL1X	Transducin Beta Like 1 X-Linked	Protein Coding	37	GC0XP009463	1.79	https://www.genecards.org/cgi-bin/carddisp.pl?gene=TBL1X
ATP2A3	ATPase Sarcoplasmic/Endoplasmic Reticulum Ca2+ Transporting 3	Protein Coding	46	GC17M003923	1.79	https://www.genecards.org/cgi-bin/carddisp.pl?gene=ATP2A3
CEBPZ	CCAAT Enhancer Binding Protein Zeta	Protein Coding	37	GC02M037201	1.78	https://www.genecards.org/cgi-bin/carddisp.pl?gene=CEBPZ
SMARCA5	SWI/SNF Related, Matrix Associated, Actin Dependent Regulator Of Chromatin, Subfamily A, Member 5	Protein Coding	42	GC04P143513	1.78	https://www.genecards.org/cgi-bin/carddisp.pl?gene=SMARCA5
CSF2RB	Colony Stimulating Factor 2 Receptor Beta Common Subunit	Protein Coding	49	GC22P036913	1.78	https://www.genecards.org/cgi-bin/carddisp.pl?gene=CSF2RB
FBXW11	F-Box And WD Repeat Domain Containing 11	Protein Coding	43	GC05M171861	1.78	https://www.genecards.org/cgi-bin/carddisp.pl?gene=FBXW11
EXTL3	Exostosin Like Glycosyltransferase 3	Protein Coding	46	GC08P028615	1.77	https://www.genecards.org/cgi-bin/carddisp.pl?gene=EXTL3
FABP1	Fatty Acid Binding Protein 1	Protein Coding	45	GC02M088122	1.77	https://www.genecards.org/cgi-bin/carddisp.pl?gene=FABP1
UBE2C	Ubiquitin Conjugating Enzyme E2 C	Protein Coding	47	GC20P045812	1.76	https://www.genecards.org/cgi-bin/carddisp.pl?gene=UBE2C
MIRLET7B	MicroRNA Let-7b	RNA Gene	20	GC22P046121	1.76	https://www.genecards.org/cgi-bin/carddisp.pl?gene=MIRLET7B
PTGDS	Prostaglandin D2 Synthase	Protein Coding	46	GC09P136977	1.76	https://www.genecards.org/cgi-bin/carddisp.pl?gene=PTGDS
GPX2	Glutathione Peroxidase 2	Protein Coding	45	GC14M064939	1.76	https://www.genecards.org/cgi-bin/carddisp.pl?gene=GPX2
ALOX15B	Arachidonate 15-Lipoxygenase Type B	Protein Coding	42	GC17P008039	1.75	https://www.genecards.org/cgi-bin/carddisp.pl?gene=ALOX15B
BAMBI	BMP And Activin Membrane Bound Inhibitor	Protein Coding	44	GC10P028685	1.75	https://www.genecards.org/cgi-bin/carddisp.pl?gene=BAMBI
CCR6	C-C Motif Chemokine Receptor 6	Protein Coding	46	GC06P167111	1.74	https://www.genecards.org/cgi-bin/carddisp.pl?gene=CCR6
GAS2	Growth Arrest Specific 2	Protein Coding	39	GC11P022626	1.74	https://www.genecards.org/cgi-bin/carddisp.pl?gene=GAS2
CCL20	C-C Motif Chemokine Ligand 20	Protein Coding	45	GC02P227813	1.74	https://www.genecards.org/cgi-bin/carddisp.pl?gene=CCL20
THBS2	Thrombospondin 2	Protein Coding	46	GC06M169215	1.73	https://www.genecards.org/cgi-bin/carddisp.pl?gene=THBS2
FOCAD	Focadhesin	Protein Coding	34	GC09P020660	1.72	https://www.genecards.org/cgi-bin/carddisp.pl?gene=FOCAD
CAPNS1	Calpain Small Subunit 1	Protein Coding	40	GC19P037311	1.72	https://www.genecards.org/cgi-bin/carddisp.pl?gene=CAPNS1
MADCAM1	Mucosal Vascular Addressin Cell Adhesion Molecule 1	Protein Coding	40	GC19P000499	1.71	https://www.genecards.org/cgi-bin/carddisp.pl?gene=MADCAM1
ANKS1B	Ankyrin Repeat And Sterile Alpha Motif Domain Containing 1B	Protein Coding	40	GC12M098726	1.71	https://www.genecards.org/cgi-bin/carddisp.pl?gene=ANKS1B
ACTR3	Actin Related Protein 3	Protein Coding	42	GC02P113889	1.71	https://www.genecards.org/cgi-bin/carddisp.pl?gene=ACTR3
MSH5	MutS Homolog 5	Protein Coding	42	GC06P032620	1.7	https://www.genecards.org/cgi-bin/carddisp.pl?gene=MSH5
PPM1L	Protein Phosphatase, Mg2+/Mn2+ Dependent 1L	Protein Coding	38	GC03P160755	1.69	https://www.genecards.org/cgi-bin/carddisp.pl?gene=PPM1L
ZBTB17	Zinc Finger And BTB Domain Containing 17	Protein Coding	42	GC01M015943	1.69	https://www.genecards.org/cgi-bin/carddisp.pl?gene=ZBTB17
PAWR	Pro-Apoptotic WT1 Regulator	Protein Coding	41	GC12M079574	1.68	https://www.genecards.org/cgi-bin/carddisp.pl?gene=PAWR
NEIL1	Nei Like DNA Glycosylase 1	Protein Coding	39	GC15P075346	1.67	https://www.genecards.org/cgi-bin/carddisp.pl?gene=NEIL1
MIR142	MicroRNA 142	RNA Gene	19	GC17M058331	1.67	https://www.genecards.org/cgi-bin/carddisp.pl?gene=MIR142
WDR26	WD Repeat Domain 26	Protein Coding	42	GC01M224385	1.66	https://www.genecards.org/cgi-bin/carddisp.pl?gene=WDR26
PLCB4	Phospholipase C Beta 4	Protein Coding	49	GC20P009024	1.66	https://www.genecards.org/cgi-bin/carddisp.pl?gene=PLCB4
CITED1	Cbp/P300 Interacting Transactivator With Glu/Asp Rich Carboxy-Terminal Domain 1	Protein Coding	37	GC0XM072301	1.65	https://www.genecards.org/cgi-bin/carddisp.pl?gene=CITED1
CDH11	Cadherin 11	Protein Coding	47	GC16M064882	1.65	https://www.genecards.org/cgi-bin/carddisp.pl?gene=CDH11
SND1	Staphylococcal Nuclease And Tudor Domain Containing 1	Protein Coding	42	GC07P127652	1.65	https://www.genecards.org/cgi-bin/carddisp.pl?gene=SND1
PIK3R4	Phosphoinositide-3-Kinase Regulatory Subunit 4	Protein Coding	48	GC03M130678	1.64	https://www.genecards.org/cgi-bin/carddisp.pl?gene=PIK3R4
TRRAP	Transformation/Transcription Domain Associated Protein	Protein Coding	45	GC07P098877	1.63	https://www.genecards.org/cgi-bin/carddisp.pl?gene=TRRAP
ENSG00000258864		Protein Coding	8	GC05P112827	1.63	https://www.genecards.org/cgi-bin/carddisp.pl?gene=ENSG00000258864
MIR20B	MicroRNA 20b	RNA Gene	14	GC0XM134237	1.63	https://www.genecards.org/cgi-bin/carddisp.pl?gene=MIR20B
ANAPC11	Anaphase Promoting Complex Subunit 11	Protein Coding	41	GC17P081890	1.62	https://www.genecards.org/cgi-bin/carddisp.pl?gene=ANAPC11
SHOX2	Short Stature Homeobox 2	Protein Coding	38	GC03M158095	1.62	https://www.genecards.org/cgi-bin/carddisp.pl?gene=SHOX2
MIR125B2	MicroRNA 125b-2	RNA Gene	19	GC21P016590	1.62	https://www.genecards.org/cgi-bin/carddisp.pl?gene=MIR125B2
CDH4	Cadherin 4	Protein Coding	43	GC20P061252	1.61	https://www.genecards.org/cgi-bin/carddisp.pl?gene=CDH4
DCLK1	Doublecortin Like Kinase 1	Protein Coding	44	GC13M035768	1.58	https://www.genecards.org/cgi-bin/carddisp.pl?gene=DCLK1
DYNC1I2	Dynein Cytoplasmic 1 Intermediate Chain 2	Protein Coding	38	GC02P171687	1.58	https://www.genecards.org/cgi-bin/carddisp.pl?gene=DYNC1I2
ASH2L	ASH2 Like, Histone Lysine Methyltransferase Complex Subunit	Protein Coding	42	GC08P038104	1.57	https://www.genecards.org/cgi-bin/carddisp.pl?gene=ASH2L
TLE6	TLE Family Member 6, Subcortical Maternal Complex Member	Protein Coding	35	GC19P002976	1.57	https://www.genecards.org/cgi-bin/carddisp.pl?gene=TLE6
CLIP1	CAP-Gly Domain Containing Linker Protein 1	Protein Coding	44	GC12M122271	1.57	https://www.genecards.org/cgi-bin/carddisp.pl?gene=CLIP1
NEIL2	Nei Like DNA Glycosylase 2	Protein Coding	39	GC08P011769	1.56	https://www.genecards.org/cgi-bin/carddisp.pl?gene=NEIL2
C1QBP	Complement C1q Binding Protein	Protein Coding	47	GC17M005432	1.55	https://www.genecards.org/cgi-bin/carddisp.pl?gene=C1QBP
PDE2A	Phosphodiesterase 2A	Protein Coding	45	GC11M072576	1.55	https://www.genecards.org/cgi-bin/carddisp.pl?gene=PDE2A
NAV2	Neuron Navigator 2	Protein Coding	38	GC11P019345	1.53	https://www.genecards.org/cgi-bin/carddisp.pl?gene=NAV2
MAP1A	Microtubule Associated Protein 1A	Protein Coding	41	GC15P043516	1.52	https://www.genecards.org/cgi-bin/carddisp.pl?gene=MAP1A
CAMK4	Calcium/Calmodulin Dependent Protein Kinase IV	Protein Coding	47	GC05P111223	1.52	https://www.genecards.org/cgi-bin/carddisp.pl?gene=CAMK4
YBX3	Y-Box Binding Protein 3	Protein Coding	40	GC12M012796	1.51	https://www.genecards.org/cgi-bin/carddisp.pl?gene=YBX3
TNFRSF19	TNF Receptor Superfamily Member 19	Protein Coding	41	GC13P023570	1.51	https://www.genecards.org/cgi-bin/carddisp.pl?gene=TNFRSF19
ZNF148	Zinc Finger Protein 148	Protein Coding	41	GC03M125225	1.5	https://www.genecards.org/cgi-bin/carddisp.pl?gene=ZNF148
GPA33	Glycoprotein A33	Protein Coding	40	GC01M167052	1.5	https://www.genecards.org/cgi-bin/carddisp.pl?gene=GPA33
KIF17	Kinesin Family Member 17	Protein Coding	40	GC01M020663	1.5	https://www.genecards.org/cgi-bin/carddisp.pl?gene=KIF17
NIPSNAP1	Nipsnap Homolog 1	Protein Coding	41	GC22M029554	1.5	https://www.genecards.org/cgi-bin/carddisp.pl?gene=NIPSNAP1
CBY1	Chibby Family Member 1, Beta Catenin Antagonist	Protein Coding	41	GC22P038656	1.49	https://www.genecards.org/cgi-bin/carddisp.pl?gene=CBY1
HIPK2	Homeodomain Interacting Protein Kinase 2	Protein Coding	45	GC07M139561	1.49	https://www.genecards.org/cgi-bin/carddisp.pl?gene=HIPK2
PRDM5	PR/SET Domain 5	Protein Coding	40	GC04M120686	1.49	https://www.genecards.org/cgi-bin/carddisp.pl?gene=PRDM5
VGLL4	Vestigial Like Family Member 4	Protein Coding	34	GC03M011567	1.48	https://www.genecards.org/cgi-bin/carddisp.pl?gene=VGLL4
GSDMC	Gasdermin C	Protein Coding	33	GC08M129748	1.48	https://www.genecards.org/cgi-bin/carddisp.pl?gene=GSDMC
LGALS3BP	Galectin 3 Binding Protein	Protein Coding	42	GC17M078971	1.48	https://www.genecards.org/cgi-bin/carddisp.pl?gene=LGALS3BP
KAT2A	Lysine Acetyltransferase 2A	Protein Coding	48	GC17M042113	1.47	https://www.genecards.org/cgi-bin/carddisp.pl?gene=KAT2A
SET	SET Nuclear Proto-Oncogene	Protein Coding	49	GC09P128684	1.47	https://www.genecards.org/cgi-bin/carddisp.pl?gene=SET
LFNG	LFNG O-Fucosylpeptide 3-Beta-N-Acetylglucosaminyltransferase	Protein Coding	48	GC07P002512	1.47	https://www.genecards.org/cgi-bin/carddisp.pl?gene=LFNG
DACT1	Dishevelled Binding Antagonist Of Beta Catenin 1	Protein Coding	41	GC14P058633	1.47	https://www.genecards.org/cgi-bin/carddisp.pl?gene=DACT1
LETMD1	LETM1 Domain Containing 1	Protein Coding	36	GC12P051047	1.46	https://www.genecards.org/cgi-bin/carddisp.pl?gene=LETMD1
CDH9	Cadherin 9	Protein Coding	38	GC05M026916	1.46	https://www.genecards.org/cgi-bin/carddisp.pl?gene=CDH9
TRAK2	Trafficking Kinesin Protein 2	Protein Coding	39	GC02M201377	1.45	https://www.genecards.org/cgi-bin/carddisp.pl?gene=TRAK2
CA1	Carbonic Anhydrase 1	Protein Coding	48	GC08M085327	1.45	https://www.genecards.org/cgi-bin/carddisp.pl?gene=CA1
FBXO5	F-Box Protein 5	Protein Coding	37	GC06M152970	1.45	https://www.genecards.org/cgi-bin/carddisp.pl?gene=FBXO5
CHKA	Choline Kinase Alpha	Protein Coding	43	GC11M068052	1.45	https://www.genecards.org/cgi-bin/carddisp.pl?gene=CHKA
GLS	Glutaminase	Protein Coding	48	GC02P190880	1.44	https://www.genecards.org/cgi-bin/carddisp.pl?gene=GLS
AMMECR1	AMMECR Nuclear Protein 1	Protein Coding	40	GC0XM110194	1.44	https://www.genecards.org/cgi-bin/carddisp.pl?gene=AMMECR1
LNX1	Ligand Of Numb-Protein X 1	Protein Coding	42	GC04M053459	1.43	https://www.genecards.org/cgi-bin/carddisp.pl?gene=LNX1
SDC2	Syndecan 2	Protein Coding	46	GC08P096494	1.42	https://www.genecards.org/cgi-bin/carddisp.pl?gene=SDC2
OAT	Ornithine Aminotransferase	Protein Coding	48	GC10M124397	1.41	https://www.genecards.org/cgi-bin/carddisp.pl?gene=OAT
HUS1	HUS1 Checkpoint Clamp Component	Protein Coding	41	GC07M047969	1.41	https://www.genecards.org/cgi-bin/carddisp.pl?gene=HUS1
NTSR1	Neurotensin Receptor 1	Protein Coding	44	GC20P062708	1.4	https://www.genecards.org/cgi-bin/carddisp.pl?gene=NTSR1
JADE1	Jade Family PHD Finger 1	Protein Coding	34	GC04P128809	1.4	https://www.genecards.org/cgi-bin/carddisp.pl?gene=JADE1
MOAP1	Modulator Of Apoptosis 1	Protein Coding	37	GC14M093182	1.4	https://www.genecards.org/cgi-bin/carddisp.pl?gene=MOAP1
POLR2E	RNA Polymerase II Subunit E	Protein Coding	44	GC19M001086	1.39	https://www.genecards.org/cgi-bin/carddisp.pl?gene=POLR2E
HOXD3	Homeobox D3	Protein Coding	37	GC02P176136	1.39	https://www.genecards.org/cgi-bin/carddisp.pl?gene=HOXD3
DAXX	Death Domain Associated Protein	Protein Coding	45	GC06M033318	1.39	https://www.genecards.org/cgi-bin/carddisp.pl?gene=DAXX
FIBP	FGF1 Intracellular Binding Protein	Protein Coding	42	GC11M065901	1.39	https://www.genecards.org/cgi-bin/carddisp.pl?gene=FIBP
CSNK1A1L	Casein Kinase 1 Alpha 1 Like	Protein Coding	37	GC13M037103	1.38	https://www.genecards.org/cgi-bin/carddisp.pl?gene=CSNK1A1L
CLASP2	Cytoplasmic Linker Associated Protein 2	Protein Coding	40	GC03M033537	1.38	https://www.genecards.org/cgi-bin/carddisp.pl?gene=CLASP2
CDH10	Cadherin 10	Protein Coding	41	GC05M024522	1.37	https://www.genecards.org/cgi-bin/carddisp.pl?gene=CDH10
LRIG1	Leucine Rich Repeats And Immunoglobulin Like Domains 1	Protein Coding	43	GC03M066429	1.36	https://www.genecards.org/cgi-bin/carddisp.pl?gene=LRIG1
ARHGAP32	Rho GTPase Activating Protein 32	Protein Coding	40	GC11M128965	1.36	https://www.genecards.org/cgi-bin/carddisp.pl?gene=ARHGAP32
NEIL3	Nei Like DNA Glycosylase 3	Protein Coding	37	GC04P177309	1.36	https://www.genecards.org/cgi-bin/carddisp.pl?gene=NEIL3
TNIK	TRAF2 And NCK Interacting Kinase	Protein Coding	45	GC03M171061	1.34	https://www.genecards.org/cgi-bin/carddisp.pl?gene=TNIK
FRZB	Frizzled Related Protein	Protein Coding	42	GC02M182833	1.33	https://www.genecards.org/cgi-bin/carddisp.pl?gene=FRZB
CBLIF	Cobalamin Binding Intrinsic Factor	Protein Coding	36	GC11M059829	1.32	https://www.genecards.org/cgi-bin/carddisp.pl?gene=CBLIF
OCM2	Oncomodulin 2	Protein Coding	29	GC07M097984	1.31	https://www.genecards.org/cgi-bin/carddisp.pl?gene=OCM2
HOXB6	Homeobox B6	Protein Coding	37	GC17M048594	1.31	https://www.genecards.org/cgi-bin/carddisp.pl?gene=HOXB6
ATG12	Autophagy Related 12	Protein Coding	43	GC05M115828	1.31	https://www.genecards.org/cgi-bin/carddisp.pl?gene=ATG12
PEA15	Proliferation And Apoptosis Adaptor Protein 15	Protein Coding	45	GC01P160205	1.31	https://www.genecards.org/cgi-bin/carddisp.pl?gene=PEA15
NRIP1	Nuclear Receptor Interacting Protein 1	Protein Coding	45	GC21M014961	1.3	https://www.genecards.org/cgi-bin/carddisp.pl?gene=NRIP1
CKS1B	CDC28 Protein Kinase Regulatory Subunit 1B	Protein Coding	43	GC01P154974	1.28	https://www.genecards.org/cgi-bin/carddisp.pl?gene=CKS1B
TMEM9	Transmembrane Protein 9	Protein Coding	37	GC01M201134	1.28	https://www.genecards.org/cgi-bin/carddisp.pl?gene=TMEM9
TPTEP2-CSNK1E	TPTEP2-CSNK1E Readthrough	Protein Coding	16	GC22M044541	1.28	https://www.genecards.org/cgi-bin/carddisp.pl?gene=TPTEP2-CSNK1E
XRCC5	X-Ray Repair Cross Complementing 5	Protein Coding	45	GC02P216107	1.28	https://www.genecards.org/cgi-bin/carddisp.pl?gene=XRCC5
ARMCX4	Armadillo Repeat Containing X-Linked 4	Protein Coding	30	GC0XP101418	1.27	https://www.genecards.org/cgi-bin/carddisp.pl?gene=ARMCX4
HERC5	HECT And RLD Domain Containing E3 Ubiquitin Protein Ligase 5	Protein Coding	40	GC04P088457	1.26	https://www.genecards.org/cgi-bin/carddisp.pl?gene=HERC5
NIPSNAP2	Nipsnap Homolog 2	Protein Coding	30	GC07P055955	1.26	https://www.genecards.org/cgi-bin/carddisp.pl?gene=NIPSNAP2
TBL1Y	Transducin Beta Like 1 Y-Linked	Protein Coding	34	GC0YP006910	1.25	https://www.genecards.org/cgi-bin/carddisp.pl?gene=TBL1Y
WWTR1	WW Domain Containing Transcription Regulator 1	Protein Coding	43	GC03M149517	1.24	https://www.genecards.org/cgi-bin/carddisp.pl?gene=WWTR1
CDH12	Cadherin 12	Protein Coding	40	GC05M021786	1.22	https://www.genecards.org/cgi-bin/carddisp.pl?gene=CDH12
MIR1-1	MicroRNA 1-1	RNA Gene	17	GC20P062853	1.22	https://www.genecards.org/cgi-bin/carddisp.pl?gene=MIR1-1
TRIM39	Tripartite Motif Containing 39	Protein Coding	38	GC06P032572	1.22	https://www.genecards.org/cgi-bin/carddisp.pl?gene=TRIM39
NEK2	NIMA Related Kinase 2	Protein Coding	52	GC01M211658	1.22	https://www.genecards.org/cgi-bin/carddisp.pl?gene=NEK2
UBE2S	Ubiquitin Conjugating Enzyme E2 S	Protein Coding	41	GC19M055399	1.21	https://www.genecards.org/cgi-bin/carddisp.pl?gene=UBE2S
NLK	Nemo Like Kinase	Protein Coding	44	GC17P028042	1.2	https://www.genecards.org/cgi-bin/carddisp.pl?gene=NLK
LMO2	LIM Domain Only 2	Protein Coding	43	GC11M033858	1.19	https://www.genecards.org/cgi-bin/carddisp.pl?gene=LMO2
VASH2	Vasohibin 2	Protein Coding	34	GC01P212935	1.18	https://www.genecards.org/cgi-bin/carddisp.pl?gene=VASH2
MSI2	Musashi RNA Binding Protein 2	Protein Coding	43	GC17P057255	1.17	https://www.genecards.org/cgi-bin/carddisp.pl?gene=MSI2
MUC17	Mucin 17, Cell Surface Associated	Protein Coding	37	GC07P101020	1.17	https://www.genecards.org/cgi-bin/carddisp.pl?gene=MUC17
ERBIN	Erbb2 Interacting Protein	Protein Coding	35	GC05P065931	1.17	https://www.genecards.org/cgi-bin/carddisp.pl?gene=ERBIN
ANAPC2	Anaphase Promoting Complex Subunit 2	Protein Coding	40	GC09M137174	1.17	https://www.genecards.org/cgi-bin/carddisp.pl?gene=ANAPC2
DYNLL1	Dynein Light Chain LC8-Type 1	Protein Coding	44	GC12P120469	1.16	https://www.genecards.org/cgi-bin/carddisp.pl?gene=DYNLL1
PLAA	Phospholipase A2 Activating Protein	Protein Coding	44	GC09M026903	1.16	https://www.genecards.org/cgi-bin/carddisp.pl?gene=PLAA
FOXN2	Forkhead Box N2	Protein Coding	36	GC02P048314	1.15	https://www.genecards.org/cgi-bin/carddisp.pl?gene=FOXN2
RGS3	Regulator Of G Protein Signaling 3	Protein Coding	40	GC09P114457	1.13	https://www.genecards.org/cgi-bin/carddisp.pl?gene=RGS3
LZTS2	Leucine Zipper Tumor Suppressor 2	Protein Coding	37	GC10P100996	1.12	https://www.genecards.org/cgi-bin/carddisp.pl?gene=LZTS2
EIF5	Eukaryotic Translation Initiation Factor 5	Protein Coding	42	GC14P103333	1.12	https://www.genecards.org/cgi-bin/carddisp.pl?gene=EIF5
POLE2	DNA Polymerase Epsilon 2, Accessory Subunit	Protein Coding	43	GC14M049643	1.1	https://www.genecards.org/cgi-bin/carddisp.pl?gene=POLE2
CDH6	Cadherin 6	Protein Coding	42	GC05P031193	1.1	https://www.genecards.org/cgi-bin/carddisp.pl?gene=CDH6
TMED7	Transmembrane P24 Trafficking Protein 7	Protein Coding	34	GC05M115613	1.09	https://www.genecards.org/cgi-bin/carddisp.pl?gene=TMED7
LAMTOR2	Late Endosomal/Lysosomal Adaptor, MAPK And MTOR Activator 2	Protein Coding	41	GC01P156054	1.09	https://www.genecards.org/cgi-bin/carddisp.pl?gene=LAMTOR2
LECT2	Leukocyte Cell Derived Chemotaxin 2	Protein Coding	38	GC05M135922	1.08	https://www.genecards.org/cgi-bin/carddisp.pl?gene=LECT2
CETN3	Centrin 3	Protein Coding	38	GC05M090392	1.08	https://www.genecards.org/cgi-bin/carddisp.pl?gene=CETN3
RABEP2	Rabaptin, RAB GTPase Binding Effector Protein 2	Protein Coding	35	GC16M028915	1.07	https://www.genecards.org/cgi-bin/carddisp.pl?gene=RABEP2
DVL1P1	Dishevelled Segment Polarity Protein 1 Pseudogene 1	Pseudogene	13	GC22M019241	1.07	https://www.genecards.org/cgi-bin/carddisp.pl?gene=DVL1P1
SIAH2	Siah E3 Ubiquitin Protein Ligase 2	Protein Coding	44	GC03M150741	1.07	https://www.genecards.org/cgi-bin/carddisp.pl?gene=SIAH2
INSIG2	Insulin Induced Gene 2	Protein Coding	41	GC02P118088	1.05	https://www.genecards.org/cgi-bin/carddisp.pl?gene=INSIG2
ESPL1	Extra Spindle Pole Bodies Like 1, Separase	Protein Coding	44	GC12P053268	1.05	https://www.genecards.org/cgi-bin/carddisp.pl?gene=ESPL1
INCENP	Inner Centromere Protein	Protein Coding	41	GC11P062142	1.04	https://www.genecards.org/cgi-bin/carddisp.pl?gene=INCENP
WLS	Wnt Ligand Secretion Mediator	Protein Coding	40	GC01M068098	1.04	https://www.genecards.org/cgi-bin/carddisp.pl?gene=WLS
FEM1B	Fem-1 Homolog B	Protein Coding	38	GC15P069668	1.03	https://www.genecards.org/cgi-bin/carddisp.pl?gene=FEM1B
ENC1	Ectodermal-Neural Cortex 1	Protein Coding	37	GC05M074627	1.03	https://www.genecards.org/cgi-bin/carddisp.pl?gene=ENC1
ADGRA3	Adhesion G Protein-Coupled Receptor A3	Protein Coding	36	GC04M022345	1.02	https://www.genecards.org/cgi-bin/carddisp.pl?gene=ADGRA3
USP30	Ubiquitin Specific Peptidase 30	Protein Coding	40	GC12P109027	1.02	https://www.genecards.org/cgi-bin/carddisp.pl?gene=USP30
MEMO1	Mediator Of Cell Motility 1	Protein Coding	38	GC02M031865	1.01	https://www.genecards.org/cgi-bin/carddisp.pl?gene=MEMO1
ELOF1	Elongation Factor 1 Homolog	Protein Coding	34	GC19M011551	1.01	https://www.genecards.org/cgi-bin/carddisp.pl?gene=ELOF1
PAICS	Phosphoribosylaminoimidazole Carboxylase And Phosphoribosylaminoimidazolesuccinocarboxamide Synthase	Protein Coding	42	GC04P056435	0.99	https://www.genecards.org/cgi-bin/carddisp.pl?gene=PAICS
ZFP91	ZFP91 Zinc Finger Protein	Protein Coding	34	GC11P058580	0.99	https://www.genecards.org/cgi-bin/carddisp.pl?gene=ZFP91
ADAM23	ADAM Metallopeptidase Domain 23	Protein Coding	41	GC02P206443	0.99	https://www.genecards.org/cgi-bin/carddisp.pl?gene=ADAM23
MIR193A	MicroRNA 193a	RNA Gene	17	GC17P031559	0.98	https://www.genecards.org/cgi-bin/carddisp.pl?gene=MIR193A
SAT1	Spermidine/Spermine N1-Acetyltransferase 1	Protein Coding	46	GC0XP023784	0.95	https://www.genecards.org/cgi-bin/carddisp.pl?gene=SAT1
JRK	Jrk Helix-Turn-Helix Protein	Protein Coding	38	GC08M142657	0.95	https://www.genecards.org/cgi-bin/carddisp.pl?gene=JRK
RANBP3	RAN Binding Protein 3	Protein Coding	39	GC19M005916	0.94	https://www.genecards.org/cgi-bin/carddisp.pl?gene=RANBP3
IGHA1	Immunoglobulin Heavy Constant Alpha 1	Protein Coding	29	GC14M105782	0.92	https://www.genecards.org/cgi-bin/carddisp.pl?gene=IGHA1
CKS2	CDC28 Protein Kinase Regulatory Subunit 2	Protein Coding	42	GC09P089311	0.91	https://www.genecards.org/cgi-bin/carddisp.pl?gene=CKS2
TFAP4	Transcription Factor AP-4	Protein Coding	39	GC16M004247	0.9	https://www.genecards.org/cgi-bin/carddisp.pl?gene=TFAP4
DPEP1	Dipeptidase 1	Protein Coding	42	GC16P089613	0.9	https://www.genecards.org/cgi-bin/carddisp.pl?gene=DPEP1
TICAM2	Toll Like Receptor Adaptor Molecule 2	Protein Coding	40	GC05M115579	0.89	https://www.genecards.org/cgi-bin/carddisp.pl?gene=TICAM2
MIR552	MicroRNA 552	RNA Gene	13	GC01M034669	0.89	https://www.genecards.org/cgi-bin/carddisp.pl?gene=MIR552
ZBTB33	Zinc Finger And BTB Domain Containing 33	Protein Coding	38	GC0XP120250	0.89	https://www.genecards.org/cgi-bin/carddisp.pl?gene=ZBTB33
PSMD5	Proteasome 26S Subunit, Non-ATPase 5	Protein Coding	38	GC09M120815	0.89	https://www.genecards.org/cgi-bin/carddisp.pl?gene=PSMD5
CDH18	Cadherin 18	Protein Coding	37	GC05M019508	0.88	https://www.genecards.org/cgi-bin/carddisp.pl?gene=CDH18
PSRC1	Proline And Serine Rich Coiled-Coil 1	Protein Coding	38	GC01M109279	0.86	https://www.genecards.org/cgi-bin/carddisp.pl?gene=PSRC1
ADGRA2	Adhesion G Protein-Coupled Receptor A2	Protein Coding	36	GC08P037785	0.86	https://www.genecards.org/cgi-bin/carddisp.pl?gene=ADGRA2
CDH7	Cadherin 7	Protein Coding	38	GC18P065750	0.86	https://www.genecards.org/cgi-bin/carddisp.pl?gene=CDH7
NPEPPS	Aminopeptidase Puromycin Sensitive	Protein Coding	42	GC17P047522	0.85	https://www.genecards.org/cgi-bin/carddisp.pl?gene=NPEPPS
RGS9	Regulator Of G Protein Signaling 9	Protein Coding	45	GC17P065137	0.84	https://www.genecards.org/cgi-bin/carddisp.pl?gene=RGS9
MAGI3	Membrane Associated Guanylate Kinase, WW And PDZ Domain Containing 3	Protein Coding	38	GC01P113390	0.84	https://www.genecards.org/cgi-bin/carddisp.pl?gene=MAGI3
MAPRE1P1	MAPRE1 Pseudogene 1	Pseudogene	8	GC08M135623	0.83	https://www.genecards.org/cgi-bin/carddisp.pl?gene=MAPRE1P1
MOS	MOS Proto-Oncogene, Serine/Threonine Kinase	Protein Coding	40	GC08M056112	0.83	https://www.genecards.org/cgi-bin/carddisp.pl?gene=MOS
SOX7	SRY-Box Transcription Factor 7	Protein Coding	36	GC08M010723	0.82	https://www.genecards.org/cgi-bin/carddisp.pl?gene=SOX7
EP400	E1A Binding Protein P400	Protein Coding	38	GC12P131949	0.82	https://www.genecards.org/cgi-bin/carddisp.pl?gene=EP400
RNF114	Ring Finger Protein 114	Protein Coding	40	GC20P049936	0.81	https://www.genecards.org/cgi-bin/carddisp.pl?gene=RNF114
DCP2	Decapping MRNA 2	Protein Coding	38	GC05P112976	0.8	https://www.genecards.org/cgi-bin/carddisp.pl?gene=DCP2
LIMS1	LIM Zinc Finger Domain Containing 1	Protein Coding	41	GC02P108609	0.78	https://www.genecards.org/cgi-bin/carddisp.pl?gene=LIMS1
PPP1R9B	Protein Phosphatase 1 Regulatory Subunit 9B	Protein Coding	41	GC17M050133	0.73	https://www.genecards.org/cgi-bin/carddisp.pl?gene=PPP1R9B
LINC01133	Long Intergenic Non-Protein Coding RNA 1133	RNA Gene	15	GC01P159933	0.71	https://www.genecards.org/cgi-bin/carddisp.pl?gene=LINC01133
ANAPC4	Anaphase Promoting Complex Subunit 4	Protein Coding	36	GC04P025379	0.69	https://www.genecards.org/cgi-bin/carddisp.pl?gene=ANAPC4
RAD9A	RAD9 Checkpoint Clamp Component A	Protein Coding	41	GC11P067318	0.69	https://www.genecards.org/cgi-bin/carddisp.pl?gene=RAD9A
CDC23	Cell Division Cycle 23	Protein Coding	40	GC05M138198	0.69	https://www.genecards.org/cgi-bin/carddisp.pl?gene=CDC23
LRG1	Leucine Rich Alpha-2-Glycoprotein 1	Protein Coding	40	GC19M004538	0.69	https://www.genecards.org/cgi-bin/carddisp.pl?gene=LRG1
ANAPC5	Anaphase Promoting Complex Subunit 5	Protein Coding	38	GC12M121308	0.68	https://www.genecards.org/cgi-bin/carddisp.pl?gene=ANAPC5
DLGAP5	DLG Associated Protein 5	Protein Coding	39	GC14M055148	0.67	https://www.genecards.org/cgi-bin/carddisp.pl?gene=DLGAP5
FRAT2	FRAT Regulator Of WNT Signaling Pathway 2	Protein Coding	37	GC10M097332	0.65	https://www.genecards.org/cgi-bin/carddisp.pl?gene=FRAT2
STK19	Serine/Threonine Kinase 19	Protein Coding	38	GC06P031971	0.65	https://www.genecards.org/cgi-bin/carddisp.pl?gene=STK19
RAD1	RAD1 Checkpoint DNA Exonuclease	Protein Coding	40	GC05M034905	0.64	https://www.genecards.org/cgi-bin/carddisp.pl?gene=RAD1
PALD1	Phosphatase Domain Containing Paladin 1	Protein Coding	33	GC10P070478	0.61	https://www.genecards.org/cgi-bin/carddisp.pl?gene=PALD1
PRR15	Proline Rich 15	Protein Coding	34	GC07P029563	0.61	https://www.genecards.org/cgi-bin/carddisp.pl?gene=PRR15
FAF1	Fas Associated Factor 1	Protein Coding	45	GC01M050439	0.54	https://www.genecards.org/cgi-bin/carddisp.pl?gene=FAF1
TMEM132A	Transmembrane Protein 132A	Protein Coding	34	GC11P060924	0.53	https://www.genecards.org/cgi-bin/carddisp.pl?gene=TMEM132A
B3GNT6	UDP-GlcNAc:BetaGal Beta-1,3-N-Acetylglucosaminyltransferase 6	Protein Coding	37	GC11P077034	0.52	https://www.genecards.org/cgi-bin/carddisp.pl?gene=B3GNT6
KRT24	Keratin 24	Protein Coding	37	GC17M040697	0.51	https://www.genecards.org/cgi-bin/carddisp.pl?gene=KRT24
CDH24	Cadherin 24	Protein Coding	34	GC14M023047	0.51	https://www.genecards.org/cgi-bin/carddisp.pl?gene=CDH24
FGFBP1	Fibroblast Growth Factor Binding Protein 1	Protein Coding	40	GC04M015937	0.47	https://www.genecards.org/cgi-bin/carddisp.pl?gene=FGFBP1
LOC110599580	CYP1B1 Promoter	Biological Region	2	GC02U904495	0.46	https://www.genecards.org/cgi-bin/carddisp.pl?gene=LOC110599580
NKD1	NKD Inhibitor Of WNT Signaling Pathway 1	Protein Coding	38	GC16P050548	0.45	https://www.genecards.org/cgi-bin/carddisp.pl?gene=NKD1
ZRSR2P1	ZRSR2 Pseudogene 1	Pseudogene	18	GC05P112892	0.42	https://www.genecards.org/cgi-bin/carddisp.pl?gene=ZRSR2P1
BCL9L	BCL9 Like	Protein Coding	37	GC11M118893	0.4	https://www.genecards.org/cgi-bin/carddisp.pl?gene=BCL9L
ICE2	Interactor Of Little Elongation Complex ELL Subunit 2	Protein Coding	33	GC15M060419	0.39	https://www.genecards.org/cgi-bin/carddisp.pl?gene=ICE2
MIR3648-1	MicroRNA 3648-1	RNA Gene	10	GC21P008219	0.38	https://www.genecards.org/cgi-bin/carddisp.pl?gene=MIR3648-1
EPB41L4A-AS1	EPB41L4A Antisense RNA 1	RNA Gene	16	GC05P112160	0.37	https://www.genecards.org/cgi-bin/carddisp.pl?gene=EPB41L4A-AS1
CDC40	Cell Division Cycle 40	Protein Coding	38	GC06P110180	0.36	https://www.genecards.org/cgi-bin/carddisp.pl?gene=CDC40
MIR939	MicroRNA 939	RNA Gene	16	GC08M144394	0.26	https://www.genecards.org/cgi-bin/carddisp.pl?gene=MIR939
MIR4326	MicroRNA 4326	RNA Gene	12	GC20P063286	0.26	https://www.genecards.org/cgi-bin/carddisp.pl?gene=MIR4326

## Sheet: HNPCC
Gene Symbol	Description	Category	Gifts	GC Id	Relevance score	GeneCards Link
MSH6	MutS Homolog 6	Protein Coding	50	GC02P047695	312.98	https://www.genecards.org/cgi-bin/carddisp.pl?gene=MSH6
MSH2	MutS Homolog 2	Protein Coding	49	GC02P047402	289.89	https://www.genecards.org/cgi-bin/carddisp.pl?gene=MSH2
MLH1	MutL Homolog 1	Protein Coding	49	GC03P036993	286.44	https://www.genecards.org/cgi-bin/carddisp.pl?gene=MLH1
PMS2	PMS1 Homolog 2, Mismatch Repair System Component	Protein Coding	49	GC07M005973	241.92	https://www.genecards.org/cgi-bin/carddisp.pl?gene=PMS2
BRCA2	BRCA2 DNA Repair Associated	Protein Coding	50	GC13P032315	208.94	https://www.genecards.org/cgi-bin/carddisp.pl?gene=BRCA2
APC	APC Regulator Of WNT Signaling Pathway	Protein Coding	49	GC05P112707	158.85	https://www.genecards.org/cgi-bin/carddisp.pl?gene=APC
TP53	Tumor Protein P53	Protein Coding	55	GC17M007661	156.28	https://www.genecards.org/cgi-bin/carddisp.pl?gene=TP53
BRCA1	BRCA1 DNA Repair Associated	Protein Coding	52	GC17M043044	151.59	https://www.genecards.org/cgi-bin/carddisp.pl?gene=BRCA1
CDH1	Cadherin 1	Protein Coding	52	GC16P068737	130.35	https://www.genecards.org/cgi-bin/carddisp.pl?gene=CDH1
ATM	ATM Serine/Threonine Kinase	Protein Coding	54	GC11P108222	96.39	https://www.genecards.org/cgi-bin/carddisp.pl?gene=ATM
CTNNB1	Catenin Beta 1	Protein Coding	54	GC03P041236	94.98	https://www.genecards.org/cgi-bin/carddisp.pl?gene=CTNNB1
MUTYH	MutY DNA Glycosylase	Protein Coding	45	GC01M045329	94.37	https://www.genecards.org/cgi-bin/carddisp.pl?gene=MUTYH
CHEK2	Checkpoint Kinase 2	Protein Coding	54	GC22M028687	93.68	https://www.genecards.org/cgi-bin/carddisp.pl?gene=CHEK2
EPCAM	Epithelial Cell Adhesion Molecule	Protein Coding	48	GC02P047345	92.97	https://www.genecards.org/cgi-bin/carddisp.pl?gene=EPCAM
PTEN	Phosphatase And Tensin Homolog	Protein Coding	54	GC10P087863	92.77	https://www.genecards.org/cgi-bin/carddisp.pl?gene=PTEN
CDKN2A	Cyclin Dependent Kinase Inhibitor 2A	Protein Coding	52	GC09M021967	91.35	https://www.genecards.org/cgi-bin/carddisp.pl?gene=CDKN2A
PIK3CA	Phosphatidylinositol-4,5-Bisphosphate 3-Kinase Catalytic Subunit Alpha	Protein Coding	53	GC03P179148	90.84	https://www.genecards.org/cgi-bin/carddisp.pl?gene=PIK3CA
POLE	DNA Polymerase Epsilon, Catalytic Subunit	Protein Coding	50	GC12M132624	89.15	https://www.genecards.org/cgi-bin/carddisp.pl?gene=POLE
FBXO11	F-Box Protein 11	Protein Coding	42	GC02M047789	88	https://www.genecards.org/cgi-bin/carddisp.pl?gene=FBXO11
EGFR	Epidermal Growth Factor Receptor	Protein Coding	56	GC07P055019	87.82	https://www.genecards.org/cgi-bin/carddisp.pl?gene=EGFR
KRAS	KRAS Proto-Oncogene, GTPase	Protein Coding	52	GC12M025204	86.19	https://www.genecards.org/cgi-bin/carddisp.pl?gene=KRAS
BRIP1	BRCA1 Interacting Protein C-Terminal Helicase 1	Protein Coding	50	GC17M061679	85.51	https://www.genecards.org/cgi-bin/carddisp.pl?gene=BRIP1
TGFBR2	Transforming Growth Factor Beta Receptor 2	Protein Coding	53	GC03P030623	83.14	https://www.genecards.org/cgi-bin/carddisp.pl?gene=TGFBR2
BRAF	B-Raf Proto-Oncogene, Serine/Threonine Kinase	Protein Coding	55	GC07M140719	80.26	https://www.genecards.org/cgi-bin/carddisp.pl?gene=BRAF
SMAD4	SMAD Family Member 4	Protein Coding	52	GC18P051028	80.1	https://www.genecards.org/cgi-bin/carddisp.pl?gene=SMAD4
POLD1	DNA Polymerase Delta 1, Catalytic Subunit	Protein Coding	47	GC19P050385	79.73	https://www.genecards.org/cgi-bin/carddisp.pl?gene=POLD1
CCND1	Cyclin D1	Protein Coding	53	GC11P069641	78.73	https://www.genecards.org/cgi-bin/carddisp.pl?gene=CCND1
AXIN2	Axin 2	Protein Coding	49	GC17M065528	71.13	https://www.genecards.org/cgi-bin/carddisp.pl?gene=AXIN2
NF1	Neurofibromin 1	Protein Coding	49	GC17P031007	70.03	https://www.genecards.org/cgi-bin/carddisp.pl?gene=NF1
MLH3	MutL Homolog 3	Protein Coding	42	GC14M075013	69.34	https://www.genecards.org/cgi-bin/carddisp.pl?gene=MLH3
PMS1	PMS1 Homolog 1, Mismatch Repair System Component	Protein Coding	41	GC02P189784	68.19	https://www.genecards.org/cgi-bin/carddisp.pl?gene=PMS1
RAD51D	RAD51 Paralog D	Protein Coding	42	GC17M035092	67.33	https://www.genecards.org/cgi-bin/carddisp.pl?gene=RAD51D
STK11	Serine/Threonine Kinase 11	Protein Coding	50	GC19P001177	66.63	https://www.genecards.org/cgi-bin/carddisp.pl?gene=STK11
AKT1	AKT Serine/Threonine Kinase 1	Protein Coding	56	GC14M104769	64.35	https://www.genecards.org/cgi-bin/carddisp.pl?gene=AKT1
RET	Ret Proto-Oncogene	Protein Coding	54	GC10P043081	62.32	https://www.genecards.org/cgi-bin/carddisp.pl?gene=RET
MET	MET Proto-Oncogene, Receptor Tyrosine Kinase	Protein Coding	56	GC07P116672	62.29	https://www.genecards.org/cgi-bin/carddisp.pl?gene=MET
MDM2	MDM2 Proto-Oncogene	Protein Coding	54	GC12P068808	61.8	https://www.genecards.org/cgi-bin/carddisp.pl?gene=MDM2
ERBB2	Erb-B2 Receptor Tyrosine Kinase 2	Protein Coding	56	GC17P039687	61.12	https://www.genecards.org/cgi-bin/carddisp.pl?gene=ERBB2
VEGFA	Vascular Endothelial Growth Factor A	Protein Coding	50	GC06P043770	58.93	https://www.genecards.org/cgi-bin/carddisp.pl?gene=VEGFA
CDK4	Cyclin Dependent Kinase 4	Protein Coding	56	GC12M057743	57.98	https://www.genecards.org/cgi-bin/carddisp.pl?gene=CDK4
CDKN1A	Cyclin Dependent Kinase Inhibitor 1A	Protein Coding	51	GC06P043367	57.58	https://www.genecards.org/cgi-bin/carddisp.pl?gene=CDKN1A
RB1	RB Transcriptional Corepressor 1	Protein Coding	50	GC13P048303	56.73	https://www.genecards.org/cgi-bin/carddisp.pl?gene=RB1
MYC	MYC Proto-Oncogene, BHLH Transcription Factor	Protein Coding	53	GC08P127735	56.49	https://www.genecards.org/cgi-bin/carddisp.pl?gene=MYC
HRAS	HRas Proto-Oncogene, GTPase	Protein Coding	53	GC11M000522	56.17	https://www.genecards.org/cgi-bin/carddisp.pl?gene=HRAS
BAX	BCL2 Associated X, Apoptosis Regulator	Protein Coding	49	GC19P048954	56.09	https://www.genecards.org/cgi-bin/carddisp.pl?gene=BAX
TNF	Tumor Necrosis Factor	Protein Coding	53	GC06P032604	54.93	https://www.genecards.org/cgi-bin/carddisp.pl?gene=TNF
CDKN1B	Cyclin Dependent Kinase Inhibitor 1B	Protein Coding	50	GC12P012716	54.56	https://www.genecards.org/cgi-bin/carddisp.pl?gene=CDKN1B
TGFB1	Transforming Growth Factor Beta 1	Protein Coding	53	GC19M041301	54.26	https://www.genecards.org/cgi-bin/carddisp.pl?gene=TGFB1
TERT	Telomerase Reverse Transcriptase	Protein Coding	52	GC05M001253	53.26	https://www.genecards.org/cgi-bin/carddisp.pl?gene=TERT
EPM2AIP1	EPM2A Interacting Protein 1	Protein Coding	36	GC03M036986	51.33	https://www.genecards.org/cgi-bin/carddisp.pl?gene=EPM2AIP1
MGMT	O-6-Methylguanine-DNA Methyltransferase	Protein Coding	50	GC10P129467	51.06	https://www.genecards.org/cgi-bin/carddisp.pl?gene=MGMT
FLCN	Folliculin	Protein Coding	42	GC17M017212	50.9	https://www.genecards.org/cgi-bin/carddisp.pl?gene=FLCN
EGF	Epidermal Growth Factor	Protein Coding	52	GC04P109912	50.41	https://www.genecards.org/cgi-bin/carddisp.pl?gene=EGF
DNMT1	DNA Methyltransferase 1	Protein Coding	52	GC19M010133	49.46	https://www.genecards.org/cgi-bin/carddisp.pl?gene=DNMT1
MMP2	Matrix Metallopeptidase 2	Protein Coding	54	GC16P055390	49.44	https://www.genecards.org/cgi-bin/carddisp.pl?gene=MMP2
TYMS	Thymidylate Synthetase	Protein Coding	50	GC18P000657	48.96	https://www.genecards.org/cgi-bin/carddisp.pl?gene=TYMS
STAT3	Signal Transducer And Activator Of Transcription 3	Protein Coding	54	GC17M042313	48.41	https://www.genecards.org/cgi-bin/carddisp.pl?gene=STAT3
ABCB1	ATP Binding Cassette Subfamily B Member 1	Protein Coding	52	GC07M087504	48.16	https://www.genecards.org/cgi-bin/carddisp.pl?gene=ABCB1
IL6	Interleukin 6	Protein Coding	50	GC07P022765	47.97	https://www.genecards.org/cgi-bin/carddisp.pl?gene=IL6
NBN	Nibrin	Protein Coding	49	GC08M089933	47.67	https://www.genecards.org/cgi-bin/carddisp.pl?gene=NBN
MSH3	MutS Homolog 3	Protein Coding	44	GC05P080654	46.45	https://www.genecards.org/cgi-bin/carddisp.pl?gene=MSH3
MIR21	MicroRNA 21	RNA Gene	22	GC17P059841	46.33	https://www.genecards.org/cgi-bin/carddisp.pl?gene=MIR21
SRC	SRC Proto-Oncogene, Non-Receptor Tyrosine Kinase	Protein Coding	53	GC20P037344	45.84	https://www.genecards.org/cgi-bin/carddisp.pl?gene=SRC
BMPR1A	Bone Morphogenetic Protein Receptor Type 1A	Protein Coding	52	GC10P086756	45.83	https://www.genecards.org/cgi-bin/carddisp.pl?gene=BMPR1A
CASP8	Caspase 8	Protein Coding	53	GC02P201233	45.43	https://www.genecards.org/cgi-bin/carddisp.pl?gene=CASP8
OGG1	8-Oxoguanine DNA Glycosylase	Protein Coding	48	GC03P009751	45.22	https://www.genecards.org/cgi-bin/carddisp.pl?gene=OGG1
H19	H19 Imprinted Maternally Expressed Transcript	RNA Gene	28	GC11M001995	44.6	https://www.genecards.org/cgi-bin/carddisp.pl?gene=H19
RNF43	Ring Finger Protein 43	Protein Coding	40	GC17M058352	44.46	https://www.genecards.org/cgi-bin/carddisp.pl?gene=RNF43
KDR	Kinase Insert Domain Receptor	Protein Coding	54	GC04M055078	44.31	https://www.genecards.org/cgi-bin/carddisp.pl?gene=KDR
PTGS2	Prostaglandin-Endoperoxide Synthase 2	Protein Coding	50	GC01M186640	44.3	https://www.genecards.org/cgi-bin/carddisp.pl?gene=PTGS2
MTHFR	Methylenetetrahydrofolate Reductase	Protein Coding	49	GC01M011785	44.02	https://www.genecards.org/cgi-bin/carddisp.pl?gene=MTHFR
AIMP2	Aminoacyl TRNA Synthetase Complex Interacting Multifunctional Protein 2	Protein Coding	42	GC07P006016	43.95	https://www.genecards.org/cgi-bin/carddisp.pl?gene=AIMP2
CTNNA1	Catenin Alpha 1	Protein Coding	49	GC05P138613	43.85	https://www.genecards.org/cgi-bin/carddisp.pl?gene=CTNNA1
MTOR	Mechanistic Target Of Rapamycin Kinase	Protein Coding	54	GC01M011106	43.61	https://www.genecards.org/cgi-bin/carddisp.pl?gene=MTOR
ESR2	Estrogen Receptor 2	Protein Coding	50	GC14M064084	43.43	https://www.genecards.org/cgi-bin/carddisp.pl?gene=ESR2
IGF2	Insulin Like Growth Factor 2	Protein Coding	49	GC11M002130	43.4	https://www.genecards.org/cgi-bin/carddisp.pl?gene=IGF2
GNAS	GNAS Complex Locus	Protein Coding	51	GC20P058839	42.48	https://www.genecards.org/cgi-bin/carddisp.pl?gene=GNAS
PLAU	Plasminogen Activator, Urokinase	Protein Coding	53	GC10P073909	42.2	https://www.genecards.org/cgi-bin/carddisp.pl?gene=PLAU
FLT4	Fms Related Tyrosine Kinase 4	Protein Coding	54	GC05M180607	42.15	https://www.genecards.org/cgi-bin/carddisp.pl?gene=FLT4
FAS	Fas Cell Surface Death Receptor	Protein Coding	51	GC10P088969	41.92	https://www.genecards.org/cgi-bin/carddisp.pl?gene=FAS
MCC	MCC Regulator Of WNT Signaling Pathway	Protein Coding	41	GC05M113022	41.7	https://www.genecards.org/cgi-bin/carddisp.pl?gene=MCC
FHIT	Fragile Histidine Triad Diadenosine Triphosphatase	Protein Coding	46	GC03M059747	40.94	https://www.genecards.org/cgi-bin/carddisp.pl?gene=FHIT
FGFR3	Fibroblast Growth Factor Receptor 3	Protein Coding	56	GC04P001795	40.04	https://www.genecards.org/cgi-bin/carddisp.pl?gene=FGFR3
VEGFC	Vascular Endothelial Growth Factor C	Protein Coding	48	GC04M176683	40.03	https://www.genecards.org/cgi-bin/carddisp.pl?gene=VEGFC
IL1B	Interleukin 1 Beta	Protein Coding	49	GC02M112829	39.77	https://www.genecards.org/cgi-bin/carddisp.pl?gene=IL1B
EP300	E1A Binding Protein P300	Protein Coding	52	GC22P041091	39.71	https://www.genecards.org/cgi-bin/carddisp.pl?gene=EP300
AURKA	Aurora Kinase A	Protein Coding	51	GC20M056370	39.63	https://www.genecards.org/cgi-bin/carddisp.pl?gene=AURKA
TNFRSF10B	TNF Receptor Superfamily Member 10b	Protein Coding	52	GC08M023006	39.29	https://www.genecards.org/cgi-bin/carddisp.pl?gene=TNFRSF10B
ESR1	Estrogen Receptor 1	Protein Coding	54	GC06P151656	39.02	https://www.genecards.org/cgi-bin/carddisp.pl?gene=ESR1
RAD50	RAD50 Double Strand Break Repair Protein	Protein Coding	50	GC05P132556	38.89	https://www.genecards.org/cgi-bin/carddisp.pl?gene=RAD50
MIR145	MicroRNA 145	RNA Gene	21	GC05P149430	38.76	https://www.genecards.org/cgi-bin/carddisp.pl?gene=MIR145
NRAS	NRAS Proto-Oncogene, GTPase	Protein Coding	52	GC01M114704	38.71	https://www.genecards.org/cgi-bin/carddisp.pl?gene=NRAS
MRE11	MRE11 Homolog, Double Strand Break Repair Nuclease	Protein Coding	43	GC11M094416	38.55	https://www.genecards.org/cgi-bin/carddisp.pl?gene=MRE11
MIR143	MicroRNA 143	RNA Gene	22	GC05P149410	38.52	https://www.genecards.org/cgi-bin/carddisp.pl?gene=MIR143
MIR221	MicroRNA 221	RNA Gene	20	GC0XM045746	38.33	https://www.genecards.org/cgi-bin/carddisp.pl?gene=MIR221
MIR126	MicroRNA 126	RNA Gene	21	GC09P136670	38.05	https://www.genecards.org/cgi-bin/carddisp.pl?gene=MIR126
MIR34A	MicroRNA 34a	RNA Gene	21	GC01M009151	38	https://www.genecards.org/cgi-bin/carddisp.pl?gene=MIR34A
MIR155	MicroRNA 155	RNA Gene	17	GC21P025573	37.87	https://www.genecards.org/cgi-bin/carddisp.pl?gene=MIR155
BUB1B	BUB1 Mitotic Checkpoint Serine/Threonine Kinase B	Protein Coding	50	GC15P040161	37.84	https://www.genecards.org/cgi-bin/carddisp.pl?gene=BUB1B
ENG	Endoglin	Protein Coding	48	GC09M127815	37.56	https://www.genecards.org/cgi-bin/carddisp.pl?gene=ENG
NME1	NME/NM23 Nucleoside Diphosphate Kinase 1	Protein Coding	50	GC17P051154	37.54	https://www.genecards.org/cgi-bin/carddisp.pl?gene=NME1
CHEK1	Checkpoint Kinase 1	Protein Coding	51	GC11P125625	37.49	https://www.genecards.org/cgi-bin/carddisp.pl?gene=CHEK1
SMAD7	SMAD Family Member 7	Protein Coding	44	GC18M048919	37.42	https://www.genecards.org/cgi-bin/carddisp.pl?gene=SMAD7
IFNG	Interferon Gamma	Protein Coding	49	GC12M068064	37.3	https://www.genecards.org/cgi-bin/carddisp.pl?gene=IFNG
TGFBR1	Transforming Growth Factor Beta Receptor 1	Protein Coding	54	GC09P099104	37.22	https://www.genecards.org/cgi-bin/carddisp.pl?gene=TGFBR1
FN1	Fibronectin 1	Protein Coding	51	GC02M215360	37.22	https://www.genecards.org/cgi-bin/carddisp.pl?gene=FN1
TYMP	Thymidine Phosphorylase	Protein Coding	48	GC22M050525	37.16	https://www.genecards.org/cgi-bin/carddisp.pl?gene=TYMP
MMP1	Matrix Metallopeptidase 1	Protein Coding	53	GC11M102810	36.72	https://www.genecards.org/cgi-bin/carddisp.pl?gene=MMP1
NOTCH1	Notch Receptor 1	Protein Coding	53	GC09M136562	36.69	https://www.genecards.org/cgi-bin/carddisp.pl?gene=NOTCH1
GSTP1	Glutathione S-Transferase Pi 1	Protein Coding	50	GC11P067583	36.53	https://www.genecards.org/cgi-bin/carddisp.pl?gene=GSTP1
RAF1	Raf-1 Proto-Oncogene, Serine/Threonine Kinase	Protein Coding	56	GC03M012583	36.3	https://www.genecards.org/cgi-bin/carddisp.pl?gene=RAF1
PPARG	Peroxisome Proliferator Activated Receptor Gamma	Protein Coding	54	GC03P012287	36.14	https://www.genecards.org/cgi-bin/carddisp.pl?gene=PPARG
MIR125A	MicroRNA 125a	RNA Gene	20	GC19P051726	36.12	https://www.genecards.org/cgi-bin/carddisp.pl?gene=MIR125A
BCL2	BCL2 Apoptosis Regulator	Protein Coding	53	GC18M063123	35.98	https://www.genecards.org/cgi-bin/carddisp.pl?gene=BCL2
CXCR4	C-X-C Motif Chemokine Receptor 4	Protein Coding	53	GC02M136114	35.87	https://www.genecards.org/cgi-bin/carddisp.pl?gene=CXCR4
VDR	Vitamin D Receptor	Protein Coding	53	GC12M047841	35.72	https://www.genecards.org/cgi-bin/carddisp.pl?gene=VDR
MAP2K1	Mitogen-Activated Protein Kinase Kinase 1	Protein Coding	55	GC15P066386	35.72	https://www.genecards.org/cgi-bin/carddisp.pl?gene=MAP2K1
TCF7L2	Transcription Factor 7 Like 2	Protein Coding	48	GC10P112950	35.2	https://www.genecards.org/cgi-bin/carddisp.pl?gene=TCF7L2
MIR223	MicroRNA 223	RNA Gene	20	GC0XP066018	35.19	https://www.genecards.org/cgi-bin/carddisp.pl?gene=MIR223
MUC1	Mucin 1, Cell Surface Associated	Protein Coding	49	GC01M155185	35.08	https://www.genecards.org/cgi-bin/carddisp.pl?gene=MUC1
MIR141	MicroRNA 141	RNA Gene	21	GC12P007692	35.04	https://www.genecards.org/cgi-bin/carddisp.pl?gene=MIR141
CASP3	Caspase 3	Protein Coding	52	GC04M184627	35	https://www.genecards.org/cgi-bin/carddisp.pl?gene=CASP3
CAV1	Caveolin 1	Protein Coding	49	GC07P116524	34.82	https://www.genecards.org/cgi-bin/carddisp.pl?gene=CAV1
MIR203A	MicroRNA 203a	RNA Gene	19	GC14P104199	34.79	https://www.genecards.org/cgi-bin/carddisp.pl?gene=MIR203A
SLC2A1	Solute Carrier Family 2 Member 1	Protein Coding	53	GC01M042925	34.77	https://www.genecards.org/cgi-bin/carddisp.pl?gene=SLC2A1
GSTM1	Glutathione S-Transferase Mu 1	Protein Coding	42	GC01P109687	34.73	https://www.genecards.org/cgi-bin/carddisp.pl?gene=GSTM1
MIR195	MicroRNA 195	RNA Gene	18	GC17M007018	34.64	https://www.genecards.org/cgi-bin/carddisp.pl?gene=MIR195
ODC1	Ornithine Decarboxylase 1	Protein Coding	48	GC02M010432	34.55	https://www.genecards.org/cgi-bin/carddisp.pl?gene=ODC1
KIT	KIT Proto-Oncogene, Receptor Tyrosine Kinase	Protein Coding	54	GC04P054657	34.4	https://www.genecards.org/cgi-bin/carddisp.pl?gene=KIT
MIR17	MicroRNA 17	RNA Gene	20	GC13P091350	34.34	https://www.genecards.org/cgi-bin/carddisp.pl?gene=MIR17
FASLG	Fas Ligand	Protein Coding	49	GC01P172628	34.33	https://www.genecards.org/cgi-bin/carddisp.pl?gene=FASLG
DPYD	Dihydropyrimidine Dehydrogenase	Protein Coding	53	GC01M097015	34.3	https://www.genecards.org/cgi-bin/carddisp.pl?gene=DPYD
MMP9	Matrix Metallopeptidase 9	Protein Coding	54	GC20P046008	34.19	https://www.genecards.org/cgi-bin/carddisp.pl?gene=MMP9
MIR96	MicroRNA 96	RNA Gene	19	GC07M129774	33.88	https://www.genecards.org/cgi-bin/carddisp.pl?gene=MIR96
MIR20A	MicroRNA 20a	RNA Gene	17	GC13P091416	33.84	https://www.genecards.org/cgi-bin/carddisp.pl?gene=MIR20A
MIR10B	MicroRNA 10b	RNA Gene	20	GC02P176150	33.68	https://www.genecards.org/cgi-bin/carddisp.pl?gene=MIR10B
MIR31	MicroRNA 31	RNA Gene	18	GC09M021507	33.65	https://www.genecards.org/cgi-bin/carddisp.pl?gene=MIR31
XIAP	X-Linked Inhibitor Of Apoptosis	Protein Coding	50	GC0XP123859	33.65	https://www.genecards.org/cgi-bin/carddisp.pl?gene=XIAP
SMAD3	SMAD Family Member 3	Protein Coding	49	GC15P067063	33.45	https://www.genecards.org/cgi-bin/carddisp.pl?gene=SMAD3
MIR200C	MicroRNA 200c	RNA Gene	20	GC12P007691	33.33	https://www.genecards.org/cgi-bin/carddisp.pl?gene=MIR200C
MIR191	MicroRNA 191	RNA Gene	19	GC03M049162	33	https://www.genecards.org/cgi-bin/carddisp.pl?gene=MIR191
KCNQ1OT1	KCNQ1 Opposite Strand/Antisense Transcript 1	RNA Gene	25	GC11M002661	32.99	https://www.genecards.org/cgi-bin/carddisp.pl?gene=KCNQ1OT1
TIMP3	TIMP Metallopeptidase Inhibitor 3	Protein Coding	46	GC22P032800	32.89	https://www.genecards.org/cgi-bin/carddisp.pl?gene=TIMP3
RAD51L3-RFFL	RAD51L3-RFFL Readthrough	RNA Gene	9	GC17M035009	32.76	https://www.genecards.org/cgi-bin/carddisp.pl?gene=RAD51L3-RFFL
FLT1	Fms Related Tyrosine Kinase 1	Protein Coding	52	GC13M028300	32.73	https://www.genecards.org/cgi-bin/carddisp.pl?gene=FLT1
PIK3R1	Phosphoinositide-3-Kinase Regulatory Subunit 1	Protein Coding	52	GC05P068215	32.66	https://www.genecards.org/cgi-bin/carddisp.pl?gene=PIK3R1
KRT8	Keratin 8	Protein Coding	48	GC12M052897	32.5	https://www.genecards.org/cgi-bin/carddisp.pl?gene=KRT8
GALNT12	Polypeptide N-Acetylgalactosaminyltransferase 12	Protein Coding	43	GC09P098807	32.48	https://www.genecards.org/cgi-bin/carddisp.pl?gene=GALNT12
FH	Fumarate Hydratase	Protein Coding	47	GC01M241499	32.46	https://www.genecards.org/cgi-bin/carddisp.pl?gene=FH
TGFB2	Transforming Growth Factor Beta 2	Protein Coding	51	GC01P218345	32.42	https://www.genecards.org/cgi-bin/carddisp.pl?gene=TGFB2
CXCL12	C-X-C Motif Chemokine Ligand 12	Protein Coding	46	GC10M044370	32.07	https://www.genecards.org/cgi-bin/carddisp.pl?gene=CXCL12
MIR182	MicroRNA 182	RNA Gene	18	GC07M129770	31.67	https://www.genecards.org/cgi-bin/carddisp.pl?gene=MIR182
ERCC1	ERCC Excision Repair 1, Endonuclease Non-Catalytic Subunit	Protein Coding	47	GC19M045409	31.62	https://www.genecards.org/cgi-bin/carddisp.pl?gene=ERCC1
MIR27A	MicroRNA 27a	RNA Gene	21	GC19M013965	31.42	https://www.genecards.org/cgi-bin/carddisp.pl?gene=MIR27A
NFE2L2	Nuclear Factor, Erythroid 2 Like 2	Protein Coding	49	GC02M177227	31.25	https://www.genecards.org/cgi-bin/carddisp.pl?gene=NFE2L2
NOS2	Nitric Oxide Synthase 2	Protein Coding	50	GC17M027756	31.24	https://www.genecards.org/cgi-bin/carddisp.pl?gene=NOS2
MIR127	MicroRNA 127	RNA Gene	20	GC14P103870	31.12	https://www.genecards.org/cgi-bin/carddisp.pl?gene=MIR127
MIR106A	MicroRNA 106a	RNA Gene	17	GC0XM134240	30.97	https://www.genecards.org/cgi-bin/carddisp.pl?gene=MIR106A
FGFR2	Fibroblast Growth Factor Receptor 2	Protein Coding	55	GC10M121478	30.97	https://www.genecards.org/cgi-bin/carddisp.pl?gene=FGFR2
MIR100	MicroRNA 100	RNA Gene	19	GC11M122152	30.85	https://www.genecards.org/cgi-bin/carddisp.pl?gene=MIR100
ICAM1	Intercellular Adhesion Molecule 1	Protein Coding	52	GC19P010270	30.56	https://www.genecards.org/cgi-bin/carddisp.pl?gene=ICAM1
MIR128-2	MicroRNA 128-2	RNA Gene	19	GC03P035752	30.45	https://www.genecards.org/cgi-bin/carddisp.pl?gene=MIR128-2
MT-CO1	Mitochondrially Encoded Cytochrome C Oxidase I	Protein Coding	34	GCMTP005906	30.44	https://www.genecards.org/cgi-bin/carddisp.pl?gene=MT-CO1
HIF1A	Hypoxia Inducible Factor 1 Subunit Alpha	Protein Coding	49	GC14P061695	30.43	https://www.genecards.org/cgi-bin/carddisp.pl?gene=HIF1A
CD44	CD44 Molecule (Indian Blood Group)	Protein Coding	49	GC11P035139	30.35	https://www.genecards.org/cgi-bin/carddisp.pl?gene=CD44
MIR34B	MicroRNA 34b	RNA Gene	20	GC11P111570	30.28	https://www.genecards.org/cgi-bin/carddisp.pl?gene=MIR34B
MIR25	MicroRNA 25	RNA Gene	19	GC07M100093	30.22	https://www.genecards.org/cgi-bin/carddisp.pl?gene=MIR25
UGT1A1	UDP Glucuronosyltransferase Family 1 Member A1	Protein Coding	49	GC02P233760	30.12	https://www.genecards.org/cgi-bin/carddisp.pl?gene=UGT1A1
MIR222	MicroRNA 222	RNA Gene	20	GC0XM045747	29.95	https://www.genecards.org/cgi-bin/carddisp.pl?gene=MIR222
LIG4	DNA Ligase 4	Protein Coding	49	GC13M108207	29.92	https://www.genecards.org/cgi-bin/carddisp.pl?gene=LIG4
MIR106B	MicroRNA 106b	RNA Gene	21	GC07M100210	29.71	https://www.genecards.org/cgi-bin/carddisp.pl?gene=MIR106B
TNFSF10	TNF Superfamily Member 10	Protein Coding	48	GC03M172505	29.65	https://www.genecards.org/cgi-bin/carddisp.pl?gene=TNFSF10
MIR451A	MicroRNA 451a	RNA Gene	16	GC17M028861	29.6	https://www.genecards.org/cgi-bin/carddisp.pl?gene=MIR451A
HFE	Homeostatic Iron Regulator	Protein Coding	45	GC06P026087	29.58	https://www.genecards.org/cgi-bin/carddisp.pl?gene=HFE
MIR34C	MicroRNA 34c	RNA Gene	20	GC11P111571	29.57	https://www.genecards.org/cgi-bin/carddisp.pl?gene=MIR34C
TLR4	Toll Like Receptor 4	Protein Coding	52	GC09P117704	29.55	https://www.genecards.org/cgi-bin/carddisp.pl?gene=TLR4
IGF1	Insulin Like Growth Factor 1	Protein Coding	50	GC12M102395	29.53	https://www.genecards.org/cgi-bin/carddisp.pl?gene=IGF1
MIR29B2	MicroRNA 29b-2	RNA Gene	17	GC01M207808	29.43	https://www.genecards.org/cgi-bin/carddisp.pl?gene=MIR29B2
MIR29A	MicroRNA 29a	RNA Gene	21	GC07M130876	29.22	https://www.genecards.org/cgi-bin/carddisp.pl?gene=MIR29A
ACTG2	Actin Gamma 2, Smooth Muscle	Protein Coding	47	GC02P073892	29.13	https://www.genecards.org/cgi-bin/carddisp.pl?gene=ACTG2
IGF2R	Insulin Like Growth Factor 2 Receptor	Protein Coding	47	GC06P159969	28.88	https://www.genecards.org/cgi-bin/carddisp.pl?gene=IGF2R
EPHB2	EPH Receptor B2	Protein Coding	52	GC01P022710	28.87	https://www.genecards.org/cgi-bin/carddisp.pl?gene=EPHB2
MIR107	MicroRNA 107	RNA Gene	18	GC10M089602	28.8	https://www.genecards.org/cgi-bin/carddisp.pl?gene=MIR107
STAT1	Signal Transducer And Activator Of Transcription 1	Protein Coding	54	GC02M190964	28.56	https://www.genecards.org/cgi-bin/carddisp.pl?gene=STAT1
MIR214	MicroRNA 214	RNA Gene	19	GC01M172219	28.53	https://www.genecards.org/cgi-bin/carddisp.pl?gene=MIR214
PROM1	Prominin 1	Protein Coding	46	GC04M015965	28.43	https://www.genecards.org/cgi-bin/carddisp.pl?gene=PROM1
IL1RN	Interleukin 1 Receptor Antagonist	Protein Coding	49	GC02P114265	28.41	https://www.genecards.org/cgi-bin/carddisp.pl?gene=IL1RN
CDKN2B	Cyclin Dependent Kinase Inhibitor 2B	Protein Coding	48	GC09M022002	28.39	https://www.genecards.org/cgi-bin/carddisp.pl?gene=CDKN2B
MIR183	MicroRNA 183	RNA Gene	17	GC07M129787	28.38	https://www.genecards.org/cgi-bin/carddisp.pl?gene=MIR183
SIL1	SIL1 Nucleotide Exchange Factor	Protein Coding	42	GC05M138957	28.13	https://www.genecards.org/cgi-bin/carddisp.pl?gene=SIL1
MIR204	MicroRNA 204	RNA Gene	21	GC09M070809	28.08	https://www.genecards.org/cgi-bin/carddisp.pl?gene=MIR204
MIRLET7B	MicroRNA Let-7b	RNA Gene	20	GC22P046121	27.97	https://www.genecards.org/cgi-bin/carddisp.pl?gene=MIRLET7B
MIR181A2	MicroRNA 181a-2	RNA Gene	18	GC09P124692	27.92	https://www.genecards.org/cgi-bin/carddisp.pl?gene=MIR181A2
CASR	Calcium Sensing Receptor	Protein Coding	52	GC03P122183	27.9	https://www.genecards.org/cgi-bin/carddisp.pl?gene=CASR
MIR15B	MicroRNA 15b	RNA Gene	17	GC03P160404	27.77	https://www.genecards.org/cgi-bin/carddisp.pl?gene=MIR15B
MIRLET7G	MicroRNA Let-7g	RNA Gene	19	GC03M052268	27.71	https://www.genecards.org/cgi-bin/carddisp.pl?gene=MIRLET7G
MIR320A	MicroRNA 320a	RNA Gene	19	GC08M022245	27.66	https://www.genecards.org/cgi-bin/carddisp.pl?gene=MIR320A
TOP2A	DNA Topoisomerase II Alpha	Protein Coding	52	GC17M040388	27.57	https://www.genecards.org/cgi-bin/carddisp.pl?gene=TOP2A
FAN1	FANCD2 And FANCI Associated Nuclease 1	Protein Coding	38	GC15P031044	27.56	https://www.genecards.org/cgi-bin/carddisp.pl?gene=FAN1
HNF4A	Hepatocyte Nuclear Factor 4 Alpha	Protein Coding	52	GC20P044355	27.54	https://www.genecards.org/cgi-bin/carddisp.pl?gene=HNF4A
MIR224	MicroRNA 224	RNA Gene	16	GC0XM151958	27.52	https://www.genecards.org/cgi-bin/carddisp.pl?gene=MIR224
BIRC5	Baculoviral IAP Repeat Containing 5	Protein Coding	48	GC17P078214	27.42	https://www.genecards.org/cgi-bin/carddisp.pl?gene=BIRC5
NFKB1	Nuclear Factor Kappa B Subunit 1	Protein Coding	54	GC04P102501	27.33	https://www.genecards.org/cgi-bin/carddisp.pl?gene=NFKB1
JUN	Jun Proto-Oncogene, AP-1 Transcription Factor Subunit	Protein Coding	50	GC01M058780	27.16	https://www.genecards.org/cgi-bin/carddisp.pl?gene=JUN
MIR18A	MicroRNA 18a	RNA Gene	17	GC13P091408	27.13	https://www.genecards.org/cgi-bin/carddisp.pl?gene=MIR18A
ZEB1	Zinc Finger E-Box Binding Homeobox 1	Protein Coding	49	GC10P031318	27.12	https://www.genecards.org/cgi-bin/carddisp.pl?gene=ZEB1
MIR23A	MicroRNA 23a	RNA Gene	20	GC19M013966	26.96	https://www.genecards.org/cgi-bin/carddisp.pl?gene=MIR23A
MIR24-2	MicroRNA 24-2	RNA Gene	17	GC19M013963	26.95	https://www.genecards.org/cgi-bin/carddisp.pl?gene=MIR24-2
WRN	WRN RecQ Like Helicase	Protein Coding	48	GC08P031033	26.84	https://www.genecards.org/cgi-bin/carddisp.pl?gene=WRN
PPP2R1B	Protein Phosphatase 2 Scaffold Subunit Abeta	Protein Coding	49	GC11M111695	26.78	https://www.genecards.org/cgi-bin/carddisp.pl?gene=PPP2R1B
WNT5A	Wnt Family Member 5A	Protein Coding	50	GC03M055465	26.55	https://www.genecards.org/cgi-bin/carddisp.pl?gene=WNT5A
UMPS	Uridine Monophosphate Synthetase	Protein Coding	46	GC03P124730	26.38	https://www.genecards.org/cgi-bin/carddisp.pl?gene=UMPS
AXIN1	Axin 1	Protein Coding	48	GC16M000287	26.29	https://www.genecards.org/cgi-bin/carddisp.pl?gene=AXIN1
MIR192	MicroRNA 192	RNA Gene	20	GC11M064891	26.23	https://www.genecards.org/cgi-bin/carddisp.pl?gene=MIR192
MIR93	MicroRNA 93	RNA Gene	20	GC07M100192	26.16	https://www.genecards.org/cgi-bin/carddisp.pl?gene=MIR93
MIR32	MicroRNA 32	RNA Gene	18	GC09M109046	26.15	https://www.genecards.org/cgi-bin/carddisp.pl?gene=MIR32
CXCL8	C-X-C Motif Chemokine Ligand 8	Protein Coding	43	GC04P073740	26.11	https://www.genecards.org/cgi-bin/carddisp.pl?gene=CXCL8
AFP	Alpha Fetoprotein	Protein Coding	47	GC04P073431	26.04	https://www.genecards.org/cgi-bin/carddisp.pl?gene=AFP
MIR140	MicroRNA 140	RNA Gene	20	GC16P069934	26.01	https://www.genecards.org/cgi-bin/carddisp.pl?gene=MIR140
CYP1A1	Cytochrome P450 Family 1 Subfamily A Member 1	Protein Coding	48	GC15M074719	25.9	https://www.genecards.org/cgi-bin/carddisp.pl?gene=CYP1A1
WNT1	Wnt Family Member 1	Protein Coding	48	GC12P049032	25.87	https://www.genecards.org/cgi-bin/carddisp.pl?gene=WNT1
MIR10A	MicroRNA 10a	RNA Gene	20	GC17M048579	25.73	https://www.genecards.org/cgi-bin/carddisp.pl?gene=MIR10A
CDKN2B-AS1	CDKN2B Antisense RNA 1	RNA Gene	20	GC09P021994	25.68	https://www.genecards.org/cgi-bin/carddisp.pl?gene=CDKN2B-AS1
MUC2	Mucin 2, Oligomeric Mucus/Gel-Forming	Protein Coding	41	GC11P001074	25.55	https://www.genecards.org/cgi-bin/carddisp.pl?gene=MUC2
CD274	CD274 Molecule	Protein Coding	46	GC09P005450	25.48	https://www.genecards.org/cgi-bin/carddisp.pl?gene=CD274
TGFA	Transforming Growth Factor Alpha	Protein Coding	48	GC02M070447	25.3	https://www.genecards.org/cgi-bin/carddisp.pl?gene=TGFA
DCC	DCC Netrin 1 Receptor	Protein Coding	47	GC18P052340	25.28	https://www.genecards.org/cgi-bin/carddisp.pl?gene=DCC
CEACAM5	CEA Cell Adhesion Molecule 5	Protein Coding	43	GC19P041709	25.13	https://www.genecards.org/cgi-bin/carddisp.pl?gene=CEACAM5
TCF4	Transcription Factor 4	Protein Coding	48	GC18M055222	25.09	https://www.genecards.org/cgi-bin/carddisp.pl?gene=TCF4
VHL	Von Hippel-Lindau Tumor Suppressor	Protein Coding	47	GC03P010192	25.01	https://www.genecards.org/cgi-bin/carddisp.pl?gene=VHL
MIR296	MicroRNA 296	RNA Gene	16	GC20M058817	24.77	https://www.genecards.org/cgi-bin/carddisp.pl?gene=MIR296
DLC1	DLC1 Rho GTPase Activating Protein	Protein Coding	46	GC08M013083	24.74	https://www.genecards.org/cgi-bin/carddisp.pl?gene=DLC1
PCNA	Proliferating Cell Nuclear Antigen	Protein Coding	52	GC20M005114	24.47	https://www.genecards.org/cgi-bin/carddisp.pl?gene=PCNA
EIF2B2	Eukaryotic Translation Initiation Factor 2B Subunit Beta	Protein Coding	45	GC14P075002	24.43	https://www.genecards.org/cgi-bin/carddisp.pl?gene=EIF2B2
PLA2G2A	Phospholipase A2 Group IIA	Protein Coding	47	GC01M019975	24.4	https://www.genecards.org/cgi-bin/carddisp.pl?gene=PLA2G2A
CDK2	Cyclin Dependent Kinase 2	Protein Coding	54	GC12P055966	24.31	https://www.genecards.org/cgi-bin/carddisp.pl?gene=CDK2
MAPK1	Mitogen-Activated Protein Kinase 1	Protein Coding	52	GC22M021754	24.3	https://www.genecards.org/cgi-bin/carddisp.pl?gene=MAPK1
CDX2	Caudal Type Homeobox 2	Protein Coding	44	GC13M027962	24.21	https://www.genecards.org/cgi-bin/carddisp.pl?gene=CDX2
KLF6	Kruppel Like Factor 6	Protein Coding	45	GC10M003779	24.1	https://www.genecards.org/cgi-bin/carddisp.pl?gene=KLF6
BCL2L1	BCL2 Like 1	Protein Coding	49	GC20M031664	24.07	https://www.genecards.org/cgi-bin/carddisp.pl?gene=BCL2L1
HPGD	15-Hydroxyprostaglandin Dehydrogenase	Protein Coding	49	GC04M174490	24.06	https://www.genecards.org/cgi-bin/carddisp.pl?gene=HPGD
MAPK8	Mitogen-Activated Protein Kinase 8	Protein Coding	51	GC10P048306	24	https://www.genecards.org/cgi-bin/carddisp.pl?gene=MAPK8
PARP1	Poly(ADP-Ribose) Polymerase 1	Protein Coding	50	GC01M226360	23.96	https://www.genecards.org/cgi-bin/carddisp.pl?gene=PARP1
TLR2	Toll Like Receptor 2	Protein Coding	52	GC04P153684	23.79	https://www.genecards.org/cgi-bin/carddisp.pl?gene=TLR2
MIAT	Myocardial Infarction Associated Transcript	RNA Gene	23	GC22P026646	23.7	https://www.genecards.org/cgi-bin/carddisp.pl?gene=MIAT
RASSF1	Ras Association Domain Family Member 1	Protein Coding	45	GC03M050329	23.69	https://www.genecards.org/cgi-bin/carddisp.pl?gene=RASSF1
MIR19A	MicroRNA 19a	RNA Gene	18	GC13P091415	23.68	https://www.genecards.org/cgi-bin/carddisp.pl?gene=MIR19A
CYCS	Cytochrome C, Somatic	Protein Coding	50	GC07M025118	23.6	https://www.genecards.org/cgi-bin/carddisp.pl?gene=CYCS
MIR328	MicroRNA 328	RNA Gene	18	GC16M067203	23.54	https://www.genecards.org/cgi-bin/carddisp.pl?gene=MIR328
CASP9	Caspase 9	Protein Coding	49	GC01M015491	23.49	https://www.genecards.org/cgi-bin/carddisp.pl?gene=CASP9
KRT20	Keratin 20	Protein Coding	42	GC17M040875	23.44	https://www.genecards.org/cgi-bin/carddisp.pl?gene=KRT20
BUB1	BUB1 Mitotic Checkpoint Serine/Threonine Kinase	Protein Coding	50	GC02M110637	23.33	https://www.genecards.org/cgi-bin/carddisp.pl?gene=BUB1
MIR215	MicroRNA 215	RNA Gene	18	GC01M220117	23.31	https://www.genecards.org/cgi-bin/carddisp.pl?gene=MIR215
HMGA2	High Mobility Group AT-Hook 2	Protein Coding	46	GC12P065824	23.13	https://www.genecards.org/cgi-bin/carddisp.pl?gene=HMGA2
KRT7	Keratin 7	Protein Coding	43	GC12P052232	23.12	https://www.genecards.org/cgi-bin/carddisp.pl?gene=KRT7
MIR137	MicroRNA 137	RNA Gene	17	GC01M098046	23.1	https://www.genecards.org/cgi-bin/carddisp.pl?gene=MIR137
HOTAIR	HOX Transcript Antisense RNA	RNA Gene	25	GC12M053962	22.86	https://www.genecards.org/cgi-bin/carddisp.pl?gene=HOTAIR
IL2	Interleukin 2	Protein Coding	46	GC04M122451	22.81	https://www.genecards.org/cgi-bin/carddisp.pl?gene=IL2
NAT2	N-Acetyltransferase 2	Protein Coding	44	GC08P018391	22.79	https://www.genecards.org/cgi-bin/carddisp.pl?gene=NAT2
IGF1R	Insulin Like Growth Factor 1 Receptor	Protein Coding	56	GC15P098648	22.75	https://www.genecards.org/cgi-bin/carddisp.pl?gene=IGF1R
EXO1	Exonuclease 1	Protein Coding	44	GC01P241847	22.72	https://www.genecards.org/cgi-bin/carddisp.pl?gene=EXO1
MMP7	Matrix Metallopeptidase 7	Protein Coding	49	GC11M102425	22.61	https://www.genecards.org/cgi-bin/carddisp.pl?gene=MMP7
ABCG2	ATP Binding Cassette Subfamily G Member 2 (Junior Blood Group)	Protein Coding	52	GC04M088090	22.58	https://www.genecards.org/cgi-bin/carddisp.pl?gene=ABCG2
PDGFRL	Platelet Derived Growth Factor Receptor Like	Protein Coding	43	GC08P017576	22.57	https://www.genecards.org/cgi-bin/carddisp.pl?gene=PDGFRL
CCNB1	Cyclin B1	Protein Coding	49	GC05P069167	22.52	https://www.genecards.org/cgi-bin/carddisp.pl?gene=CCNB1
SMAD2	SMAD Family Member 2	Protein Coding	48	GC18M047809	22.47	https://www.genecards.org/cgi-bin/carddisp.pl?gene=SMAD2
CCAT1	Colon Cancer Associated Transcript 1	RNA Gene	15	GC08M127207	22.44	https://www.genecards.org/cgi-bin/carddisp.pl?gene=CCAT1
HGF	Hepatocyte Growth Factor	Protein Coding	53	GC07M081699	22.39	https://www.genecards.org/cgi-bin/carddisp.pl?gene=HGF
NQO1	NAD(P)H Quinone Dehydrogenase 1	Protein Coding	50	GC16M069706	22.36	https://www.genecards.org/cgi-bin/carddisp.pl?gene=NQO1
MIR26A1	MicroRNA 26a-1	RNA Gene	20	GC03P037969	22.34	https://www.genecards.org/cgi-bin/carddisp.pl?gene=MIR26A1
MIR133B	MicroRNA 133b	RNA Gene	20	GC06P052148	22.1	https://www.genecards.org/cgi-bin/carddisp.pl?gene=MIR133B
GREM1	Gremlin 1, DAN Family BMP Antagonist	Protein Coding	45	GC15P032717	22.07	https://www.genecards.org/cgi-bin/carddisp.pl?gene=GREM1
CDK1	Cyclin Dependent Kinase 1	Protein Coding	47	GC10P060772	22.07	https://www.genecards.org/cgi-bin/carddisp.pl?gene=CDK1
XRCC1	X-Ray Repair Cross Complementing 1	Protein Coding	45	GC19M043543	22.01	https://www.genecards.org/cgi-bin/carddisp.pl?gene=XRCC1
MAPK3	Mitogen-Activated Protein Kinase 3	Protein Coding	50	GC16M030117	21.79	https://www.genecards.org/cgi-bin/carddisp.pl?gene=MAPK3
CTSD	Cathepsin D	Protein Coding	53	GC11M001752	21.71	https://www.genecards.org/cgi-bin/carddisp.pl?gene=CTSD
MALAT1	Metastasis Associated Lung Adenocarcinoma Transcript 1	RNA Gene	22	GC11P065562	21.69	https://www.genecards.org/cgi-bin/carddisp.pl?gene=MALAT1
THBS1	Thrombospondin 1	Protein Coding	46	GC15P039581	21.61	https://www.genecards.org/cgi-bin/carddisp.pl?gene=THBS1
TOP1	DNA Topoisomerase I	Protein Coding	48	GC20P041028	21.56	https://www.genecards.org/cgi-bin/carddisp.pl?gene=TOP1
IGFBP3	Insulin Like Growth Factor Binding Protein 3	Protein Coding	46	GC07M045912	21.55	https://www.genecards.org/cgi-bin/carddisp.pl?gene=IGFBP3
RHO	Rhodopsin	Protein Coding	49	GC03P130153	21.55	https://www.genecards.org/cgi-bin/carddisp.pl?gene=RHO
RAD54B	RAD54 Homolog B	Protein Coding	44	GC08M094371	21.51	https://www.genecards.org/cgi-bin/carddisp.pl?gene=RAD54B
CFLAR	CASP8 And FADD Like Apoptosis Regulator	Protein Coding	48	GC02P201117	21.38	https://www.genecards.org/cgi-bin/carddisp.pl?gene=CFLAR
MUC5AC	Mucin 5AC, Oligomeric Mucus/Gel-Forming	Protein Coding	41	GC11P001151	21.36	https://www.genecards.org/cgi-bin/carddisp.pl?gene=MUC5AC
ANXA5	Annexin A5	Protein Coding	47	GC04M121667	21.3	https://www.genecards.org/cgi-bin/carddisp.pl?gene=ANXA5
CCNA2	Cyclin A2	Protein Coding	46	GC04M121816	21.29	https://www.genecards.org/cgi-bin/carddisp.pl?gene=CCNA2
PLAUR	Plasminogen Activator, Urokinase Receptor	Protein Coding	46	GC19M043646	21.18	https://www.genecards.org/cgi-bin/carddisp.pl?gene=PLAUR
EZH2	Enhancer Of Zeste 2 Polycomb Repressive Complex 2 Subunit	Protein Coding	54	GC07M148807	21.09	https://www.genecards.org/cgi-bin/carddisp.pl?gene=EZH2
CCAT2	Colon Cancer Associated Transcript 2	RNA Gene	14	GC08P127400	21.04	https://www.genecards.org/cgi-bin/carddisp.pl?gene=CCAT2
ABCC1	ATP Binding Cassette Subfamily C Member 1	Protein Coding	49	GC16P015949	21.01	https://www.genecards.org/cgi-bin/carddisp.pl?gene=ABCC1
PTPRJ	Protein Tyrosine Phosphatase Receptor Type J	Protein Coding	48	GC11P048002	20.78	https://www.genecards.org/cgi-bin/carddisp.pl?gene=PTPRJ
CDKN3	Cyclin Dependent Kinase Inhibitor 3	Protein Coding	42	GC14P054398	20.65	https://www.genecards.org/cgi-bin/carddisp.pl?gene=CDKN3
MIR150	MicroRNA 150	RNA Gene	20	GC19M049500	20.64	https://www.genecards.org/cgi-bin/carddisp.pl?gene=MIR150
BMP6	Bone Morphogenetic Protein 6	Protein Coding	45	GC06P007726	20.63	https://www.genecards.org/cgi-bin/carddisp.pl?gene=BMP6
DNMT3B	DNA Methyltransferase 3 Beta	Protein Coding	50	GC20P032762	20.61	https://www.genecards.org/cgi-bin/carddisp.pl?gene=DNMT3B
XRCC2	X-Ray Repair Cross Complementing 2	Protein Coding	44	GC07M152644	20.6	https://www.genecards.org/cgi-bin/carddisp.pl?gene=XRCC2
MIR342	MicroRNA 342	RNA Gene	18	GC14P100109	20.54	https://www.genecards.org/cgi-bin/carddisp.pl?gene=MIR342
BCL10	BCL10 Immune Signaling Adaptor	Protein Coding	46	GC01M085265	20.5	https://www.genecards.org/cgi-bin/carddisp.pl?gene=BCL10
PVT1	Pvt1 Oncogene	RNA Gene	25	GC08P127806	20.44	https://www.genecards.org/cgi-bin/carddisp.pl?gene=PVT1
B2M	Beta-2-Microglobulin	Protein Coding	50	GC15P044711	20.26	https://www.genecards.org/cgi-bin/carddisp.pl?gene=B2M
MIR132	MicroRNA 132	RNA Gene	20	GC17M002049	20.24	https://www.genecards.org/cgi-bin/carddisp.pl?gene=MIR132
PTK2	Protein Tyrosine Kinase 2	Protein Coding	49	GC08M140657	20.24	https://www.genecards.org/cgi-bin/carddisp.pl?gene=PTK2
UCA1	Urothelial Cancer Associated 1	RNA Gene	22	GC19P015828	20.22	https://www.genecards.org/cgi-bin/carddisp.pl?gene=UCA1
MIR559	MicroRNA 559	RNA Gene	14	GC02P047377	20.18	https://www.genecards.org/cgi-bin/carddisp.pl?gene=MIR559
GSK3B	Glycogen Synthase Kinase 3 Beta	Protein Coding	51	GC03M119821	20.16	https://www.genecards.org/cgi-bin/carddisp.pl?gene=GSK3B
HSP90AA1	Heat Shock Protein 90 Alpha Family Class A Member 1	Protein Coding	49	GC14M102080	20.15	https://www.genecards.org/cgi-bin/carddisp.pl?gene=HSP90AA1
MEG3	Maternally Expressed 3	RNA Gene	29	GC14P104069	20.14	https://www.genecards.org/cgi-bin/carddisp.pl?gene=MEG3
GAS5	Growth Arrest Specific 5	RNA Gene	22	GC01M174067	20.12	https://www.genecards.org/cgi-bin/carddisp.pl?gene=GAS5
ERBB3	Erb-B2 Receptor Tyrosine Kinase 3	Protein Coding	54	GC12P056080	20.12	https://www.genecards.org/cgi-bin/carddisp.pl?gene=ERBB3
MIR372	MicroRNA 372	RNA Gene	16	GC19P054045	19.98	https://www.genecards.org/cgi-bin/carddisp.pl?gene=MIR372
KRT19	Keratin 19	Protein Coding	46	GC17M041523	19.98	https://www.genecards.org/cgi-bin/carddisp.pl?gene=KRT19
GAST	Gastrin	Protein Coding	41	GC17P041712	19.97	https://www.genecards.org/cgi-bin/carddisp.pl?gene=GAST
MCL1	MCL1 Apoptosis Regulator, BCL2 Family Member	Protein Coding	49	GC01M150643	19.91	https://www.genecards.org/cgi-bin/carddisp.pl?gene=MCL1
CCKBR	Cholecystokinin B Receptor	Protein Coding	46	GC11P006259	19.78	https://www.genecards.org/cgi-bin/carddisp.pl?gene=CCKBR
PTPN12	Protein Tyrosine Phosphatase Non-Receptor Type 12	Protein Coding	46	GC07P077537	19.73	https://www.genecards.org/cgi-bin/carddisp.pl?gene=PTPN12
MIR122	MicroRNA 122	RNA Gene	19	GC18P058451	19.69	https://www.genecards.org/cgi-bin/carddisp.pl?gene=MIR122
IRF1	Interferon Regulatory Factor 1	Protein Coding	49	GC05M132481	19.68	https://www.genecards.org/cgi-bin/carddisp.pl?gene=IRF1
RARB	Retinoic Acid Receptor Beta	Protein Coding	51	GC03P025194	19.61	https://www.genecards.org/cgi-bin/carddisp.pl?gene=RARB
NTN1	Netrin 1	Protein Coding	46	GC17P009021	19.6	https://www.genecards.org/cgi-bin/carddisp.pl?gene=NTN1
TIMP1	TIMP Metallopeptidase Inhibitor 1	Protein Coding	46	GC0XP047583	19.58	https://www.genecards.org/cgi-bin/carddisp.pl?gene=TIMP1
MIRLET7A1	MicroRNA Let-7a-1	RNA Gene	21	GC09P094175	19.55	https://www.genecards.org/cgi-bin/carddisp.pl?gene=MIRLET7A1
TUG1	Taurine Up-Regulated 1	RNA Gene	23	GC22P030969	19.55	https://www.genecards.org/cgi-bin/carddisp.pl?gene=TUG1
YAP1	Yes Associated Protein 1	Protein Coding	49	GC11P102110	19.48	https://www.genecards.org/cgi-bin/carddisp.pl?gene=YAP1
XIST	X Inactive Specific Transcript	RNA Gene	24	GC0XM073820	19.43	https://www.genecards.org/cgi-bin/carddisp.pl?gene=XIST
TIMP2	TIMP Metallopeptidase Inhibitor 2	Protein Coding	45	GC17M078852	19.35	https://www.genecards.org/cgi-bin/carddisp.pl?gene=TIMP2
AGR2	Anterior Gradient 2, Protein Disulphide Isomerase Family Member	Protein Coding	42	GC07M016805	19.28	https://www.genecards.org/cgi-bin/carddisp.pl?gene=AGR2
RPS6KB1	Ribosomal Protein S6 Kinase B1	Protein Coding	50	GC17P059893	19.16	https://www.genecards.org/cgi-bin/carddisp.pl?gene=RPS6KB1
PTGS1	Prostaglandin-Endoperoxide Synthase 1	Protein Coding	48	GC09P122370	19.05	https://www.genecards.org/cgi-bin/carddisp.pl?gene=PTGS1
FOS	Fos Proto-Oncogene, AP-1 Transcription Factor Subunit	Protein Coding	52	GC14P075278	19.04	https://www.genecards.org/cgi-bin/carddisp.pl?gene=FOS
NEAT1	Nuclear Paraspeckle Assembly Transcript 1	RNA Gene	22	GC11P065417	19.01	https://www.genecards.org/cgi-bin/carddisp.pl?gene=NEAT1
MIR148A	MicroRNA 148a	RNA Gene	18	GC07M025993	18.98	https://www.genecards.org/cgi-bin/carddisp.pl?gene=MIR148A
GADD45A	Growth Arrest And DNA Damage Inducible Alpha	Protein Coding	46	GC01P067685	18.91	https://www.genecards.org/cgi-bin/carddisp.pl?gene=GADD45A
SP1	Sp1 Transcription Factor	Protein Coding	45	GC12P053380	18.89	https://www.genecards.org/cgi-bin/carddisp.pl?gene=SP1
IL10	Interleukin 10	Protein Coding	48	GC01M206767	18.85	https://www.genecards.org/cgi-bin/carddisp.pl?gene=IL10
PDGFRA	Platelet Derived Growth Factor Receptor Alpha	Protein Coding	56	GC04P054229	18.75	https://www.genecards.org/cgi-bin/carddisp.pl?gene=PDGFRA
CASP10	Caspase 10	Protein Coding	49	GC02P201182	18.71	https://www.genecards.org/cgi-bin/carddisp.pl?gene=CASP10
MUC4	Mucin 4, Cell Surface Associated	Protein Coding	40	GC03M195746	18.52	https://www.genecards.org/cgi-bin/carddisp.pl?gene=MUC4
MIR532	MicroRNA 532	RNA Gene	15	GC0XP050004	18.45	https://www.genecards.org/cgi-bin/carddisp.pl?gene=MIR532
CTSB	Cathepsin B	Protein Coding	52	GC08M011842	18.44	https://www.genecards.org/cgi-bin/carddisp.pl?gene=CTSB
LINC-ROR	Long Intergenic Non-Protein Coding RNA, Regulator Of Reprogramming	RNA Gene	15	GC18M057054	18.29	https://www.genecards.org/cgi-bin/carddisp.pl?gene=LINC-ROR
SPRY4-IT1	SPRY4 Intronic Transcript 1	RNA Gene	12	GC05U901574	18.25	https://www.genecards.org/cgi-bin/carddisp.pl?gene=SPRY4-IT1
MMP14	Matrix Metallopeptidase 14	Protein Coding	52	GC14P024724	18.2	https://www.genecards.org/cgi-bin/carddisp.pl?gene=MMP14
ITGB1	Integrin Subunit Beta 1	Protein Coding	51	GC10M032900	18.11	https://www.genecards.org/cgi-bin/carddisp.pl?gene=ITGB1
TACC1	Transforming Acidic Coiled-Coil Containing Protein 1	Protein Coding	41	GC08P038728	18.04	https://www.genecards.org/cgi-bin/carddisp.pl?gene=TACC1
SERPINB5	Serpin Family B Member 5	Protein Coding	45	GC18P063476	17.84	https://www.genecards.org/cgi-bin/carddisp.pl?gene=SERPINB5
LGALS3	Galectin 3	Protein Coding	46	GC14P055124	17.77	https://www.genecards.org/cgi-bin/carddisp.pl?gene=LGALS3
FBXW7	F-Box And WD Repeat Domain Containing 7	Protein Coding	45	GC04M152321	17.76	https://www.genecards.org/cgi-bin/carddisp.pl?gene=FBXW7
HOTTIP	HOXA Distal Transcript Antisense RNA	RNA Gene	21	GC07P027198	17.75	https://www.genecards.org/cgi-bin/carddisp.pl?gene=HOTTIP
ABCC3	ATP Binding Cassette Subfamily C Member 3	Protein Coding	47	GC17P050634	17.63	https://www.genecards.org/cgi-bin/carddisp.pl?gene=ABCC3
VEGFD	Vascular Endothelial Growth Factor D	Protein Coding	36	GC0XM015345	17.58	https://www.genecards.org/cgi-bin/carddisp.pl?gene=VEGFD
NOD2	Nucleotide Binding Oligomerization Domain Containing 2	Protein Coding	49	GC16P050693	17.57	https://www.genecards.org/cgi-bin/carddisp.pl?gene=NOD2
AMACR	Alpha-Methylacyl-CoA Racemase	Protein Coding	46	GC05M033986	17.5	https://www.genecards.org/cgi-bin/carddisp.pl?gene=AMACR
HDAC1	Histone Deacetylase 1	Protein Coding	50	GC01P032292	17.45	https://www.genecards.org/cgi-bin/carddisp.pl?gene=HDAC1
CASC2	Cancer Susceptibility 2	RNA Gene	26	GC10P118046	17.32	https://www.genecards.org/cgi-bin/carddisp.pl?gene=CASC2
S100A4	S100 Calcium Binding Protein A4	Protein Coding	45	GC01M153543	17.31	https://www.genecards.org/cgi-bin/carddisp.pl?gene=S100A4
KRT18	Keratin 18	Protein Coding	50	GC12P052948	17.29	https://www.genecards.org/cgi-bin/carddisp.pl?gene=KRT18
MKI67	Marker Of Proliferation Ki-67	Protein Coding	45	GC10M128096	17.21	https://www.genecards.org/cgi-bin/carddisp.pl?gene=MKI67
RHOA	Ras Homolog Family Member A	Protein Coding	47	GC03M049359	17.21	https://www.genecards.org/cgi-bin/carddisp.pl?gene=RHOA
ETS1	ETS Proto-Oncogene 1, Transcription Factor	Protein Coding	50	GC11M128458	17.17	https://www.genecards.org/cgi-bin/carddisp.pl?gene=ETS1
CRCS2	Colorectal Cancer, Susceptibility To, 2	Genetic Locus	3	GC08U901124	17.08	https://www.genecards.org/cgi-bin/carddisp.pl?gene=CRCS2
ZFAS1	ZNFX1 Antisense RNA 1	RNA Gene	19	GC20P049276	17.06	https://www.genecards.org/cgi-bin/carddisp.pl?gene=ZFAS1
PSG2	Pregnancy Specific Beta-1-Glycoprotein 2	Protein Coding	37	GC19M043064	17.03	https://www.genecards.org/cgi-bin/carddisp.pl?gene=PSG2
CRCS11	Colorectal Cancer, Susceptibility To, 11	Genetic Locus	3	GC20U900444	16.93	https://www.genecards.org/cgi-bin/carddisp.pl?gene=CRCS11
CRCS5	Colorectal Cancer, Susceptibility To, 5	Genetic Locus	3	GC10U901096	16.93	https://www.genecards.org/cgi-bin/carddisp.pl?gene=CRCS5
CRCS6	Colorectal Cancer, Susceptibility To, 6	Genetic Locus	3	GC08U901098	16.93	https://www.genecards.org/cgi-bin/carddisp.pl?gene=CRCS6
CRCS9	Colorectal Cancer, Susceptibility To, 9	Genetic Locus	3	GC16U901133	16.93	https://www.genecards.org/cgi-bin/carddisp.pl?gene=CRCS9
MIR30A	MicroRNA 30a	RNA Gene	19	GC06M071403	16.91	https://www.genecards.org/cgi-bin/carddisp.pl?gene=MIR30A
CRCS7	Colorectal Cancer, Susceptibility To, 7	Genetic Locus	2	GC11U901214	16.86	https://www.genecards.org/cgi-bin/carddisp.pl?gene=CRCS7
CRCS8	Colorectal Cancer, Susceptibility To, 8	Genetic Locus	2	GC14U900916	16.86	https://www.genecards.org/cgi-bin/carddisp.pl?gene=CRCS8
BLM	BLM RecQ Like Helicase	Protein Coding	49	GC15P090717	16.79	https://www.genecards.org/cgi-bin/carddisp.pl?gene=BLM
LOC105373796	Uncharacterized LOC105373796	RNA Gene	4	GC02M189852	16.78	https://www.genecards.org/cgi-bin/carddisp.pl?gene=LOC105373796
CRNDE	Colorectal Neoplasia Differentially Expressed	Protein Coding	20	GC16M054845	16.69	https://www.genecards.org/cgi-bin/carddisp.pl?gene=CRNDE
CYTOR	Cytoskeleton Regulator RNA	RNA Gene	17	GC02P087457	16.64	https://www.genecards.org/cgi-bin/carddisp.pl?gene=CYTOR
SNHG16	Small Nucleolar RNA Host Gene 16	RNA Gene	16	GC17P076559	16.46	https://www.genecards.org/cgi-bin/carddisp.pl?gene=SNHG16
HULC	Hepatocellular Carcinoma Up-Regulated Long Non-Coding RNA	RNA Gene	20	GC06P008438	16.41	https://www.genecards.org/cgi-bin/carddisp.pl?gene=HULC
IGFBP2	Insulin Like Growth Factor Binding Protein 2	Protein Coding	45	GC02P216632	16.34	https://www.genecards.org/cgi-bin/carddisp.pl?gene=IGFBP2
NAT1	N-Acetyltransferase 1	Protein Coding	46	GC08P018181	16.31	https://www.genecards.org/cgi-bin/carddisp.pl?gene=NAT1
CSF1R	Colony Stimulating Factor 1 Receptor	Protein Coding	53	GC05M150053	16.29	https://www.genecards.org/cgi-bin/carddisp.pl?gene=CSF1R
RMRP	RNA Component Of Mitochondrial RNA Processing Endoribonuclease	RNA Gene	25	GC09M035655	16.26	https://www.genecards.org/cgi-bin/carddisp.pl?gene=RMRP
HOXA11-AS	HOXA11 Antisense RNA	RNA Gene	19	GC07P027184	16.23	https://www.genecards.org/cgi-bin/carddisp.pl?gene=HOXA11-AS
BAK1	BCL2 Antagonist/Killer 1	Protein Coding	46	GC06M033572	16.1	https://www.genecards.org/cgi-bin/carddisp.pl?gene=BAK1
EPHA3	EPH Receptor A3	Protein Coding	46	GC03P089077	15.97	https://www.genecards.org/cgi-bin/carddisp.pl?gene=EPHA3
AFAP1-AS1	AFAP1 Antisense RNA 1	RNA Gene	15	GC04P007756	15.96	https://www.genecards.org/cgi-bin/carddisp.pl?gene=AFAP1-AS1
ACTG1	Actin Gamma 1	Protein Coding	51	GC17M081509	15.95	https://www.genecards.org/cgi-bin/carddisp.pl?gene=ACTG1
MTA1	Metastasis Associated 1	Protein Coding	44	GC14P105419	15.88	https://www.genecards.org/cgi-bin/carddisp.pl?gene=MTA1
LEF1	Lymphoid Enhancer Binding Factor 1	Protein Coding	48	GC04M108047	15.86	https://www.genecards.org/cgi-bin/carddisp.pl?gene=LEF1
DANCR	Differentiation Antagonizing Non-Protein Coding RNA	RNA Gene	20	GC04P052712	15.82	https://www.genecards.org/cgi-bin/carddisp.pl?gene=DANCR
CDX1	Caudal Type Homeobox 1	Protein Coding	37	GC05P150133	15.79	https://www.genecards.org/cgi-bin/carddisp.pl?gene=CDX1
AREG	Amphiregulin	Protein Coding	45	GC04P074445	15.76	https://www.genecards.org/cgi-bin/carddisp.pl?gene=AREG
GRPR	Gastrin Releasing Peptide Receptor	Protein Coding	44	GC0XP016141	15.73	https://www.genecards.org/cgi-bin/carddisp.pl?gene=GRPR
SERPINA3	Serpin Family A Member 3	Protein Coding	45	GC14P094612	15.73	https://www.genecards.org/cgi-bin/carddisp.pl?gene=SERPINA3
CCND2	Cyclin D2	Protein Coding	51	GC12P006056	15.7	https://www.genecards.org/cgi-bin/carddisp.pl?gene=CCND2
SERPINA1	Serpin Family A Member 1	Protein Coding	50	GC14M094376	15.49	https://www.genecards.org/cgi-bin/carddisp.pl?gene=SERPINA1
TFF1	Trefoil Factor 1	Protein Coding	46	GC21M042362	15.42	https://www.genecards.org/cgi-bin/carddisp.pl?gene=TFF1
PCAT1	Prostate Cancer Associated Transcript 1	RNA Gene	17	GC08P126553	15.41	https://www.genecards.org/cgi-bin/carddisp.pl?gene=PCAT1
SOX2-OT	SOX2 Overlapping Transcript	RNA Gene	20	GC03P180989	15.4	https://www.genecards.org/cgi-bin/carddisp.pl?gene=SOX2-OT
PANDAR	Promoter Of CDKN1A Antisense DNA Damage Activated RNA	RNA Gene	12	GC06M036673	15.38	https://www.genecards.org/cgi-bin/carddisp.pl?gene=PANDAR
TP53COR1	Tumor Protein P53 Pathway Corepressor 1	RNA Gene	9	GC06U903133	15.33	https://www.genecards.org/cgi-bin/carddisp.pl?gene=TP53COR1
PTENP1	Phosphatase And Tensin Homolog Pseudogene 1	Pseudogene	23	GC09M033673	15.3	https://www.genecards.org/cgi-bin/carddisp.pl?gene=PTENP1
PXN	Paxillin	Protein Coding	46	GC12M120210	15.3	https://www.genecards.org/cgi-bin/carddisp.pl?gene=PXN
ELAVL1	ELAV Like RNA Binding Protein 1	Protein Coding	43	GC19M007958	15.28	https://www.genecards.org/cgi-bin/carddisp.pl?gene=ELAVL1
SELE	Selectin E	Protein Coding	45	GC01M169722	15.17	https://www.genecards.org/cgi-bin/carddisp.pl?gene=SELE
MIR497	MicroRNA 497	RNA Gene	18	GC17M007022	15.13	https://www.genecards.org/cgi-bin/carddisp.pl?gene=MIR497
PTPRH	Protein Tyrosine Phosphatase Receptor Type H	Protein Coding	42	GC19M055181	15.09	https://www.genecards.org/cgi-bin/carddisp.pl?gene=PTPRH
EPHA2	EPH Receptor A2	Protein Coding	53	GC01M016124	15.06	https://www.genecards.org/cgi-bin/carddisp.pl?gene=EPHA2
IFNA2	Interferon Alpha 2	Protein Coding	42	GC09M021374	14.94	https://www.genecards.org/cgi-bin/carddisp.pl?gene=IFNA2
SNHG1	Small Nucleolar RNA Host Gene 1	RNA Gene	20	GC11M063021	14.89	https://www.genecards.org/cgi-bin/carddisp.pl?gene=SNHG1
LNCRNA-ATB	Long Noncoding RNA Activated By TGF-Beta	RNA Gene	4	GC14U902188	14.88	https://www.genecards.org/cgi-bin/carddisp.pl?gene=LNCRNA-ATB
USHBP1	USH1 Protein Network Component Harmonin Binding Protein 1	Protein Coding	36	GC19M017249	14.88	https://www.genecards.org/cgi-bin/carddisp.pl?gene=USHBP1
MUC6	Mucin 6, Oligomeric Mucus/Gel-Forming	Protein Coding	39	GC11M001002	14.82	https://www.genecards.org/cgi-bin/carddisp.pl?gene=MUC6
PPARD	Peroxisome Proliferator Activated Receptor Delta	Protein Coding	48	GC06P043340	14.76	https://www.genecards.org/cgi-bin/carddisp.pl?gene=PPARD
HNF1A-AS1	HNF1A Antisense RNA 1	RNA Gene	18	GC12M120991	14.74	https://www.genecards.org/cgi-bin/carddisp.pl?gene=HNF1A-AS1
BCAR4	Breast Cancer Anti-Estrogen Resistance 4	RNA Gene	17	GC16M011819	14.74	https://www.genecards.org/cgi-bin/carddisp.pl?gene=BCAR4
BCYRN1	Brain Cytoplasmic RNA 1	RNA Gene	17	GC02P047331	14.73	https://www.genecards.org/cgi-bin/carddisp.pl?gene=BCYRN1
EPHX1	Epoxide Hydrolase 1	Protein Coding	48	GC01P225810	14.7	https://www.genecards.org/cgi-bin/carddisp.pl?gene=EPHX1
GDF15	Growth Differentiation Factor 15	Protein Coding	43	GC19P020745	14.69	https://www.genecards.org/cgi-bin/carddisp.pl?gene=GDF15
E2F4	E2F Transcription Factor 4	Protein Coding	47	GC16P067192	14.67	https://www.genecards.org/cgi-bin/carddisp.pl?gene=E2F4
TNFRSF10A	TNF Receptor Superfamily Member 10a	Protein Coding	46	GC08M023190	14.52	https://www.genecards.org/cgi-bin/carddisp.pl?gene=TNFRSF10A
XRCC3	X-Ray Repair Cross Complementing 3	Protein Coding	42	GC14M103697	14.5	https://www.genecards.org/cgi-bin/carddisp.pl?gene=XRCC3
RUNX3	RUNX Family Transcription Factor 3	Protein Coding	44	GC01M024899	14.41	https://www.genecards.org/cgi-bin/carddisp.pl?gene=RUNX3
MIR152	MicroRNA 152	RNA Gene	19	GC17M048037	14.38	https://www.genecards.org/cgi-bin/carddisp.pl?gene=MIR152
RNASEL	Ribonuclease L	Protein Coding	45	GC01M182542	14.36	https://www.genecards.org/cgi-bin/carddisp.pl?gene=RNASEL
KLF4	Kruppel Like Factor 4	Protein Coding	47	GC09M107484	14.34	https://www.genecards.org/cgi-bin/carddisp.pl?gene=KLF4
MMP11	Matrix Metallopeptidase 11	Protein Coding	46	GC22P023768	14.33	https://www.genecards.org/cgi-bin/carddisp.pl?gene=MMP11
CEACAM3	CEA Cell Adhesion Molecule 3	Protein Coding	41	GC19P041796	14.29	https://www.genecards.org/cgi-bin/carddisp.pl?gene=CEACAM3
BANCR	BRAF-Activated Non-Protein Coding RNA	RNA Gene	12	GC09M069296	14.23	https://www.genecards.org/cgi-bin/carddisp.pl?gene=BANCR
IFI27	Interferon Alpha Inducible Protein 27	Protein Coding	39	GC14P094104	14.23	https://www.genecards.org/cgi-bin/carddisp.pl?gene=IFI27
CYP17A1	Cytochrome P450 Family 17 Subfamily A Member 1	Protein Coding	50	GC10M102830	14.21	https://www.genecards.org/cgi-bin/carddisp.pl?gene=CYP17A1
TFF3	Trefoil Factor 3	Protein Coding	42	GC21M042311	14.18	https://www.genecards.org/cgi-bin/carddisp.pl?gene=TFF3
MIR196B	MicroRNA 196b	RNA Gene	19	GC07M027167	14.16	https://www.genecards.org/cgi-bin/carddisp.pl?gene=MIR196B
GHET1	Gastric Carcinoma Proliferation Enhancing Transcript 1	RNA Gene	12	GC07P149017	14.11	https://www.genecards.org/cgi-bin/carddisp.pl?gene=GHET1
MIR24-1	MicroRNA 24-1	RNA Gene	17	GC09P095086	14.08	https://www.genecards.org/cgi-bin/carddisp.pl?gene=MIR24-1
FGF7	Fibroblast Growth Factor 7	Protein Coding	43	GC15P049423	14.08	https://www.genecards.org/cgi-bin/carddisp.pl?gene=FGF7
MIRLET7F1	MicroRNA Let-7f-1	RNA Gene	18	GC09P094199	13.98	https://www.genecards.org/cgi-bin/carddisp.pl?gene=MIRLET7F1
IL4	Interleukin 4	Protein Coding	48	GC05P132673	13.96	https://www.genecards.org/cgi-bin/carddisp.pl?gene=IL4
CD36	CD36 Molecule	Protein Coding	50	GC07P080369	13.96	https://www.genecards.org/cgi-bin/carddisp.pl?gene=CD36
MIR9-1	MicroRNA 9-1	RNA Gene	20	GC01M156420	13.89	https://www.genecards.org/cgi-bin/carddisp.pl?gene=MIR9-1
HSPA5	Heat Shock Protein Family A (Hsp70) Member 5	Protein Coding	48	GC09M125234	13.88	https://www.genecards.org/cgi-bin/carddisp.pl?gene=HSPA5
LINC00261	Long Intergenic Non-Protein Coding RNA 261	RNA Gene	19	GC20M022547	13.85	https://www.genecards.org/cgi-bin/carddisp.pl?gene=LINC00261
WNT2B	Wnt Family Member 2B	Protein Coding	46	GC01P112466	13.83	https://www.genecards.org/cgi-bin/carddisp.pl?gene=WNT2B
SNHG20	Small Nucleolar RNA Host Gene 20	RNA Gene	16	GC17P077087	13.7	https://www.genecards.org/cgi-bin/carddisp.pl?gene=SNHG20
PSCA	Prostate Stem Cell Antigen	Protein Coding	40	GC08P142670	13.65	https://www.genecards.org/cgi-bin/carddisp.pl?gene=PSCA
NORAD	Non-Coding RNA Activated By DNA Damage	RNA Gene	14	GC20M036048	13.64	https://www.genecards.org/cgi-bin/carddisp.pl?gene=NORAD
NDRG1	N-Myc Downstream Regulated 1	Protein Coding	46	GC08M133237	13.63	https://www.genecards.org/cgi-bin/carddisp.pl?gene=NDRG1
MIR139	MicroRNA 139	RNA Gene	18	GC11M072615	13.62	https://www.genecards.org/cgi-bin/carddisp.pl?gene=MIR139
RINT1	RAD50 Interactor 1	Protein Coding	37	GC07P105532	13.61	https://www.genecards.org/cgi-bin/carddisp.pl?gene=RINT1
HMGB1	High Mobility Group Box 1	Protein Coding	45	GC13M030456	13.6	https://www.genecards.org/cgi-bin/carddisp.pl?gene=HMGB1
MIR345	MicroRNA 345	RNA Gene	18	GC14P100307	13.58	https://www.genecards.org/cgi-bin/carddisp.pl?gene=MIR345
TMEFF2	Transmembrane Protein With EGF Like And Two Follistatin Like Domains 2	Protein Coding	41	GC02M191950	13.58	https://www.genecards.org/cgi-bin/carddisp.pl?gene=TMEFF2
IL6R	Interleukin 6 Receptor	Protein Coding	49	GC01P154405	13.53	https://www.genecards.org/cgi-bin/carddisp.pl?gene=IL6R
MAX	MYC Associated Factor X	Protein Coding	49	GC14M065009	13.52	https://www.genecards.org/cgi-bin/carddisp.pl?gene=MAX
TLR9	Toll Like Receptor 9	Protein Coding	47	GC03M052222	13.47	https://www.genecards.org/cgi-bin/carddisp.pl?gene=TLR9
HOXA-AS2	HOXA Cluster Antisense RNA 2	RNA Gene	17	GC07P027107	13.47	https://www.genecards.org/cgi-bin/carddisp.pl?gene=HOXA-AS2
EREG	Epiregulin	Protein Coding	44	GC04P074366	13.45	https://www.genecards.org/cgi-bin/carddisp.pl?gene=EREG
CEACAM7	CEA Cell Adhesion Molecule 7	Protein Coding	38	GC19M041673	13.38	https://www.genecards.org/cgi-bin/carddisp.pl?gene=CEACAM7
NNT-AS1	NNT Antisense RNA 1	RNA Gene	14	GC05M043572	13.38	https://www.genecards.org/cgi-bin/carddisp.pl?gene=NNT-AS1
SNAI1	Snail Family Transcriptional Repressor 1	Protein Coding	45	GC20P049982	13.31	https://www.genecards.org/cgi-bin/carddisp.pl?gene=SNAI1
BLACAT1	Bladder Cancer Associated Transcript 1	RNA Gene	15	GC01M205434	13.28	https://www.genecards.org/cgi-bin/carddisp.pl?gene=BLACAT1
REEP5	Receptor Accessory Protein 5	Protein Coding	40	GC05M112876	13.24	https://www.genecards.org/cgi-bin/carddisp.pl?gene=REEP5
MNX1-AS1	MNX1 Antisense RNA 1 (Head To Head)	RNA Gene	16	GC07P157010	13.1	https://www.genecards.org/cgi-bin/carddisp.pl?gene=MNX1-AS1
LGR5	Leucine Rich Repeat Containing G Protein-Coupled Receptor 5	Protein Coding	44	GC12P071439	12.95	https://www.genecards.org/cgi-bin/carddisp.pl?gene=LGR5
ACER3	Alkaline Ceramidase 3	Protein Coding	40	GC11P076860	12.9	https://www.genecards.org/cgi-bin/carddisp.pl?gene=ACER3
KIF5B	Kinesin Family Member 5B	Protein Coding	44	GC10M032035	12.9	https://www.genecards.org/cgi-bin/carddisp.pl?gene=KIF5B
APP	Amyloid Beta Precursor Protein	Protein Coding	52	GC21M025880	12.9	https://www.genecards.org/cgi-bin/carddisp.pl?gene=APP
LINC00472	Long Intergenic Non-Protein Coding RNA 472	RNA Gene	23	GC06M071344	12.87	https://www.genecards.org/cgi-bin/carddisp.pl?gene=LINC00472
LGALS4	Galectin 4	Protein Coding	40	GC19M039713	12.86	https://www.genecards.org/cgi-bin/carddisp.pl?gene=LGALS4
COL1A1	Collagen Type I Alpha 1 Chain	Protein Coding	52	GC17M050183	12.83	https://www.genecards.org/cgi-bin/carddisp.pl?gene=COL1A1
CBR3-AS1	CBR3 Antisense RNA 1	RNA Gene	16	GC21M036131	12.8	https://www.genecards.org/cgi-bin/carddisp.pl?gene=CBR3-AS1
SNHG5	Small Nucleolar RNA Host Gene 5	RNA Gene	20	GC06M085650	12.8	https://www.genecards.org/cgi-bin/carddisp.pl?gene=SNHG5
DDIT3	DNA Damage Inducible Transcript 3	Protein Coding	46	GC12M057516	12.75	https://www.genecards.org/cgi-bin/carddisp.pl?gene=DDIT3
MIR27B	MicroRNA 27b	RNA Gene	20	GC09P095099	12.72	https://www.genecards.org/cgi-bin/carddisp.pl?gene=MIR27B
SNHG12	Small Nucleolar RNA Host Gene 12	RNA Gene	22	GC01M028578	12.7	https://www.genecards.org/cgi-bin/carddisp.pl?gene=SNHG12
ABHD16A	Abhydrolase Domain Containing 16A	Protein Coding	35	GC06M032212	12.67	https://www.genecards.org/cgi-bin/carddisp.pl?gene=ABHD16A
PWRN1	Prader-Willi Region Non-Protein Coding RNA 1	RNA Gene	18	GC15P024395	12.66	https://www.genecards.org/cgi-bin/carddisp.pl?gene=PWRN1
PTGER4	Prostaglandin E Receptor 4	Protein Coding	48	GC05P040679	12.66	https://www.genecards.org/cgi-bin/carddisp.pl?gene=PTGER4
TUSC7	Tumor Suppressor Candidate 7	RNA Gene	16	GC03P116709	12.65	https://www.genecards.org/cgi-bin/carddisp.pl?gene=TUSC7
LRRFIP2	LRR Binding FLII Interacting Protein 2	Protein Coding	38	GC03M037052	12.62	https://www.genecards.org/cgi-bin/carddisp.pl?gene=LRRFIP2
PAK1	P21 (RAC1) Activated Kinase 1	Protein Coding	49	GC11M077321	12.51	https://www.genecards.org/cgi-bin/carddisp.pl?gene=PAK1
CEACAM1	CEA Cell Adhesion Molecule 1	Protein Coding	44	GC19M042507	12.5	https://www.genecards.org/cgi-bin/carddisp.pl?gene=CEACAM1
PRNCR1	Prostate Cancer Associated Non-Coding RNA 1	RNA Gene	14	GC08P127079	12.45	https://www.genecards.org/cgi-bin/carddisp.pl?gene=PRNCR1
MIR339	MicroRNA 339	RNA Gene	18	GC07M001022	12.41	https://www.genecards.org/cgi-bin/carddisp.pl?gene=MIR339
DUXAP9	Double Homeobox A Pseudogene 9	Pseudogene	10	GC14P019209	12.35	https://www.genecards.org/cgi-bin/carddisp.pl?gene=DUXAP9
MUC12	Mucin 12, Cell Surface Associated	Protein Coding	33	GC07P100969	12.3	https://www.genecards.org/cgi-bin/carddisp.pl?gene=MUC12
TINCR	TINCR Ubiquitin Domain Containing	RNA Gene	23	GC19M005558	12.3	https://www.genecards.org/cgi-bin/carddisp.pl?gene=TINCR
GSTT1	Glutathione S-Transferase Theta 1	Protein Coding	34	GC22Mi00270	12.28	https://www.genecards.org/cgi-bin/carddisp.pl?gene=GSTT1
CLDN4	Claudin 4	Protein Coding	42	GC07P073799	12.21	https://www.genecards.org/cgi-bin/carddisp.pl?gene=CLDN4
RNY1	RNA, Ro60-Associated Y1	RNA Gene	16	GC07M148987	12.18	https://www.genecards.org/cgi-bin/carddisp.pl?gene=RNY1
NPTN-IT1	NPTN Intronic Transcript 1	RNA Gene	12	GC15M073566	12.16	https://www.genecards.org/cgi-bin/carddisp.pl?gene=NPTN-IT1
RNY3	RNA, Ro60-Associated Y3	RNA Gene	14	GC07P149013	12.15	https://www.genecards.org/cgi-bin/carddisp.pl?gene=RNY3
GUCY2C	Guanylate Cyclase 2C	Protein Coding	47	GC12M014612	12.14	https://www.genecards.org/cgi-bin/carddisp.pl?gene=GUCY2C
C2orf88	Chromosome 2 Open Reading Frame 88	Protein Coding	33	GC02P189879	12.07	https://www.genecards.org/cgi-bin/carddisp.pl?gene=C2orf88
ORMDL1	ORMDL Sphingolipid Biosynthesis Regulator 1	Protein Coding	36	GC02M189770	11.99	https://www.genecards.org/cgi-bin/carddisp.pl?gene=ORMDL1
UHRF1	Ubiquitin Like With PHD And Ring Finger Domains 1	Protein Coding	41	GC19P004910	11.98	https://www.genecards.org/cgi-bin/carddisp.pl?gene=UHRF1
CEACAM6	CEA Cell Adhesion Molecule 6	Protein Coding	42	GC19P041750	11.96	https://www.genecards.org/cgi-bin/carddisp.pl?gene=CEACAM6
CACNA1G	Calcium Voltage-Gated Channel Subunit Alpha1 G	Protein Coding	49	GC17P050561	11.92	https://www.genecards.org/cgi-bin/carddisp.pl?gene=CACNA1G
SYNE1	Spectrin Repeat Containing Nuclear Envelope Protein 1	Protein Coding	42	GC06M152121	11.8	https://www.genecards.org/cgi-bin/carddisp.pl?gene=SYNE1
KLF5	Kruppel Like Factor 5	Protein Coding	45	GC13P073054	11.8	https://www.genecards.org/cgi-bin/carddisp.pl?gene=KLF5
TP73	Tumor Protein P73	Protein Coding	47	GC01P003652	11.79	https://www.genecards.org/cgi-bin/carddisp.pl?gene=TP73
BACE1-AS	BACE1 Antisense RNA	RNA Gene	12	GC11P117295	11.76	https://www.genecards.org/cgi-bin/carddisp.pl?gene=BACE1-AS
WNT6	Wnt Family Member 6	Protein Coding	44	GC02P218859	11.76	https://www.genecards.org/cgi-bin/carddisp.pl?gene=WNT6
ENPP7	Ectonucleotide Pyrophosphatase/Phosphodiesterase 7	Protein Coding	40	GC17P079730	11.76	https://www.genecards.org/cgi-bin/carddisp.pl?gene=ENPP7
TCF7	Transcription Factor 7	Protein Coding	45	GC05P134114	11.72	https://www.genecards.org/cgi-bin/carddisp.pl?gene=TCF7
SOCS1	Suppressor Of Cytokine Signaling 1	Protein Coding	45	GC16M011255	11.69	https://www.genecards.org/cgi-bin/carddisp.pl?gene=SOCS1
FER1L4	Fer-1 Like Family Member 4 (Pseudogene)	Pseudogene	25	GC20M035558	11.66	https://www.genecards.org/cgi-bin/carddisp.pl?gene=FER1L4
PDCD4	Programmed Cell Death 4	Protein Coding	44	GC10P110871	11.63	https://www.genecards.org/cgi-bin/carddisp.pl?gene=PDCD4
FEZF1-AS1	FEZF1 Antisense RNA 1	RNA Gene	16	GC07P122303	11.62	https://www.genecards.org/cgi-bin/carddisp.pl?gene=FEZF1-AS1
LGALS3BP	Galectin 3 Binding Protein	Protein Coding	42	GC17M078971	11.57	https://www.genecards.org/cgi-bin/carddisp.pl?gene=LGALS3BP
CASC8	Cancer Susceptibility 8	RNA Gene	15	GC08M127359	11.53	https://www.genecards.org/cgi-bin/carddisp.pl?gene=CASC8
ZEB1-AS1	ZEB1 Antisense RNA 1	RNA Gene	16	GC10M031166	11.5	https://www.genecards.org/cgi-bin/carddisp.pl?gene=ZEB1-AS1
GUCA2A	Guanylate Cyclase Activator 2A	Protein Coding	38	GC01M042162	11.42	https://www.genecards.org/cgi-bin/carddisp.pl?gene=GUCA2A
SNHG15	Small Nucleolar RNA Host Gene 15	RNA Gene	18	GC07M044983	11.4	https://www.genecards.org/cgi-bin/carddisp.pl?gene=SNHG15
SNHG6	Small Nucleolar RNA Host Gene 6	RNA Gene	16	GC08M066921	11.36	https://www.genecards.org/cgi-bin/carddisp.pl?gene=SNHG6
WNT2	Wnt Family Member 2	Protein Coding	45	GC07M117276	11.34	https://www.genecards.org/cgi-bin/carddisp.pl?gene=WNT2
BCL2L11	BCL2 Like 11	Protein Coding	46	GC02P111119	11.34	https://www.genecards.org/cgi-bin/carddisp.pl?gene=BCL2L11
WIF1	WNT Inhibitory Factor 1	Protein Coding	46	GC12M065050	11.31	https://www.genecards.org/cgi-bin/carddisp.pl?gene=WIF1
MAGEA1	MAGE Family Member A1	Protein Coding	40	GC0XP153179	11.26	https://www.genecards.org/cgi-bin/carddisp.pl?gene=MAGEA1
TCF3	Transcription Factor 3	Protein Coding	47	GC19M001609	11.24	https://www.genecards.org/cgi-bin/carddisp.pl?gene=TCF3
DPP10-AS1	DPP10 Antisense RNA 1	RNA Gene	15	GC02M115130	11.09	https://www.genecards.org/cgi-bin/carddisp.pl?gene=DPP10-AS1
MIR422A	MicroRNA 422a	RNA Gene	17	GC15M063870	11.09	https://www.genecards.org/cgi-bin/carddisp.pl?gene=MIR422A
MIR7-3	MicroRNA 7-3	RNA Gene	16	GC19P004770	10.95	https://www.genecards.org/cgi-bin/carddisp.pl?gene=MIR7-3
ENSG00000278769		RNA Gene	4	GC15P042724	10.9	https://www.genecards.org/cgi-bin/carddisp.pl?gene=ENSG00000278769
ST6GAL1	ST6 Beta-Galactoside Alpha-2,6-Sialyltransferase 1	Protein Coding	45	GC03P186930	10.89	https://www.genecards.org/cgi-bin/carddisp.pl?gene=ST6GAL1
TFDP1	Transcription Factor Dp-1	Protein Coding	46	GC13P113584	10.89	https://www.genecards.org/cgi-bin/carddisp.pl?gene=TFDP1
DUXAP10	Double Homeobox A Pseudogene 10	Pseudogene	13	GC14M019293	10.76	https://www.genecards.org/cgi-bin/carddisp.pl?gene=DUXAP10
TMEM238L	Transmembrane Protein 238 Like	RNA Gene	15	GC17M010795	10.76	https://www.genecards.org/cgi-bin/carddisp.pl?gene=TMEM238L
GAPLINC	Gastric Adenocarcinoma Associated, Positive CD44 Regulator, Long Intergenic Non-Coding RNA	RNA Gene	14	GC18P003467	10.75	https://www.genecards.org/cgi-bin/carddisp.pl?gene=GAPLINC
TDGF1	Teratocarcinoma-Derived Growth Factor 1	Protein Coding	43	GC03P046576	10.74	https://www.genecards.org/cgi-bin/carddisp.pl?gene=TDGF1
PHLPP1	PH Domain And Leucine Rich Repeat Protein Phosphatase 1	Protein Coding	41	GC18P062715	10.71	https://www.genecards.org/cgi-bin/carddisp.pl?gene=PHLPP1
DES	Desmin	Protein Coding	49	GC02P219418	10.65	https://www.genecards.org/cgi-bin/carddisp.pl?gene=DES
NCRUPAR	Non-Protein Coding RNA, Upstream Of F2R/PAR1	RNA Gene	12	GC05P076711	10.6	https://www.genecards.org/cgi-bin/carddisp.pl?gene=NCRUPAR
MIR129-2	MicroRNA 129-2	RNA Gene	16	GC11P043627	10.6	https://www.genecards.org/cgi-bin/carddisp.pl?gene=MIR129-2
TIAM1	T Cell Lymphoma Invasion And Metastasis 1	Protein Coding	46	GC21M031118	10.56	https://www.genecards.org/cgi-bin/carddisp.pl?gene=TIAM1
CA9	Carbonic Anhydrase 9	Protein Coding	46	GC09P035673	10.55	https://www.genecards.org/cgi-bin/carddisp.pl?gene=CA9
RPL34-AS1	RPL34 Antisense RNA 1 (Head To Head)	RNA Gene	18	GC04M108538	10.53	https://www.genecards.org/cgi-bin/carddisp.pl?gene=RPL34-AS1
FPGS	Folylpolyglutamate Synthase	Protein Coding	43	GC09P127794	10.53	https://www.genecards.org/cgi-bin/carddisp.pl?gene=FPGS
LINC01133	Long Intergenic Non-Protein Coding RNA 1133	RNA Gene	15	GC01P159933	10.49	https://www.genecards.org/cgi-bin/carddisp.pl?gene=LINC01133
SPTB	Spectrin Beta, Erythrocytic	Protein Coding	42	GC14M064746	10.48	https://www.genecards.org/cgi-bin/carddisp.pl?gene=SPTB
HAGLR	HOXD Antisense Growth-Associated Long Non-Coding RNA	RNA Gene	16	GC02M176173	10.47	https://www.genecards.org/cgi-bin/carddisp.pl?gene=HAGLR
HLTF	Helicase Like Transcription Factor	Protein Coding	41	GC03M149030	10.46	https://www.genecards.org/cgi-bin/carddisp.pl?gene=HLTF
FSHR	Follicle Stimulating Hormone Receptor	Protein Coding	49	GC02M048866	10.45	https://www.genecards.org/cgi-bin/carddisp.pl?gene=FSHR
FOXO4	Forkhead Box O4	Protein Coding	44	GC0XP071096	10.42	https://www.genecards.org/cgi-bin/carddisp.pl?gene=FOXO4
IGFBP7	Insulin Like Growth Factor Binding Protein 7	Protein Coding	47	GC04M057030	10.39	https://www.genecards.org/cgi-bin/carddisp.pl?gene=IGFBP7
LINC00460	Long Intergenic Non-Protein Coding RNA 460	RNA Gene	16	GC13P106376	10.34	https://www.genecards.org/cgi-bin/carddisp.pl?gene=LINC00460
TP53TG1	TP53 Target 1	RNA Gene	22	GC07M087325	10.28	https://www.genecards.org/cgi-bin/carddisp.pl?gene=TP53TG1
WT1-AS	WT1 Antisense RNA	RNA Gene	24	GC11P032434	10.28	https://www.genecards.org/cgi-bin/carddisp.pl?gene=WT1-AS
COLCA2	Colorectal Cancer Associated 2	Protein Coding	26	GC11P111298	10.27	https://www.genecards.org/cgi-bin/carddisp.pl?gene=COLCA2
CSE1L	Chromosome Segregation 1 Like	Protein Coding	41	GC20P049046	10.24	https://www.genecards.org/cgi-bin/carddisp.pl?gene=CSE1L
COLCA1	Colorectal Cancer Associated 1	Protein Coding	24	GC11M111290	10.24	https://www.genecards.org/cgi-bin/carddisp.pl?gene=COLCA1
AGO2	Argonaute RISC Catalytic Component 2	Protein Coding	41	GC08M140522	10.22	https://www.genecards.org/cgi-bin/carddisp.pl?gene=AGO2
GPX2	Glutathione Peroxidase 2	Protein Coding	45	GC14M064939	10.16	https://www.genecards.org/cgi-bin/carddisp.pl?gene=GPX2
DDX53	DEAD-Box Helicase 53	Protein Coding	34	GC0XP022999	10.16	https://www.genecards.org/cgi-bin/carddisp.pl?gene=DDX53
MIR95	MicroRNA 95	RNA Gene	17	GC04M008007	10.13	https://www.genecards.org/cgi-bin/carddisp.pl?gene=MIR95
S100A8	S100 Calcium Binding Protein A8	Protein Coding	44	GC01M153391	10.1	https://www.genecards.org/cgi-bin/carddisp.pl?gene=S100A8
PHLPP2	PH Domain And Leucine Rich Repeat Protein Phosphatase 2	Protein Coding	42	GC16M071637	10.09	https://www.genecards.org/cgi-bin/carddisp.pl?gene=PHLPP2
SFRP2	Secreted Frizzled Related Protein 2	Protein Coding	44	GC04M153780	10.08	https://www.genecards.org/cgi-bin/carddisp.pl?gene=SFRP2
HIF1A-AS1	HIF1A Antisense RNA 1	RNA Gene	15	GC14M061681	10.04	https://www.genecards.org/cgi-bin/carddisp.pl?gene=HIF1A-AS1
MIR135B	MicroRNA 135b	RNA Gene	18	GC01M205448	10.01	https://www.genecards.org/cgi-bin/carddisp.pl?gene=MIR135B
LEF1-AS1	LEF1 Antisense RNA 1	RNA Gene	16	GC04P108167	9.99	https://www.genecards.org/cgi-bin/carddisp.pl?gene=LEF1-AS1
DACOR1	DNMT1-Associated Colon Cancer Repressed LncRNA 1	RNA Gene	8	GC15U902209	9.99	https://www.genecards.org/cgi-bin/carddisp.pl?gene=DACOR1
ANXA2	Annexin A2	Protein Coding	49	GC15M060347	9.92	https://www.genecards.org/cgi-bin/carddisp.pl?gene=ANXA2
EGOT	Eosinophil Granule Ontogeny Transcript	RNA Gene	20	GC03M004790	9.91	https://www.genecards.org/cgi-bin/carddisp.pl?gene=EGOT
FAM83H-AS1	FAM83H Antisense RNA 1 (Head To Head)	RNA Gene	17	GC08P143734	9.9	https://www.genecards.org/cgi-bin/carddisp.pl?gene=FAM83H-AS1
LINC00858	Long Intergenic Non-Protein Coding RNA 858	RNA Gene	14	GC10P084279	9.84	https://www.genecards.org/cgi-bin/carddisp.pl?gene=LINC00858
ST3GAL4	ST3 Beta-Galactoside Alpha-2,3-Sialyltransferase 4	Protein Coding	42	GC11P126355	9.81	https://www.genecards.org/cgi-bin/carddisp.pl?gene=ST3GAL4
RIOX2	Ribosomal Oxygenase 2	Protein Coding	33	GC03M097942	9.78	https://www.genecards.org/cgi-bin/carddisp.pl?gene=RIOX2
LINC00673	Long Intergenic Non-Protein Coding RNA 673	RNA Gene	15	GC17M072290	9.74	https://www.genecards.org/cgi-bin/carddisp.pl?gene=LINC00673
FZD10	Frizzled Class Receptor 10	Protein Coding	44	GC12P130162	9.7	https://www.genecards.org/cgi-bin/carddisp.pl?gene=FZD10
LINC01772	Long Intergenic Non-Protein Coding RNA 1772	RNA Gene	11	GC01P016465	9.7	https://www.genecards.org/cgi-bin/carddisp.pl?gene=LINC01772
COMT	Catechol-O-Methyltransferase	Protein Coding	52	GC22P019941	9.66	https://www.genecards.org/cgi-bin/carddisp.pl?gene=COMT
REG4	Regenerating Family Member 4	Protein Coding	41	GC01M119794	9.65	https://www.genecards.org/cgi-bin/carddisp.pl?gene=REG4
SQSTM1	Sequestosome 1	Protein Coding	50	GC05P179806	9.55	https://www.genecards.org/cgi-bin/carddisp.pl?gene=SQSTM1
SNHG7	Small Nucleolar RNA Host Gene 7	RNA Gene	20	GC09M136721	9.51	https://www.genecards.org/cgi-bin/carddisp.pl?gene=SNHG7
FTX	FTX Transcript, XIST Regulator	RNA Gene	18	GC0XM073946	9.47	https://www.genecards.org/cgi-bin/carddisp.pl?gene=FTX
CASC11	Cancer Susceptibility 11	RNA Gene	15	GC08M127686	9.44	https://www.genecards.org/cgi-bin/carddisp.pl?gene=CASC11
FENDRR	FOXF1 Adjacent Non-Coding Developmental Regulatory RNA	RNA Gene	18	GC16M086511	9.39	https://www.genecards.org/cgi-bin/carddisp.pl?gene=FENDRR
MIR92A2	MicroRNA 92a-2	RNA Gene	14	GC0XM134235	9.39	https://www.genecards.org/cgi-bin/carddisp.pl?gene=MIR92A2
ERCC6	ERCC Excision Repair 6, Chromatin Remodeling Factor	Protein Coding	46	GC10M049454	9.36	https://www.genecards.org/cgi-bin/carddisp.pl?gene=ERCC6
MYH11	Myosin Heavy Chain 11	Protein Coding	47	GC16M015704	9.32	https://www.genecards.org/cgi-bin/carddisp.pl?gene=MYH11
CASP1	Caspase 1	Protein Coding	51	GC11M105025	9.27	https://www.genecards.org/cgi-bin/carddisp.pl?gene=CASP1
FAM98A	Family With Sequence Similarity 98 Member A	Protein Coding	33	GC02M033583	9.25	https://www.genecards.org/cgi-bin/carddisp.pl?gene=FAM98A
HOTAIRM1	HOXA Transcript Antisense RNA, Myeloid-Specific 1	RNA Gene	17	GC07P027095	9.24	https://www.genecards.org/cgi-bin/carddisp.pl?gene=HOTAIRM1
HMMR	Hyaluronan Mediated Motility Receptor	Protein Coding	43	GC05P163480	9.22	https://www.genecards.org/cgi-bin/carddisp.pl?gene=HMMR
HEIH	Hepatocellular Carcinoma Up-Regulated EZH2-Associated Long Non-Coding RNA	RNA Gene	13	GC05M180826	9.22	https://www.genecards.org/cgi-bin/carddisp.pl?gene=HEIH
LINC01567	Long Intergenic Non-Protein Coding RNA 1567	RNA Gene	18	GC16M024661	9.2	https://www.genecards.org/cgi-bin/carddisp.pl?gene=LINC01567
MIR675	MicroRNA 675	RNA Gene	16	GC11M001997	9.14	https://www.genecards.org/cgi-bin/carddisp.pl?gene=MIR675
NUDT1	Nudix Hydrolase 1	Protein Coding	43	GC07P002242	9.14	https://www.genecards.org/cgi-bin/carddisp.pl?gene=NUDT1
TUSC8	Tumor Suppressor Candidate 8	RNA Gene	13	GC13M044400	9.13	https://www.genecards.org/cgi-bin/carddisp.pl?gene=TUSC8
GACAT2	Gastric Cancer Associated Transcript 2	RNA Gene	15	GC18M008695	9.12	https://www.genecards.org/cgi-bin/carddisp.pl?gene=GACAT2
MIR454	MicroRNA 454	RNA Gene	18	GC17M059137	9.11	https://www.genecards.org/cgi-bin/carddisp.pl?gene=MIR454
AOC4P	Amine Oxidase Copper Containing 4, Pseudogene	Pseudogene	14	GC17P042865	9.09	https://www.genecards.org/cgi-bin/carddisp.pl?gene=AOC4P
HOXB-AS3	HOXB Cluster Antisense RNA 3	RNA Gene	17	GC17P048549	9.07	https://www.genecards.org/cgi-bin/carddisp.pl?gene=HOXB-AS3
MIR130B	MicroRNA 130b	RNA Gene	17	GC22P022247	9.06	https://www.genecards.org/cgi-bin/carddisp.pl?gene=MIR130B
SNHG3	Small Nucleolar RNA Host Gene 3	RNA Gene	17	GC01P028506	9.05	https://www.genecards.org/cgi-bin/carddisp.pl?gene=SNHG3
MIR31HG	MIR31 Host Gene	RNA Gene	18	GC09M021411	9.04	https://www.genecards.org/cgi-bin/carddisp.pl?gene=MIR31HG
HIF1A-AS2	HIF1A Antisense RNA 2	RNA Gene	15	GC14M061715	8.98	https://www.genecards.org/cgi-bin/carddisp.pl?gene=HIF1A-AS2
LINC-PINT	Long Intergenic Non-Protein Coding RNA, P53 Induced Transcript	RNA Gene	16	GC07M130894	8.85	https://www.genecards.org/cgi-bin/carddisp.pl?gene=LINC-PINT
SOX5	SRY-Box Transcription Factor 5	Protein Coding	48	GC12M023529	8.79	https://www.genecards.org/cgi-bin/carddisp.pl?gene=SOX5
CAHM	Colon Adenocarcinoma Hypermethylated	RNA Gene	16	GC06M163413	8.74	https://www.genecards.org/cgi-bin/carddisp.pl?gene=CAHM
MAMDC2-AS1	MAMDC2 Antisense RNA 1	RNA Gene	12	GC09M070036	8.73	https://www.genecards.org/cgi-bin/carddisp.pl?gene=MAMDC2-AS1
GSEC	G-Quadruplex Forming Sequence Containing LncRNA	RNA Gene	13	GC11M126340	8.73	https://www.genecards.org/cgi-bin/carddisp.pl?gene=GSEC
CASC9	Cancer Susceptibility 9	RNA Gene	14	GC08M075132	8.71	https://www.genecards.org/cgi-bin/carddisp.pl?gene=CASC9
RBM5-AS1	RBM5 Antisense RNA 1	RNA Gene	11	GC03M050099	8.7	https://www.genecards.org/cgi-bin/carddisp.pl?gene=RBM5-AS1
CASC19	Cancer Susceptibility 19	RNA Gene	14	GC08M127357	8.66	https://www.genecards.org/cgi-bin/carddisp.pl?gene=CASC19
LINC00659	Long Intergenic Non-Protein Coding RNA 659	RNA Gene	15	GC20M062774	8.64	https://www.genecards.org/cgi-bin/carddisp.pl?gene=LINC00659
ASS1	Argininosuccinate Synthase 1	Protein Coding	49	GC09P130444	8.62	https://www.genecards.org/cgi-bin/carddisp.pl?gene=ASS1
DLEU1	Deleted In Lymphocytic Leukemia 1	RNA Gene	28	GC13P050084	8.61	https://www.genecards.org/cgi-bin/carddisp.pl?gene=DLEU1
HPRT1	Hypoxanthine Phosphoribosyltransferase 1	Protein Coding	48	GC0XP134460	8.61	https://www.genecards.org/cgi-bin/carddisp.pl?gene=HPRT1
SLC25A25-AS1	SLC25A25 Antisense RNA 1	RNA Gene	13	GC09M128108	8.57	https://www.genecards.org/cgi-bin/carddisp.pl?gene=SLC25A25-AS1
CLMAT3	Colorectal Liver Metastasis Associated Transcript 3	RNA Gene	12	GC05P151677	8.48	https://www.genecards.org/cgi-bin/carddisp.pl?gene=CLMAT3
LAMC1-AS1	LAMC1 Antisense RNA 1	RNA Gene	11	GC01M183138	8.48	https://www.genecards.org/cgi-bin/carddisp.pl?gene=LAMC1-AS1
DLGAP4-AS1	DLGAP4 Antisense RNA 1	RNA Gene	14	GC20M036507	8.47	https://www.genecards.org/cgi-bin/carddisp.pl?gene=DLGAP4-AS1
POU5F1P4	POU Class 5 Homeobox 1 Pseudogene 4	Pseudogene	17	GC01P155446	8.47	https://www.genecards.org/cgi-bin/carddisp.pl?gene=POU5F1P4
AIFM1	Apoptosis Inducing Factor Mitochondria Associated 1	Protein Coding	50	GC0XM130129	8.47	https://www.genecards.org/cgi-bin/carddisp.pl?gene=AIFM1
BTG3-AS1	BTG3 Antisense RNA 1	RNA Gene	10	GC21P017612	8.47	https://www.genecards.org/cgi-bin/carddisp.pl?gene=BTG3-AS1
SNHG17	Small Nucleolar RNA Host Gene 17	RNA Gene	17	GC20M038420	8.46	https://www.genecards.org/cgi-bin/carddisp.pl?gene=SNHG17
DLEU7-AS1	DLEU7 Antisense RNA 1	RNA Gene	16	GC13P050087	8.39	https://www.genecards.org/cgi-bin/carddisp.pl?gene=DLEU7-AS1
FOXP4-AS1	FOXP4 Antisense RNA 1	RNA Gene	14	GC06M041494	8.39	https://www.genecards.org/cgi-bin/carddisp.pl?gene=FOXP4-AS1
VIM-AS1	VIM Antisense RNA 1	RNA Gene	15	GC10M017172	8.39	https://www.genecards.org/cgi-bin/carddisp.pl?gene=VIM-AS1
FBXL19-AS1	FBXL19 Antisense RNA 1	RNA Gene	19	GC16M030932	8.39	https://www.genecards.org/cgi-bin/carddisp.pl?gene=FBXL19-AS1
WSPAR	WNT Signaling Pathway Activating Non-Coding RNA	RNA Gene	12	GC05P133914	8.38	https://www.genecards.org/cgi-bin/carddisp.pl?gene=WSPAR
LINC00538	Long Intergenic Non-Protein Coding RNA 538	RNA Gene	11	GC01P213924	8.36	https://www.genecards.org/cgi-bin/carddisp.pl?gene=LINC00538
ZNF582-AS1	ZNF582 Antisense RNA 1 (Head To Head)	RNA Gene	14	GC19P056394	8.35	https://www.genecards.org/cgi-bin/carddisp.pl?gene=ZNF582-AS1
GACAT3	Gastric Cancer Associated Transcript 3	RNA Gene	14	GC02P016050	8.35	https://www.genecards.org/cgi-bin/carddisp.pl?gene=GACAT3
LINC01617	Long Intergenic Non-Protein Coding RNA 1617	RNA Gene	12	GC08P073879	8.35	https://www.genecards.org/cgi-bin/carddisp.pl?gene=LINC01617
SBDSP1	SBDS Pseudogene 1	Pseudogene	17	GC07P072830	8.34	https://www.genecards.org/cgi-bin/carddisp.pl?gene=SBDSP1
ENSG00000260196		RNA Gene	8	GC11P017382	8.34	https://www.genecards.org/cgi-bin/carddisp.pl?gene=ENSG00000260196
C10orf143	Chromosome 10 Open Reading Frame 143	Protein Coding	14	GC10M130020	8.34	https://www.genecards.org/cgi-bin/carddisp.pl?gene=C10orf143
LINC01507	Long Intergenic Non-Protein Coding RNA 1507	RNA Gene	14	GC09P079824	8.33	https://www.genecards.org/cgi-bin/carddisp.pl?gene=LINC01507
SOX21-AS1	SOX21 Antisense Divergent Transcript 1	RNA Gene	16	GC13P094712	8.33	https://www.genecards.org/cgi-bin/carddisp.pl?gene=SOX21-AS1
DNAH8	Dynein Axonemal Heavy Chain 8	Protein Coding	38	GC06P043390	8.32	https://www.genecards.org/cgi-bin/carddisp.pl?gene=DNAH8
LINC02086	Long Intergenic Non-Protein Coding RNA 2086	RNA Gene	9	GC17P048643	8.32	https://www.genecards.org/cgi-bin/carddisp.pl?gene=LINC02086
LINC01234	Long Intergenic Non-Protein Coding RNA 1234	RNA Gene	16	GC12M113584	8.31	https://www.genecards.org/cgi-bin/carddisp.pl?gene=LINC01234
MROCKI	MARCKS Cis Regulating LncRNA Promoter Of Cytokines And Inflammation	RNA Gene	13	GC06M113869	8.31	https://www.genecards.org/cgi-bin/carddisp.pl?gene=MROCKI
FGF7P5	Fibroblast Growth Factor 7 Pseudogene 5	Pseudogene	8	GC09P042629	8.3	https://www.genecards.org/cgi-bin/carddisp.pl?gene=FGF7P5
GABPB1-AS1	GABPB1 Antisense RNA 1	RNA Gene	13	GC15P050354	8.3	https://www.genecards.org/cgi-bin/carddisp.pl?gene=GABPB1-AS1
PURPL	P53 Upregulated Regulator Of P53 Levels	RNA Gene	10	GC05P027217	8.3	https://www.genecards.org/cgi-bin/carddisp.pl?gene=PURPL
PINCR	P53-Induced Noncoding RNA	RNA Gene	10	GC0XP043177	8.3	https://www.genecards.org/cgi-bin/carddisp.pl?gene=PINCR
HIPK1-AS1	HIPK1 Antisense RNA 1	RNA Gene	13	GC01M113924	8.29	https://www.genecards.org/cgi-bin/carddisp.pl?gene=HIPK1-AS1
ENSG00000257241		RNA Gene	7	GC12M069946	8.29	https://www.genecards.org/cgi-bin/carddisp.pl?gene=ENSG00000257241
ENSG00000266680		RNA Gene	7	GC06M063571	8.29	https://www.genecards.org/cgi-bin/carddisp.pl?gene=ENSG00000266680
OR3A4P	Olfactory Receptor Family 3 Subfamily A Member 4 Pseudogene	Pseudogene	24	GC17P003310	8.27	https://www.genecards.org/cgi-bin/carddisp.pl?gene=OR3A4P
EHHADH-AS1	EHHADH Antisense RNA 1	RNA Gene	14	GC03P185162	8.27	https://www.genecards.org/cgi-bin/carddisp.pl?gene=EHHADH-AS1
MACROD2-AS1	MACROD2 Antisense RNA 1	RNA Gene	14	GC20M014866	8.27	https://www.genecards.org/cgi-bin/carddisp.pl?gene=MACROD2-AS1
LINC02446	Long Intergenic Non-Protein Coding RNA 2446	RNA Gene	9	GC12P010552	8.27	https://www.genecards.org/cgi-bin/carddisp.pl?gene=LINC02446
LINC00628	Long Intergenic Non-Protein Coding RNA 628	RNA Gene	13	GC01M204371	8.24	https://www.genecards.org/cgi-bin/carddisp.pl?gene=LINC00628
SEC63P1	SEC63 Homolog, Protein Translocation Regulator Pseudogene 1	Pseudogene	9	GC01P097545	8.24	https://www.genecards.org/cgi-bin/carddisp.pl?gene=SEC63P1
LINC02223	Long Intergenic Non-Protein Coding RNA 2223	RNA Gene	9	GC05P017739	8.24	https://www.genecards.org/cgi-bin/carddisp.pl?gene=LINC02223
ENSG00000228082		RNA Gene	9	GC06P100427	8.24	https://www.genecards.org/cgi-bin/carddisp.pl?gene=ENSG00000228082
ENSG00000237588		RNA Gene	8	GC01M156687	8.24	https://www.genecards.org/cgi-bin/carddisp.pl?gene=ENSG00000237588
LINC00901	Long Intergenic Non-Protein Coding RNA 901	RNA Gene	13	GC03P116922	8.2	https://www.genecards.org/cgi-bin/carddisp.pl?gene=LINC00901
LINC00052	Long Intergenic Non-Protein Coding RNA 52	RNA Gene	19	GC15P087576	8.15	https://www.genecards.org/cgi-bin/carddisp.pl?gene=LINC00052
ERVH48-1	Endogenous Retrovirus Group 48 Member 1	Protein Coding	16	GC21M042916	8.1	https://www.genecards.org/cgi-bin/carddisp.pl?gene=ERVH48-1
CDH17	Cadherin 17	Protein Coding	42	GC08M094127	7.85	https://www.genecards.org/cgi-bin/carddisp.pl?gene=CDH17
TFF2	Trefoil Factor 2	Protein Coding	42	GC21M042346	7.84	https://www.genecards.org/cgi-bin/carddisp.pl?gene=TFF2
CCN1	Cellular Communication Network Factor 1	Protein Coding	33	GC01P085581	7.63	https://www.genecards.org/cgi-bin/carddisp.pl?gene=CCN1
MUC3A	Mucin 3A, Cell Surface Associated	Protein Coding	36	GC07P100949	7.59	https://www.genecards.org/cgi-bin/carddisp.pl?gene=MUC3A
CA2	Carbonic Anhydrase 2	Protein Coding	52	GC08P085463	7.58	https://www.genecards.org/cgi-bin/carddisp.pl?gene=CA2
CASC15	Cancer Susceptibility 15	RNA Gene	19	GC06P021669	7.56	https://www.genecards.org/cgi-bin/carddisp.pl?gene=CASC15
HOXA13	Homeobox A13	Protein Coding	44	GC07M027200	7.55	https://www.genecards.org/cgi-bin/carddisp.pl?gene=HOXA13
IQGAP1	IQ Motif Containing GTPase Activating Protein 1	Protein Coding	45	GC15P090388	7.55	https://www.genecards.org/cgi-bin/carddisp.pl?gene=IQGAP1
COL11A1	Collagen Type XI Alpha 1 Chain	Protein Coding	44	GC01M102876	7.46	https://www.genecards.org/cgi-bin/carddisp.pl?gene=COL11A1
MIR4435-2HG	MIR4435-2 Host Gene	RNA Gene	15	GC02M111037	7.26	https://www.genecards.org/cgi-bin/carddisp.pl?gene=MIR4435-2HG
SGK1	Serum/Glucocorticoid Regulated Kinase 1	Protein Coding	50	GC06M134169	7.23	https://www.genecards.org/cgi-bin/carddisp.pl?gene=SGK1
AGAP2-AS1	AGAP2 Antisense RNA 1	RNA Gene	14	GC12P057726	7.09	https://www.genecards.org/cgi-bin/carddisp.pl?gene=AGAP2-AS1
GKN1	Gastrokine 1	Protein Coding	39	GC02P068974	7.02	https://www.genecards.org/cgi-bin/carddisp.pl?gene=GKN1
JUP	Junction Plakoglobin	Protein Coding	48	GC17M041754	7.01	https://www.genecards.org/cgi-bin/carddisp.pl?gene=JUP
CNDP2	Carnosine Dipeptidase 2	Protein Coding	44	GC18P074495	6.86	https://www.genecards.org/cgi-bin/carddisp.pl?gene=CNDP2
CACYBP	Calcyclin Binding Protein	Protein Coding	41	GC01P174968	6.86	https://www.genecards.org/cgi-bin/carddisp.pl?gene=CACYBP
WNT9A	Wnt Family Member 9A	Protein Coding	42	GC01M227920	6.82	https://www.genecards.org/cgi-bin/carddisp.pl?gene=WNT9A
DAPK1	Death Associated Protein Kinase 1	Protein Coding	49	GC09P087497	6.8	https://www.genecards.org/cgi-bin/carddisp.pl?gene=DAPK1
ABHD11-AS1	ABHD11 Antisense RNA 1 (Tail To Tail)	RNA Gene	15	GC07P073735	6.77	https://www.genecards.org/cgi-bin/carddisp.pl?gene=ABHD11-AS1
VTRNA2-1	Vault RNA 2-1	RNA Gene	14	GC05M136081	6.72	https://www.genecards.org/cgi-bin/carddisp.pl?gene=VTRNA2-1
URGCP	Upregulator Of Cell Proliferation	Protein Coding	36	GC07M043876	6.64	https://www.genecards.org/cgi-bin/carddisp.pl?gene=URGCP
MIR423	MicroRNA 423	RNA Gene	17	GC17P030117	6.58	https://www.genecards.org/cgi-bin/carddisp.pl?gene=MIR423
MDC1-AS1	MDC1 Antisense RNA 1	RNA Gene	13	GC06P032581	6.55	https://www.genecards.org/cgi-bin/carddisp.pl?gene=MDC1-AS1
GKN2	Gastrokine 2	Protein Coding	36	GC02M068908	6.48	https://www.genecards.org/cgi-bin/carddisp.pl?gene=GKN2
HDAC2	Histone Deacetylase 2	Protein Coding	53	GC06M113933	6.47	https://www.genecards.org/cgi-bin/carddisp.pl?gene=HDAC2
CAPN9	Calpain 9	Protein Coding	44	GC01P230747	6.32	https://www.genecards.org/cgi-bin/carddisp.pl?gene=CAPN9
SLC10A2	Solute Carrier Family 10 Member 2	Protein Coding	41	GC13M103043	6.3	https://www.genecards.org/cgi-bin/carddisp.pl?gene=SLC10A2
TCN2	Transcobalamin 2	Protein Coding	45	GC22P030606	6.25	https://www.genecards.org/cgi-bin/carddisp.pl?gene=TCN2
RUFY3	RUN And FYVE Domain Containing 3	Protein Coding	36	GC04P070704	6.22	https://www.genecards.org/cgi-bin/carddisp.pl?gene=RUFY3
LINC00941	Long Intergenic Non-Protein Coding RNA 941	RNA Gene	14	GC12P030757	6.22	https://www.genecards.org/cgi-bin/carddisp.pl?gene=LINC00941
HAGLROS	HAGLR Opposite Strand LncRNA	RNA Gene	14	GC02P176177	6.19	https://www.genecards.org/cgi-bin/carddisp.pl?gene=HAGLROS
SPTAN1	Spectrin Alpha, Non-Erythrocytic 1	Protein Coding	49	GC09P128552	6.17	https://www.genecards.org/cgi-bin/carddisp.pl?gene=SPTAN1
SUMO1P3	SUMO1 Pseudogene 3	Pseudogene	13	GC01P160317	6.16	https://www.genecards.org/cgi-bin/carddisp.pl?gene=SUMO1P3
MT1DP	Metallothionein 1D, Pseudogene	Pseudogene	23	GC16P056643	6.1	https://www.genecards.org/cgi-bin/carddisp.pl?gene=MT1DP
DUXAP8	Double Homeobox A Pseudogene 8	Pseudogene	11	GC22P015784	6.1	https://www.genecards.org/cgi-bin/carddisp.pl?gene=DUXAP8
CCDC136	Coiled-Coil Domain Containing 136	Protein Coding	36	GC07P129139	6.08	https://www.genecards.org/cgi-bin/carddisp.pl?gene=CCDC136
DMTF1	Cyclin D Binding Myb Like Transcription Factor 1	Protein Coding	36	GC07P087155	6.01	https://www.genecards.org/cgi-bin/carddisp.pl?gene=DMTF1
TDRG1	Testis Development Related 1	RNA Gene	23	GC06P043407	6	https://www.genecards.org/cgi-bin/carddisp.pl?gene=TDRG1
VPS9D1-AS1	VPS9D1 Antisense RNA 1	RNA Gene	14	GC16P089711	5.93	https://www.genecards.org/cgi-bin/carddisp.pl?gene=VPS9D1-AS1
TGIF1	TGFB Induced Factor Homeobox 1	Protein Coding	46	GC18P003411	5.88	https://www.genecards.org/cgi-bin/carddisp.pl?gene=TGIF1
PRSS21	Serine Protease 21	Protein Coding	42	GC16P003877	5.88	https://www.genecards.org/cgi-bin/carddisp.pl?gene=PRSS21
SFTA1P	Surfactant Associated 1, Pseudogene	Pseudogene	17	GC10M010784	5.87	https://www.genecards.org/cgi-bin/carddisp.pl?gene=SFTA1P
PCNA-AS1	PCNA Antisense RNA 1	RNA Gene	10	GC20P005119	5.87	https://www.genecards.org/cgi-bin/carddisp.pl?gene=PCNA-AS1
GATA6-AS1	GATA6 Antisense RNA 1 (Head To Head)	RNA Gene	14	GC18M022166	5.87	https://www.genecards.org/cgi-bin/carddisp.pl?gene=GATA6-AS1
FRGCA	FOXM1-Regulated, Gastric Cancer Associated	RNA Gene	13	GC21M043141	5.86	https://www.genecards.org/cgi-bin/carddisp.pl?gene=FRGCA
ENTPD1-AS1	ENTPD1 Antisense RNA 1	RNA Gene	15	GC10M095753	5.86	https://www.genecards.org/cgi-bin/carddisp.pl?gene=ENTPD1-AS1
MSTO2P	Misato Family Member 2, Pseudogene	Pseudogene	15	GC01P155745	5.86	https://www.genecards.org/cgi-bin/carddisp.pl?gene=MSTO2P
SNHG8	Small Nucleolar RNA Host Gene 8	RNA Gene	18	GC04P118278	5.86	https://www.genecards.org/cgi-bin/carddisp.pl?gene=SNHG8
ENSG00000266990		RNA Gene	6	GC19M000999	5.84	https://www.genecards.org/cgi-bin/carddisp.pl?gene=ENSG00000266990
LINC00668	Long Intergenic Non-Protein Coding RNA 668	RNA Gene	17	GC18M006922	5.8	https://www.genecards.org/cgi-bin/carddisp.pl?gene=LINC00668
PANTR1	POU3F3 Adjacent Non-Coding Transcript 1	RNA Gene	14	GC02M104656	5.75	https://www.genecards.org/cgi-bin/carddisp.pl?gene=PANTR1
ZMAT1	Zinc Finger Matrin-Type 1	Protein Coding	34	GC0XM101882	5.73	https://www.genecards.org/cgi-bin/carddisp.pl?gene=ZMAT1
TRERNA1	Translation Regulatory Long Non-Coding RNA 1	RNA Gene	14	GC20M050040	5.72	https://www.genecards.org/cgi-bin/carddisp.pl?gene=TRERNA1
XRCC5	X-Ray Repair Cross Complementing 5	Protein Coding	45	GC02P216107	5.7	https://www.genecards.org/cgi-bin/carddisp.pl?gene=XRCC5
RPS20	Ribosomal Protein S20	Protein Coding	44	GC08M056067	5.69	https://www.genecards.org/cgi-bin/carddisp.pl?gene=RPS20
SMIM31	Small Integral Membrane Protein 31	Protein Coding	13	GC04P164755	5.68	https://www.genecards.org/cgi-bin/carddisp.pl?gene=SMIM31
KRT7-AS	KRT7 Antisense RNA 1	RNA Gene	11	GC12M052246	5.68	https://www.genecards.org/cgi-bin/carddisp.pl?gene=KRT7-AS
ENSG00000249201		Uncategorized	6	GC05M001173	5.67	https://www.genecards.org/cgi-bin/carddisp.pl?gene=ENSG00000249201
CEBPA-DT	CEBPA Divergent Transcript	RNA Gene	14	GC19P033303	5.67	https://www.genecards.org/cgi-bin/carddisp.pl?gene=CEBPA-DT
ENSG00000225032		Uncategorized	8	GC09P127817	5.66	https://www.genecards.org/cgi-bin/carddisp.pl?gene=ENSG00000225032
EGFLAM-AS1	EGFLAM Antisense RNA 1	RNA Gene	12	GC05M038426	5.64	https://www.genecards.org/cgi-bin/carddisp.pl?gene=EGFLAM-AS1
AFDN-DT	AFDN Divergent Transcript	RNA Gene	16	GC06M167829	5.64	https://www.genecards.org/cgi-bin/carddisp.pl?gene=AFDN-DT
SNHG14	Small Nucleolar RNA Host Gene 14	RNA Gene	14	GC15P024824	5.64	https://www.genecards.org/cgi-bin/carddisp.pl?gene=SNHG14
PRDM16-DT	PRDM16 Divergent Transcript	RNA Gene	17	GC01M003059	5.63	https://www.genecards.org/cgi-bin/carddisp.pl?gene=PRDM16-DT
LINC01006	Long Intergenic Non-Protein Coding RNA 1006	RNA Gene	21	GC07M156388	5.62	https://www.genecards.org/cgi-bin/carddisp.pl?gene=LINC01006
BNC2-AS1	BNC2 Antisense RNA 1	RNA Gene	13	GC09P016727	5.61	https://www.genecards.org/cgi-bin/carddisp.pl?gene=BNC2-AS1
INTS7	Integrator Complex Subunit 7	Protein Coding	37	GC01M211940	5.6	https://www.genecards.org/cgi-bin/carddisp.pl?gene=INTS7
TNFRSF10A-AS1	TNFRSF10A Antisense RNA 1	RNA Gene	10	GC08P023190	5.59	https://www.genecards.org/cgi-bin/carddisp.pl?gene=TNFRSF10A-AS1
GPR65	G Protein-Coupled Receptor 65	Protein Coding	40	GC14P088005	5.58	https://www.genecards.org/cgi-bin/carddisp.pl?gene=GPR65
RN7SK	RNA Component Of 7SK Nuclear Ribonucleoprotein	RNA Gene	20	GC06P052995	5.57	https://www.genecards.org/cgi-bin/carddisp.pl?gene=RN7SK
MAP3K20-AS1	MAP3K20 Antisense RNA 1	RNA Gene	13	GC02M173168	5.57	https://www.genecards.org/cgi-bin/carddisp.pl?gene=MAP3K20-AS1
ANXA2P2	Annexin A2 Pseudogene 2	Pseudogene	24	GC09P034380	5.56	https://www.genecards.org/cgi-bin/carddisp.pl?gene=ANXA2P2
ENSG00000285159		RNA Gene	5	GC06P159018	5.55	https://www.genecards.org/cgi-bin/carddisp.pl?gene=ENSG00000285159
TSNAX-DISC1	TSNAX-DISC1 Readthrough (NMD Candidate)	RNA Gene	18	GC01P231528	5.55	https://www.genecards.org/cgi-bin/carddisp.pl?gene=TSNAX-DISC1
SLC5A4-AS1	SLC5A4 Antisense RNA 1	RNA Gene	11	GC22P032206	5.54	https://www.genecards.org/cgi-bin/carddisp.pl?gene=SLC5A4-AS1
INHBA-AS1	INHBA Antisense RNA 1	RNA Gene	15	GC07P041693	5.54	https://www.genecards.org/cgi-bin/carddisp.pl?gene=INHBA-AS1
SLC7A11-AS1	SLC7A11 Antisense RNA 1	RNA Gene	14	GC04P138027	5.53	https://www.genecards.org/cgi-bin/carddisp.pl?gene=SLC7A11-AS1
MACC1-AS1	MACC1 Antisense RNA 1	RNA Gene	14	GC07P020183	5.53	https://www.genecards.org/cgi-bin/carddisp.pl?gene=MACC1-AS1
LINC00572	Long Intergenic Non-Protein Coding RNA 572	RNA Gene	14	GC13M029918	5.52	https://www.genecards.org/cgi-bin/carddisp.pl?gene=LINC00572
KRT18P55	Keratin 18 Pseudogene 55	Pseudogene	21	GC17M028275	5.52	https://www.genecards.org/cgi-bin/carddisp.pl?gene=KRT18P55
AKR7L	Aldo-Keto Reductase Family 7 Like (Gene/Pseudogene)	Protein Coding	30	GC01M019265	5.52	https://www.genecards.org/cgi-bin/carddisp.pl?gene=AKR7L
LOC101929759	Uncharacterized LOC101929759	RNA Gene	10	GC08P069834	5.51	https://www.genecards.org/cgi-bin/carddisp.pl?gene=LOC101929759
LAMC2	Laminin Subunit Gamma 2	Protein Coding	46	GC01P183155	5.5	https://www.genecards.org/cgi-bin/carddisp.pl?gene=LAMC2
MIR512-1	MicroRNA 512-1	RNA Gene	15	GC19P054033	5.48	https://www.genecards.org/cgi-bin/carddisp.pl?gene=MIR512-1
MYLK-AS1	MYLK Antisense RNA 1	RNA Gene	16	GC03P123588	5.48	https://www.genecards.org/cgi-bin/carddisp.pl?gene=MYLK-AS1
ENSG00000232406		Uncategorized	8	GC20M036149	5.48	https://www.genecards.org/cgi-bin/carddisp.pl?gene=ENSG00000232406
TCONS_00068220	Uncharacterized TCONS_00068220	RNA Gene	5	GC08M047990	5.47	https://www.genecards.org/cgi-bin/carddisp.pl?gene=TCONS_00068220
SH3RF3-AS1	SH3RF3 Antisense RNA 1	RNA Gene	13	GC02M109127	5.47	https://www.genecards.org/cgi-bin/carddisp.pl?gene=SH3RF3-AS1
LINC01612	Long Intergenic Non-Protein Coding RNA 1612	RNA Gene	12	GC04P170226	5.47	https://www.genecards.org/cgi-bin/carddisp.pl?gene=LINC01612
RUNX1-IT1	RUNX1 Intronic Transcript 1	RNA Gene	17	GC21M035037	5.45	https://www.genecards.org/cgi-bin/carddisp.pl?gene=RUNX1-IT1
SUCLG2-AS1	SUCLG2 Antisense RNA 1 (Head To Head)	RNA Gene	13	GC03P067654	5.45	https://www.genecards.org/cgi-bin/carddisp.pl?gene=SUCLG2-AS1
LINC01097	Long Intergenic Non-Protein Coding RNA 1097	RNA Gene	13	GC04M013529	5.45	https://www.genecards.org/cgi-bin/carddisp.pl?gene=LINC01097
ENSG00000224220		RNA Gene	7	GC02P025421	5.45	https://www.genecards.org/cgi-bin/carddisp.pl?gene=ENSG00000224220
ENSG00000277200		RNA Gene	5	GC17M002720	5.45	https://www.genecards.org/cgi-bin/carddisp.pl?gene=ENSG00000277200
ZFHX4-AS1	ZFHX4 Antisense RNA 1	RNA Gene	15	GC08M076491	5.43	https://www.genecards.org/cgi-bin/carddisp.pl?gene=ZFHX4-AS1
ENSG00000229717		RNA Gene	8	GC04P075830	5.43	https://www.genecards.org/cgi-bin/carddisp.pl?gene=ENSG00000229717
ALDOA	Aldolase, Fructose-Bisphosphate A	Protein Coding	49	GC16P030055	5.41	https://www.genecards.org/cgi-bin/carddisp.pl?gene=ALDOA
A2M-AS1	A2M Antisense RNA 1	RNA Gene	14	GC12P009065	5.4	https://www.genecards.org/cgi-bin/carddisp.pl?gene=A2M-AS1
LINC01856	Long Intergenic Non-Protein Coding RNA 1856	RNA Gene	9	GC02P129924	5.4	https://www.genecards.org/cgi-bin/carddisp.pl?gene=LINC01856
LINC02461	Long Intergenic Non-Protein Coding RNA 2461	RNA Gene	9	GC12P043156	5.4	https://www.genecards.org/cgi-bin/carddisp.pl?gene=LINC02461
ENSG00000253389		RNA Gene	7	GC08P041682	5.4	https://www.genecards.org/cgi-bin/carddisp.pl?gene=ENSG00000253389
ENSG00000250406		RNA Gene	5	GC04P144851	5.4	https://www.genecards.org/cgi-bin/carddisp.pl?gene=ENSG00000250406
LOC105372446	Uncharacterized LOC105372446	RNA Gene	5	GC19P051395	5.4	https://www.genecards.org/cgi-bin/carddisp.pl?gene=LOC105372446
ARID1A	AT-Rich Interaction Domain 1A	Protein Coding	47	GC01P026706	5.39	https://www.genecards.org/cgi-bin/carddisp.pl?gene=ARID1A
LOC111589215	BRCA1 Promoter Region	Biological Region	2	GC17U902746	5.24	https://www.genecards.org/cgi-bin/carddisp.pl?gene=LOC111589215
XRCC6	X-Ray Repair Cross Complementing 6	Protein Coding	47	GC22P041622	5.24	https://www.genecards.org/cgi-bin/carddisp.pl?gene=XRCC6
CDH13	Cadherin 13	Protein Coding	43	GC16P082626	5.17	https://www.genecards.org/cgi-bin/carddisp.pl?gene=CDH13
CSNK1D	Casein Kinase 1 Delta	Protein Coding	51	GC17M082239	5.12	https://www.genecards.org/cgi-bin/carddisp.pl?gene=CSNK1D
SERPINF1	Serpin Family F Member 1	Protein Coding	46	GC17P001761	5.07	https://www.genecards.org/cgi-bin/carddisp.pl?gene=SERPINF1
MBD4	Methyl-CpG Binding Domain 4, DNA Glycosylase	Protein Coding	43	GC03M129430	5.06	https://www.genecards.org/cgi-bin/carddisp.pl?gene=MBD4
E2F2	E2F Transcription Factor 2	Protein Coding	44	GC01M023507	5	https://www.genecards.org/cgi-bin/carddisp.pl?gene=E2F2
APRT	Adenine Phosphoribosyltransferase	Protein Coding	48	GC16M088810	4.87	https://www.genecards.org/cgi-bin/carddisp.pl?gene=APRT
CASP5	Caspase 5	Protein Coding	45	GC11M104995	4.62	https://www.genecards.org/cgi-bin/carddisp.pl?gene=CASP5
TFPI	Tissue Factor Pathway Inhibitor	Protein Coding	46	GC02M187464	4.44	https://www.genecards.org/cgi-bin/carddisp.pl?gene=TFPI
FHL2	Four And A Half LIM Domains 2	Protein Coding	46	GC02M105343	4.23	https://www.genecards.org/cgi-bin/carddisp.pl?gene=FHL2
SELENBP1	Selenium Binding Protein 1	Protein Coding	44	GC01M151364	4.18	https://www.genecards.org/cgi-bin/carddisp.pl?gene=SELENBP1
ACVR2A	Activin A Receptor Type 2A	Protein Coding	46	GC02P147844	4.04	https://www.genecards.org/cgi-bin/carddisp.pl?gene=ACVR2A
PBK	PDZ Binding Kinase	Protein Coding	44	GC08M027809	4.04	https://www.genecards.org/cgi-bin/carddisp.pl?gene=PBK
PTPRG	Protein Tyrosine Phosphatase Receptor Type G	Protein Coding	44	GC03P061522	3.96	https://www.genecards.org/cgi-bin/carddisp.pl?gene=PTPRG
HSPH1	Heat Shock Protein Family H (Hsp110) Member 1	Protein Coding	44	GC13M031134	3.93	https://www.genecards.org/cgi-bin/carddisp.pl?gene=HSPH1
SFRP1	Secreted Frizzled Related Protein 1	Protein Coding	45	GC08M041238	3.89	https://www.genecards.org/cgi-bin/carddisp.pl?gene=SFRP1
PCBD1	Pterin-4 Alpha-Carbinolamine Dehydratase 1	Protein Coding	46	GC10M070882	3.7	https://www.genecards.org/cgi-bin/carddisp.pl?gene=PCBD1
SHMT1	Serine Hydroxymethyltransferase 1	Protein Coding	46	GC17M018334	3.62	https://www.genecards.org/cgi-bin/carddisp.pl?gene=SHMT1
TMSB4X	Thymosin Beta 4 X-Linked	Protein Coding	41	GC0XP012975	3.45	https://www.genecards.org/cgi-bin/carddisp.pl?gene=TMSB4X
AIM2	Absent In Melanoma 2	Protein Coding	43	GC01M159062	3.27	https://www.genecards.org/cgi-bin/carddisp.pl?gene=AIM2
TARBP2	TARBP2 Subunit Of RISC Loading Complex	Protein Coding	41	GC12P053499	3.22	https://www.genecards.org/cgi-bin/carddisp.pl?gene=TARBP2
EPHB6	EPH Receptor B6	Protein Coding	46	GC07P144497	3.19	https://www.genecards.org/cgi-bin/carddisp.pl?gene=EPHB6
CKB	Creatine Kinase B	Protein Coding	47	GC14M103519	3.16	https://www.genecards.org/cgi-bin/carddisp.pl?gene=CKB
EEF2	Eukaryotic Translation Elongation Factor 2	Protein Coding	50	GC19M003976	3.13	https://www.genecards.org/cgi-bin/carddisp.pl?gene=EEF2
KAT2A	Lysine Acetyltransferase 2A	Protein Coding	48	GC17M042113	3.02	https://www.genecards.org/cgi-bin/carddisp.pl?gene=KAT2A
MYOD1	Myogenic Differentiation 1	Protein Coding	46	GC11P017741	3.01	https://www.genecards.org/cgi-bin/carddisp.pl?gene=MYOD1
LMAN1	Lectin, Mannose Binding 1	Protein Coding	46	GC18M059327	2.97	https://www.genecards.org/cgi-bin/carddisp.pl?gene=LMAN1
CSNK1E	Casein Kinase 1 Epsilon	Protein Coding	49	GC22M042993	2.96	https://www.genecards.org/cgi-bin/carddisp.pl?gene=CSNK1E
UNC5C	Unc-5 Netrin Receptor C	Protein Coding	42	GC04M095162	2.91	https://www.genecards.org/cgi-bin/carddisp.pl?gene=UNC5C
IARS1	Isoleucyl-TRNA Synthetase 1	Protein Coding	36	GC09M092211	2.83	https://www.genecards.org/cgi-bin/carddisp.pl?gene=IARS1
SPTBN1	Spectrin Beta, Non-Erythrocytic 1	Protein Coding	45	GC02P054456	2.83	https://www.genecards.org/cgi-bin/carddisp.pl?gene=SPTBN1
MRC1	Mannose Receptor C-Type 1	Protein Coding	40	GC10P017809	2.81	https://www.genecards.org/cgi-bin/carddisp.pl?gene=MRC1
FTO	FTO Alpha-Ketoglutarate Dependent Dioxygenase	Protein Coding	46	GC16P053737	2.8	https://www.genecards.org/cgi-bin/carddisp.pl?gene=FTO
ITGA9	Integrin Subunit Alpha 9	Protein Coding	44	GC03P037468	2.71	https://www.genecards.org/cgi-bin/carddisp.pl?gene=ITGA9
FLNB	Filamin B	Protein Coding	46	GC03P058008	2.7	https://www.genecards.org/cgi-bin/carddisp.pl?gene=FLNB
FBXO32	F-Box Protein 32	Protein Coding	41	GC08M123498	2.68	https://www.genecards.org/cgi-bin/carddisp.pl?gene=FBXO32
COL5A2	Collagen Type V Alpha 2 Chain	Protein Coding	42	GC02M189031	2.65	https://www.genecards.org/cgi-bin/carddisp.pl?gene=COL5A2
TXN2	Thioredoxin 2	Protein Coding	46	GC22M036467	2.64	https://www.genecards.org/cgi-bin/carddisp.pl?gene=TXN2
FCGBP	Fc Fragment Of IgG Binding Protein	Protein Coding	36	GC19M039863	2.62	https://www.genecards.org/cgi-bin/carddisp.pl?gene=FCGBP
MIR20B	MicroRNA 20b	RNA Gene	14	GC0XM134237	2.59	https://www.genecards.org/cgi-bin/carddisp.pl?gene=MIR20B
ARAF	A-Raf Proto-Oncogene, Serine/Threonine Kinase	Protein Coding	46	GC0XP047562	2.55	https://www.genecards.org/cgi-bin/carddisp.pl?gene=ARAF
TCF7L1	Transcription Factor 7 Like 1	Protein Coding	42	GC02P085133	2.43	https://www.genecards.org/cgi-bin/carddisp.pl?gene=TCF7L1
ANXA6	Annexin A6	Protein Coding	44	GC05M151077	2.39	https://www.genecards.org/cgi-bin/carddisp.pl?gene=ANXA6
MAP2K6	Mitogen-Activated Protein Kinase Kinase 6	Protein Coding	48	GC17P069414	2.39	https://www.genecards.org/cgi-bin/carddisp.pl?gene=MAP2K6
CNC2	Carney Complex Type 2, Multiple Neoplasia And Lentiginosis	Genetic Locus	8	GC02U990267	2.38	https://www.genecards.org/cgi-bin/carddisp.pl?gene=CNC2
BMP3	Bone Morphogenetic Protein 3	Protein Coding	42	GC04P081030	2.33	https://www.genecards.org/cgi-bin/carddisp.pl?gene=BMP3
PTGDS	Prostaglandin D2 Synthase	Protein Coding	46	GC09P136977	2.31	https://www.genecards.org/cgi-bin/carddisp.pl?gene=PTGDS
CAPN5	Calpain 5	Protein Coding	44	GC11P077066	2.26	https://www.genecards.org/cgi-bin/carddisp.pl?gene=CAPN5
RNASE1	Ribonuclease A Family Member 1, Pancreatic	Protein Coding	42	GC14M020801	2.22	https://www.genecards.org/cgi-bin/carddisp.pl?gene=RNASE1
PNPT1	Polyribonucleotide Nucleotidyltransferase 1	Protein Coding	43	GC02M055634	2.15	https://www.genecards.org/cgi-bin/carddisp.pl?gene=PNPT1
C12orf75	Chromosome 12 Open Reading Frame 75	Protein Coding	30	GC12P105235	2.14	https://www.genecards.org/cgi-bin/carddisp.pl?gene=C12orf75
RAD23B	RAD23 Homolog B, Nucleotide Excision Repair Protein	Protein Coding	45	GC09P107283	2.1	https://www.genecards.org/cgi-bin/carddisp.pl?gene=RAD23B
GABARAP	GABA Type A Receptor-Associated Protein	Protein Coding	45	GC17M007240	2.05	https://www.genecards.org/cgi-bin/carddisp.pl?gene=GABARAP
CSMD3	CUB And Sushi Multiple Domains 3	Protein Coding	37	GC08M112223	1.98	https://www.genecards.org/cgi-bin/carddisp.pl?gene=CSMD3
MYCNOS	MYCN Opposite Strand	RNA Gene	24	GC02M015918	1.95	https://www.genecards.org/cgi-bin/carddisp.pl?gene=MYCNOS
EEF1G	Eukaryotic Translation Elongation Factor 1 Gamma	Protein Coding	42	GC11M062560	1.94	https://www.genecards.org/cgi-bin/carddisp.pl?gene=EEF1G
MSH5	MutS Homolog 5	Protein Coding	42	GC06P032620	1.93	https://www.genecards.org/cgi-bin/carddisp.pl?gene=MSH5
MT1X	Metallothionein 1X	Protein Coding	41	GC16P056690	1.88	https://www.genecards.org/cgi-bin/carddisp.pl?gene=MT1X
IGKC	Immunoglobulin Kappa Constant	Protein Coding	33	GC02M088984	1.63	https://www.genecards.org/cgi-bin/carddisp.pl?gene=IGKC
PARVA	Parvin Alpha	Protein Coding	45	GC11P012398	1.63	https://www.genecards.org/cgi-bin/carddisp.pl?gene=PARVA
CKAP4	Cytoskeleton Associated Protein 4	Protein Coding	38	GC12M106237	1.56	https://www.genecards.org/cgi-bin/carddisp.pl?gene=CKAP4
KRT24	Keratin 24	Protein Coding	37	GC17M040697	1.54	https://www.genecards.org/cgi-bin/carddisp.pl?gene=KRT24
MMRN1	Multimerin 1	Protein Coding	38	GC04P089879	1.48	https://www.genecards.org/cgi-bin/carddisp.pl?gene=MMRN1
WDR20	WD Repeat Domain 20	Protein Coding	36	GC14P103947	1.47	https://www.genecards.org/cgi-bin/carddisp.pl?gene=WDR20
MYL6	Myosin Light Chain 6	Protein Coding	41	GC12P056158	1.44	https://www.genecards.org/cgi-bin/carddisp.pl?gene=MYL6
EIF2A	Eukaryotic Translation Initiation Factor 2A	Protein Coding	41	GC03P150546	1.44	https://www.genecards.org/cgi-bin/carddisp.pl?gene=EIF2A
SEC61A1	SEC61 Translocon Alpha 1 Subunit	Protein Coding	42	GC03P128051	1.43	https://www.genecards.org/cgi-bin/carddisp.pl?gene=SEC61A1
SETD6	SET Domain Containing 6, Protein Lysine Methyltransferase	Protein Coding	36	GC16P058514	1.39	https://www.genecards.org/cgi-bin/carddisp.pl?gene=SETD6
PMS2P1	PMS1 Homolog 2, Mismatch Repair System Component Pseudogene 1	Pseudogene	23	GC07M100320	1.32	https://www.genecards.org/cgi-bin/carddisp.pl?gene=PMS2P1
DTX2P1-UPK3BP1-PMS2P11	DTX2P1-UPK3BP1-PMS2P11 Readthrough, Transcribed Pseudogene	Pseudogene	13	GC07P076959	1.3	https://www.genecards.org/cgi-bin/carddisp.pl?gene=DTX2P1-UPK3BP1-PMS2P11
PMS2P2	PMS1 Homolog 2, Mismatch Repair System Component Pseudogene 2	Pseudogene	21	GC07M075343	1.29	https://www.genecards.org/cgi-bin/carddisp.pl?gene=PMS2P2
GOLGA4	Golgin A4	Protein Coding	36	GC03P037243	1.27	https://www.genecards.org/cgi-bin/carddisp.pl?gene=GOLGA4
STAP2	Signal Transducing Adaptor Family Member 2	Protein Coding	38	GC19M004324	1.26	https://www.genecards.org/cgi-bin/carddisp.pl?gene=STAP2
ORM1	Orosomucoid 1	Protein Coding	41	GC09P114323	1.24	https://www.genecards.org/cgi-bin/carddisp.pl?gene=ORM1
ANXA10	Annexin A10	Protein Coding	37	GC04P168081	1.24	https://www.genecards.org/cgi-bin/carddisp.pl?gene=ANXA10
PMS2P3	PMS1 Homolog 2, Mismatch Repair System Component Pseudogene 3	Pseudogene	23	GC07M075507	1.24	https://www.genecards.org/cgi-bin/carddisp.pl?gene=PMS2P3
CAB39L	Calcium Binding Protein 39 Like	Protein Coding	37	GC13M049308	1.18	https://www.genecards.org/cgi-bin/carddisp.pl?gene=CAB39L
PARP12	Poly(ADP-Ribose) Polymerase Family Member 12	Protein Coding	38	GC07M140023	1.13	https://www.genecards.org/cgi-bin/carddisp.pl?gene=PARP12
PMS2P9	PMS1 Homolog 2, Mismatch Repair System Component Pseudogene 9	Pseudogene	15	GC07P077039	1.09	https://www.genecards.org/cgi-bin/carddisp.pl?gene=PMS2P9
MHS2	Malignant Hyperthermia Susceptibility 2	Genetic Locus	6	GC17U990058	1.05	https://www.genecards.org/cgi-bin/carddisp.pl?gene=MHS2
SERPINA2	Serpin Family A Member 2 (Gene/Pseudogene)	Protein Coding	28	GC14M094363	1.03	https://www.genecards.org/cgi-bin/carddisp.pl?gene=SERPINA2
PMS2P7	PMS1 Homolog 2, Mismatch Repair System Component Pseudogene 7	Pseudogene	10	GC07P073006	1.02	https://www.genecards.org/cgi-bin/carddisp.pl?gene=PMS2P7
VAMP8	Vesicle Associated Membrane Protein 8	Protein Coding	42	GC02P085561	1.02	https://www.genecards.org/cgi-bin/carddisp.pl?gene=VAMP8
MCM9	Minichromosome Maintenance 9 Homologous Recombination Repair Factor	Protein Coding	40	GC06M118813	0.97	https://www.genecards.org/cgi-bin/carddisp.pl?gene=MCM9
DDX47	DEAD-Box Helicase 47	Protein Coding	38	GC12P012814	0.87	https://www.genecards.org/cgi-bin/carddisp.pl?gene=DDX47
PMS2P4	PMS1 Homolog 2, Mismatch Repair System Component Pseudogene 4	Pseudogene	13	GC07M067276	0.87	https://www.genecards.org/cgi-bin/carddisp.pl?gene=PMS2P4
PMS2P5	PMS1 Homolog 2, Mismatch Repair System Component Pseudogene 5	Pseudogene	21	GC07P074890	0.85	https://www.genecards.org/cgi-bin/carddisp.pl?gene=PMS2P5
RAPGEFL1	Rap Guanine Nucleotide Exchange Factor Like 1	Protein Coding	34	GC17P040177	0.85	https://www.genecards.org/cgi-bin/carddisp.pl?gene=RAPGEFL1
EXOC3	Exocyst Complex Component 3	Protein Coding	38	GC05P000443	0.85	https://www.genecards.org/cgi-bin/carddisp.pl?gene=EXOC3
NT5C3B	5'-Nucleotidase, Cytosolic IIIB	Protein Coding	34	GC17M041825	0.74	https://www.genecards.org/cgi-bin/carddisp.pl?gene=NT5C3B
PMS2CL	PMS2 C-Terminal Like Pseudogene	Pseudogene	21	GC07P006711	0.73	https://www.genecards.org/cgi-bin/carddisp.pl?gene=PMS2CL
MSH4	MutS Homolog 4	Protein Coding	38	GC01P075796	0.72	https://www.genecards.org/cgi-bin/carddisp.pl?gene=MSH4
PMS2P11	PMS1 Homolog 2, Mismatch Repair System Component Pseudogene 11	Pseudogene	16	GC07P077011	0.66	https://www.genecards.org/cgi-bin/carddisp.pl?gene=PMS2P11
PMS2P10	PMS1 Homolog 2, Mismatch Repair System Component Pseudogene 10	Pseudogene	13	GC07M075323	0.6	https://www.genecards.org/cgi-bin/carddisp.pl?gene=PMS2P10
OPN3	Opsin 3	Protein Coding	39	GC01M241590	0.42	https://www.genecards.org/cgi-bin/carddisp.pl?gene=OPN3
